# Supplementary material for: A machine learning approach: a classification model for overdose
Source: Research Square preprint supplement (doi:10.21203/rs.3.rs-7380471/v1), 2025-10-07
Supplement: Supplementary file 1 [file 2792c2dcf990509b37ddd668.docx]

Computational Tools and Code

Packages utilized on RStudio

Attached Packages:

1. arsenal, 3.6.2
2. MatchIt, 4.55
3. knn, 1.3.1
4. workflows, 0.2.1
5. tune, 0.1.1
6. rsample, 0.0.8
7. recipes, 0.1.14
8. parsnip, 0.1.4
9. modeldata, 0.1.0
10. infer, 0.5.3
11. dials, 0.0.9
12. scales, 1.2.1
13. broom, 1.0.4
14. tidymodels, 0.1.1
15. pROC, 1.18.2
16. here, 1.0.1
17. data.table, 1.14.2
18. mlbench, 2.1-3.1
19. randomForest, 4.6-14
20. SHAPforxgboost, 0.1.3
21. ROCR, 1.0-11
22. rnn, 1.9.0
23. imbalance, 1.0.2.1
24. ROSE, 0.0-4
25. Boruta, 8.0.0
26. yardstick, 0.0.7
27. naniar, 0.6.0
28. vctrs, 0.6.3
29. mice, 3.15.0
30. xgboost, 1.2.0.1
31. caret, 6.0-94
32. lattice, 0.20-41
33. gapminder, 0.3.0
34. lubridate, 1.9.2
35. forcats, 1.0.0
36. stringr, 1.5.0
37. dplyr, 1.1.2
38. purrr, 1.0.1
39. readr, 2.1.4
40. tidyr, 1.3.0
41. tibble, 3.2.1
42. ggplot2, 3.4.2
43. tidyverse, 2.0.0
44. rlang, 1.1.1
45. tensorflow, 2.2.0
46. keras, 2.3.0.0
47. stringi, 1.7.6
48. foreach, 1.5.2
49. checkmate, 2.0.0
50. lhs, 1.1.1
51. lava, 1.6.8.1
52. pkgconfig, 2.0.3
53. e1071, 1.7-8
54. pROC, 1.18.0
55. survival, 3.3-5
56. abind, 1.4-5
57. tseries, 0.10-50
58. timeDate, 3043.102
59. ModelMetrics, 1.2.2.2
60. recipes, 0.1.16
61. dplyr, 1.0.7
62. tidyr, 1.1.4
63. tibble, 3.1.6
64. ggplot2, 3.3.5
65. keras, 2.7.0
66. tensorflow, 2.7.0
67. coorplot, 0.84

Packages loaded via a namespace (and not attached):

1. colorspace, 2.0-3
2. ggsignif, 0.6.0
3. class, 7.3-17
4. rprojroot, 2.0.3
5. visdat, 0.5.3
6. base64enc, 0.1-3
7. rstudioapi, 0.14
8. listenv, 0.8.0
9. furrr, 0.2.1
10. ggpubr, 0.6.0
11. prodlim, 2019.11.13
12. farver, 2.1.0
13. fansi, 1.0.3
14. codetools, 0.2-18
15. splines, 4.0.5
16. knitr

Code for forest plots

All coding files were extracted via R Markdown (370). Markdown is a simple formatting syntax for authoring HTML, PDF, and MS Word documents. For more details on using R Markdown see <http://rmarkdown.rstudio.com>.

When you click the **Knit** button a document will be generated that includes both content as well as the output of any embedded R code chunks within the document.

Code for forest plots

library(forestplot)

## Loading required package: grid

## Loading required package: checkmate

## Loading required package: abind

library(tidyverse)

## ── Attaching core tidyverse packages ──────────────────────── tidyverse 2.0.0 ──
## ✔ dplyr 1.1.3 ✔ readr 2.1.4
## ✔ forcats 1.0.0 ✔ stringr 1.5.0
## ✔ ggplot2 3.4.1 ✔ tibble 3.2.1
## ✔ lubridate 1.9.2 ✔ tidyr 1.3.0
## ✔ purrr 1.0.2

## ── Conflicts ────────────────────────────────────────── tidyverse_conflicts() ──
## ✖ dplyr::filter() masks stats::filter()
## ✖ dplyr::lag() masks stats::lag()
## ℹ Use the conflicted package (<http://conflicted.r-lib.org/>) to force all conflicts to become errors

# P <- AUCCIforestplot |>
# ggplot(aes(y = reorder(Model_type, +AUC))) +
# theme_classic() +
# geom_point(aes(x= AUC), shape=15, size=3) +
# geom_linerange(aes(xmin=lower, xmax=upper))+
# labs(x="AUC scores", y="Model Type")

# p_left <-
# AUCCIforestplot %>%
# ggplot(aes(y = reorder(Model_type, +AUC)))
# p_left
#
# p_left <-
# p_left +
# geom_text(aes(x = 0, label = Model_type), hjust = 0, fontface = "bold")
#
#
# p_left <-
# p_left +
# geom_text(
# aes(x = 1, label = AUCCI),
# hjust = 0,
# fontface = ifelse(AUCCIforestplot$AUCCI == "AUC (95% CI)", "bold", "plain")
# )
#
# p_left
#
# p_left <-
# p_left +
# theme_void() +
# coord_cartesian(xlim = c(0, 4))
#
# p_left

# P <- AUCCIFOD |>
# ggplot(aes(y = reorder(Model_type, +AUC))) +
# theme_classic() +
# geom_point(aes(x= AUC), shape=15, size=3) +
# geom_linerange(aes(xmin=lower, xmax=upper))+
# labs(x="AUC scores", y="Model Type")
#
# P

# p_left <-
# AUCCIFOD %>%
# ggplot(aes(y = reorder(Model_type, +AUC)))
# p_left
#
# p_left <-
# p_left +
# geom_text(aes(x = 0, label = Model_type), hjust = 0, fontface = "bold")
#
#
# p_left <-
# p_left +
# geom_text(
# aes(x = 1, label = AUCCI),
# hjust = 0,
# fontface = ifelse(AUCCIFOD$AUCCI == "AUC (95% CI)", "bold", "plain")
# )
#
# p_left
#
# p_left <-
# p_left +
# theme_void() +
# coord_cartesian(xlim = c(0, 4))
#
# p_left

Data wrangling code

All coding files were extracted via R Markdown (370). Markdown is a simple formatting syntax for authoring HTML, PDF, and MS Word documents. For more details on using R Markdown see <http://rmarkdown.rstudio.com>.

When you click the **Knit** button a document will be generated that includes both content as well as the output of any embedded R code chunks within the document.

Total instances file

library(tidyverse)

## -- Attaching core tidyverse packages ------------------------ tidyverse 2.0.0 --
## v dplyr 1.1.2 v readr 2.1.4
## v forcats 1.0.0 v stringr 1.5.0
## v ggplot2 3.4.2 v tibble 3.2.1
## v lubridate 1.9.2 v tidyr 1.3.0
## v purrr 1.0.1
## -- Conflicts ------------------------------------------ tidyverse_conflicts() --
## x dplyr::filter() masks stats::filter()
## x dplyr::lag() masks stats::lag()
## i Use the conflicted package (<http://conflicted.r-lib.org/>) to force all conflicts to become errors

library(dplyr)
library(gapminder)

## Warning: One or more parsing issues, call `problems()` on your data frame for details,
## e.g.:
## dat <- vroom(...)
## problems(dat)

# Pharmanetspss_total<- full_join(x = vw_od_case, y = Pharmanetspss, by = "moh_study_id", all.x = TRUE)
# MSP_clean_total <- full_join(x = vw_od_case, y = MSP_clean, by = "moh_study_id", all.x = TRUE)
# vw_dad_total <- full_join(x = vw_od_case, y = vw_dad, by = "moh_study_id", all.x = TRUE)

glimpse(Pharmanetspss)

## Rows: 57,902,314
## Columns: 7

glimpse(vw_dad)

## Rows: 1,663,940
## Columns: 141
glimpse(MSP_clean)

## Rows: 185,145,502
## Columns: 6

glimpse(vw_od_case)

## Rows: 36,679
## Columns: 7

Icd Code 9 Extraction

library(rlang)
library(tidyverse)

## -- Attaching core tidyverse packages ------------------------ tidyverse 2.0.0 --
## v dplyr 1.1.2 v readr 2.1.4
## v forcats 1.0.0 v stringr 1.5.0
## v ggplot2 3.4.2 v tibble 3.2.1
## v lubridate 1.9.2 v tidyr 1.3.0
## v purrr 1.0.1
## -- Conflicts ------------------------------------------ tidyverse_conflicts() --
## x purrr::%@%() masks rlang::%@%()
## x dplyr::filter() masks stats::filter()
## x purrr::flatten() masks rlang::flatten()
## x purrr::flatten_chr() masks rlang::flatten_chr()
## x purrr::flatten_dbl() masks rlang::flatten_dbl()
## x purrr::flatten_int() masks rlang::flatten_int()
## x purrr::flatten_lgl() masks rlang::flatten_lgl()
## x purrr::flatten_raw() masks rlang::flatten_raw()
## x purrr::invoke() masks rlang::invoke()
## x dplyr::lag() masks stats::lag()
## x purrr::splice() masks rlang::splice()
## i Use the conflicted package (<http://conflicted.r-lib.org/>) to force all conflicts to become errors

library(dplyr)
library(gapminder)
library(caret)

## Loading required package: lattice
##
## Attaching package: 'caret'
##
## The following object is masked from 'package:purrr':
##
## lift

library(xgboost)

##
## Attaching package: 'xgboost'
##
## The following object is masked from 'package:dplyr':
##
## slice

library(forcats)
library(mice)

##
## Attaching package: 'mice'
##
## The following object is masked from 'package:stats':
##
## filter
##
## The following objects are masked from 'package:base':
##
## cbind, rbind

library(vctrs)

##
## Attaching package: 'vctrs'
##
## The following object is masked from 'package:dplyr':
##
## data_frame
##
## The following object is masked from 'package:tibble':
##
## data_frame

###Data descriptive

MSP_clean <- read_csv("U:/Andy's Thesis/Raw_data_used/MSP_clean.csv" , show_col_types = FALSE)

glimpse(MSP_clean)

## Rows: 185,145,502
## Columns: 6

#testing

# ICD9_0 <- (MSP_clean %>%
# mutate(across(starts_with("diag_cd_"), ~case_when(
# (.x >= 2910) & (.x <= 2919) ~ 1,
# (.x >= 30300) & (.x <= 30303) ~ 1,
# (.x >= 3140) & (.x <= 3149) ~ 1,
# (.x >= 3140) & (.x <= 3149) ~ 1,
# .x=="291"~ 1,
#
#
#
#
# TRUE ~ 0), .names = "derivde{.col}")))
#
#
# ICD9_1 <- (MSP_clean %>%
# mutate(across(starts_with("diag_cd_"), ~case_when(
# (.x >= 2910) & (.x <= 2919) ~ 1,
# (.x >= 30300) & (.x <= 30303) ~ 1,
# (.x >= 3140) & (.x <= 3149) ~ 1,
# (.x >= 3140) & (.x <= 3149) ~ 1,
# .x=="291"~ 1,
#
#
#
#
#
# TRUE ~ 0), .names = "derivde2{.col}")))
#
#
# table(ICD9_0$derivdediag_cd_1)
# table(ICD9_1$derivde2diag_cd_1)
#
#
# Test1 <- ICD9_1 %>%
# select(moh_study_id, derivde2diag_cd_1, derivde2diag_cd_2, derivde2diag_cd_3)
#
# Test2 <- ICD9_0 %>%
# select(moh_study_id, derivdediag_cd_1, derivdediag_cd_2, derivdediag_cd_3)
#
# icd9_11 <- Test1 %>%
# group_by(moh_study_id) %>%
# summarize(derivde2diag_cd_1 = sum(derivde2diag_cd_1),
# derivde2diag_cd_2 = sum(derivde2diag_cd_2),
# derivde2diag_cd_3 = sum(derivde2diag_cd_3))
#
# icd9_12<-icd9_11 %>%
# mutate(Total = select(., -moh_study_id) %>%
# rowSums(na.rm = TRUE))
#
# icd9_13 <- icd9_12 %>%
# mutate(earlyonsetdisorders = if_else(Total >= 1, 1, 0))
#
# icd9_14 <- icd9_13 %>%
# select(moh_study_id, earlyonsetdisorders)
#
# icd9_21 <- Test2 %>%
# group_by(moh_study_id) %>%
# summarize(derivdediag_cd_1 = sum(derivdediag_cd_1),
# derivdediag_cd_2 = sum(derivdediag_cd_2),
# derivdediag_cd_3 = sum(derivdediag_cd_3))
#
# icd9_22 <- icd9_21 %>%
# mutate(Total = select(., -moh_study_id) %>%
# rowSums(na.rm = TRUE))
#
# icd9_23 <- icd9_22 %>%
# mutate(earlyonsetdisorders1= if_else(Total >= 1, 1, 0))
#
# icd9_24 <- icd9_23 %>%
# select(moh_study_id, earlyonsetdisorders1)

# table(icd9_14$earlyonsetdisorders)
# table(icd9_24$earlyonsetdisorders1)

# Test3 <-merge(icd9_14, icd9_24, by = "moh_study_id", all.x = TRUE)
#
#
# Test4 <- Test3 %>% mutate(new = earlyonsetdisorders+earlyonsetdisorders1)
#
# table(Test4$new )

#unique(MSP_clean$diag_cd_1)

# length(which(MSP_clean$diag_cd_1 == 291.0))
# length(which(MSP_clean$diag_cd_1 == 291))
# length(which(MSP_clean$diag_cd_1 == 2910))

###Template

# ICD9_0 <- (MSP_clean %>%
# mutate(across(starts_with("diag_cd_"), ~case_when(.x=="E8500"~ 1, .x== "3040" ~ 1, .x== "3047" ~ 1, .x=="3055"~ 1, .x== "9650" ~ 1,
#
#
# TRUE ~ 0), .names = "derivde{.col}")))

# ICD9_00 <- (MSP_clean %>%
# mutate(across(starts_with("diag_cd_"), ~case_when((.x >= 301) & (.x <= 301.9) ~ 1,
#
#
# TRUE ~ 0), .names = "derivde{.col}")))

###start

#
# ICD9_0 <- (MSP_clean %>%
# mutate(across(starts_with("diag_cd_"), ~case_when(
# .x=="1128"~ 1,
# .x== "11281" ~ 1,
# .x=="421"~ 1,
# .x== "4210" ~ 1,
# .x== "4211" ~ 1,
# .x=="4219"~ 1,
# .x== "422" ~ 1,
# .x=="4220"~ 1,
# .x== "4229" ~ 1,
# .x=="42290"~ 1,
# .x== "42291" ~ 1,
# .x== "42292" ~ 1,
# .x=="42293"~ 1,
# .x== "42299" ~ 1,
# .x== "424" ~ 1,
# .x=="4240"~ 1,
# .x== "4241" ~ 1,
# .x== "4242" ~ 1,
# .x=="4243"~ 1,
# .x== "4249" ~ 1,
# .x== "42490" ~ 1,
# .x=="42491"~ 1,
# .x== "42499" ~ 1,
#
#
# TRUE ~ 0), .names = "derivde{.col}")))

# ICD9_0 <- (MSP_clean %>%
# mutate(across(starts_with("diag_cd_"), ~case_when(
# .x=="038"~ 1,
# .x== "0380" ~ 1,
# .x=="0381"~ 1,
# .x== "03810" ~ 1,
# .x== "03812" ~ 1,
# .x=="03819"~ 1,
# .x== "03811" ~ 1,
# .x=="0382"~ 1,
# .x== "0383" ~ 1,
# .x=="0384"~ 1,
# .x== "03840" ~ 1,
# .x== "03841" ~ 1,
# .x=="03842"~ 1,
# .x== "03843" ~ 1,
# .x== "03844" ~ 1,
# .x=="03849"~ 1,
# .x== "0388" ~ 1,
# .x== "0389" ~ 1,
# .x=="4151"~ 1,
# .x== "41512" ~ 1,
# .x== "4229" ~ 1,
# .x=="42292"~ 1,
# .x== "449" ~ 1,
# .x=="78552"~ 1,
# .x== "7907" ~ 1,
# .x== "9959" ~ 1,
# .x=="99590"~ 1,
# .x== "99591" ~ 1,
# .x== "99592" ~ 1,
# .x== "99593" ~ 1,
# .x=="99594"~ 1,
#
#
# TRUE ~ 0), .names = "derivde{.col}")))

# ICD9_0 <- (MSP_clean %>%
# mutate(across(starts_with("diag_cd_"), ~case_when(
# .x=="730"~ 1,
# (.x >= 73000) & (.x <= 73009) ~ 1,
# (.x >= 73010) & (.x <= 73019) ~ 1,
# (.x >= 73020) & (.x <= 73029) ~ 1,
# (.x >= 73030) & (.x <= 73039) ~ 1,
# (.x >= 73070) & (.x <= 73078) ~ 1,
# (.x >= 73080) & (.x <= 73089) ~ 1,
# (.x >= 73090) & (.x <= 73099) ~ 1,
# .x== "7330" ~ 1,
# .x== "7301"~ 1,
# .x== "7302"~ 1,
# .x== "7303"~ 1,
# .x== "7307"~ 1,
# .x== "7308"~ 1,
# .x== "7309"~ 1,
#
#
#
# TRUE ~ 0), .names = "derivde{.col}")))

# ICD9_0 <- (MSP_clean %>%
# mutate(across(starts_with("diag_cd_"), ~case_when(
# (.x >= 0401) & (.x <= 0404) ~ 1,
# (.x >= 45181) & (.x <= 45189) ~ 1,
# .x== "0400"~ 1,
# .x== "040" ~ 1,
# (.x >= 04081) & (.x <= 04089) ~ 1,
# .x== "04041" ~ 1,
# .x== "04042"~ 1,
# .x== "0408" ~ 1,
# .x== "324"~ 1,
# .x== "3240" ~ 1,
# .x== "3241" ~ 1,
# .x== "3249"~ 1,
# .x== "326" ~ 1,
# .x== "451" ~ 1,
# (.x >= 45111) & (.x <= 45119) ~ 1,
# .x== "4510"~ 1,
# .x== "4511" ~ 1,
# .x== "4512" ~ 1,
# .x== "4518"~ 1,
# .x== "4519" ~ 1,
# .x== "567"~ 1,
# (.x >= 56721) & (.x <= 56739) ~ 1,
# (.x >= 5670) & (.x <= 5673) ~ 1,
# .x== "5678" ~ 1,
# .x== "56781" ~ 1,
# .x== "56782" ~ 1,
# .x== "56789"~ 1,
# .x== "5679"~ 1,
# .x== "5695" ~ 1,
# .x== "572" ~ 1,
#
#
#
# TRUE ~ 0), .names = "derivde{.col}")))

#
# ICD9_00 <- (MSP_clean %>%
# mutate(across(starts_with("diag_cd_"), ~case_when(
# (.x >= 5720) & (.x <= 5728) ~ 1,
# .x== "5901"~ 1,
# .x== "59010"~ 1,
# .x== "59011" ~ 1,
# .x== "681" ~ 1,
# .x== "6810" ~ 1,
# .x== "68100"~ 1,
# .x== "68101"~ 1,
# .x== "68102" ~ 1,
# .x== "6811" ~ 1,
# .x== "68110" ~ 1,
# .x== "67111"~ 1,
# .x== "6819"~ 1,
# .x== "707"~ 1,
# .x== "7070" ~ 1,
# (.x >= 70700) & (.x <= 70709) ~ 1,
# .x== "7071"~ 1,
# (.x >= 70710) & (.x <= 70719) ~ 1,
# .x== "7072" ~ 1,
# (.x >= 70720) & (.x <= 70725) ~ 1,
# .x== "7078"~ 1,
# .x== "7079" ~ 1,
# .x== "7098" ~ 1,
# .x== "7236" ~ 1,
# .x== "72886"~ 1,
# .x== "7293"~ 1,
# .x== "72930"~ 1,
# .x== "72939"~ 1,
# .x== "7854" ~ 1,
#
# TRUE ~ 0), .names = "derivde{.col}")))

# ICD9_0 <- (MSP_clean %>%
# mutate(across(starts_with("diag_cd_"), ~case_when(
# .x=="290"~ 1,
# .x=="2900"~ 1,
# .x=="2901"~ 1,
# (.x >= 29010) & (.x <= 29013) ~ 1,
# .x=="2902"~ 1,
# .x=="29020"~ 1,
# .x=="29021"~ 1,
# .x=="2903"~ 1,
# .x=="2904"~ 1,
# .x=="29040"~ 1,
# .x=="29041"~ 1,
# .x=="29042"~ 1,
# .x=="29043"~ 1,
# .x=="2908"~ 1,
# .x=="2909"~ 1,
# (.x >= 2930) & (.x <= 2949) ~ 1,
# .x=="310"~ 1,
# .x=="3100"~ 1,
# .x=="3101"~ 1,
# .x=="3102"~ 1,
# .x=="3108"~ 1,
# .x=="31081"~ 1,
# .x=="31089"~ 1,
# .x=="3109"~ 1,
#
#
#
#
#
# TRUE ~ 0), .names = "derivde{.col}")))

# ICD9_0 <- (MSP_clean %>%
# mutate(across(starts_with("diag_cd_"), ~case_when(
# .x=="291"~ 1,
# (.x >= 2910) & (.x <= 2918) ~ 1,
# (.x >= 29181) & (.x <= 29289) ~ 1,
# # .x=="29181"~ 1,
# # .x=="29182"~ 1,
# # .x=="29189"~ 1,
# # .x=="2919"~ 1,
# .x=="292"~ 1,
# .x=="2920"~ 1,
# .x=="2921"~ 1,
# # .x=="29211"~ 1,
# # .x=="29212"~ 1,
# .x=="2922"~ 1,
# .x=="2928"~ 1,
# # .x=="29281"~ 1,
# # .x=="29282"~ 1,
# # .x=="29283"~ 1,
# # .x=="29284"~ 1,
# # .x=="29289"~ 1,
# .x=="2929"~ 1,
# .x=="303"~ 1,
# .x=="3030"~ 1,
# (.x >= 30301) & (.x <= 30593) ~ 1,
# # .x=="30301"~ 1,
# # .x=="30302"~ 1,
# # .x=="30303"~ 1,
# .x=="3039"~ 1,
# .x=="3090"~ 1,
# # .x=="39391"~ 1,
# # .x=="30392"~ 1,
# # .x=="30393"~ 1,
# .x=="304"~ 1,
# .x=="3040"~ 1,
# # .x=="30400"~ 1,
# # .x=="30401"~ 1,
# # .x=="30402"~ 1,
# # .x=="30403"~ 1,
# .x=="3041"~ 1,
# # .x=="30400"~ 1,
# # .x=="30411"~ 1,
# # .x=="30412"~ 1,
# # .x=="30413"~ 1,
# .x=="3042"~ 1,
# # .x=="30420"~ 1,
# # .x=="30421"~ 1,
# # .x=="30422"~ 1,
# # .x=="30423"~ 1,
# .x=="3043"~ 1,
# # .x=="34030"~ 1,
# # .x=="30431"~ 1,
# # .x=="30432"~ 1,
# # .x=="30433"~ 1,
# .x=="3044"~ 1,
# # .x=="30440"~ 1,
# # .x=="30441"~ 1,
# # .x=="30442"~ 1,
# # .x=="30443"~ 1,
# .x=="3045"~ 1,
# # .x=="30450"~ 1,
# # .x=="30451"~ 1,
# # .x=="30452"~ 1,
# # .x=="30453"~ 1,
# .x=="3046"~ 1,
# # .x=="30460"~ 1,
# # .x=="30461"~ 1,
# # .x=="30462"~ 1,
# # .x=="30463"~ 1,
# .x=="3047"~ 1,
# # .x=="30470"~ 1,
# # .x=="30471"~ 1,
# # .x=="30472"~ 1,
# # .x=="30473"~ 1,
# .x=="3048"~ 1,
# # .x=="30480"~ 1,
# # .x=="30481"~ 1,
# # .x=="30482"~ 1,
# # .x=="30483"~ 1,
# .x=="3049"~ 1,
# # .x=="30490"~ 1,
# # .x=="30491"~ 1,
# # .x=="30492"~ 1,
# # .x=="30493"~ 1,
# .x=="305"~ 1,
# .x=="3050"~ 1,
# # .x=="30500"~ 1,
# # .x=="30501"~ 1,
# # .x=="30502"~ 1,
# # .x=="30503"~ 1,
# .x=="3051"~ 1,
# .x=="3052"~ 1,
# # .x=="30520"~ 1,
# # .x=="30521"~ 1,
# # .x=="30522"~ 1,
# # .x=="30523"~ 1,
# .x=="3053"~ 1,
# # .x=="30530"~ 1,
# # .x=="30531"~ 1,
# # .x=="30532"~ 1,
# # .x=="30533"~ 1,
# .x=="3054"~ 1,
# # .x=="30540"~ 1,
# # .x=="30541"~ 1,
# # .x=="30542"~ 1,
# # .x=="30543"~ 1,
# .x=="3055"~ 1,
# # .x=="30550"~ 1,
# # .x=="30551"~ 1,
# # .x=="30552"~ 1,
# # .x=="30553"~ 1,
# .x=="3056"~ 1,
# # .x=="30560"~ 1,
# # .x=="30561"~ 1,
# # .x=="30562"~ 1,
# # .x=="30563"~ 1,
# .x=="3057"~ 1,
# # .x=="30570"~ 1,
# # .x=="30571"~ 1,
# # .x=="30572"~ 1,
# # .x=="30573"~ 1,
# .x=="3058"~ 1,
# # .x=="30580"~ 1,
# # .x=="30581"~ 1,
# # .x=="30582"~ 1,
# # .x=="30583"~ 1,
# .x=="3059"~ 1,
# # .x=="30590"~ 1,
# # .x=="30591"~ 1,
# # .x=="30592"~ 1,
# # .x=="30593"~ 1,
#
#
#
#
#
# TRUE ~ 0), .names = "derivde{.col}")))

# ICD9_0 <- (MSP_clean %>%
# mutate(across(starts_with("diag_cd_"), ~case_when(
# .x=="2950"~ 1,
# (.x >= 29500) & (.x <= 29595) ~ 1,
# # .x=="29500"~ 1,
# # .x=="29501"~ 1,
# # .x=="29502"~ 1,
# # .x=="29503"~ 1,
# # .x=="29504"~ 1,
# # .x=="29505"~ 1,
# .x=="2951"~ 1,
# # .x=="29510"~ 1,
# # .x=="29511"~ 1,
# # .x=="29512"~ 1,
# # .x=="29513"~ 1,
# # .x=="29514"~ 1,
# # .x=="29515"~ 1,
# .x=="2952"~ 1,
# # .x=="29520"~ 1,
# # .x=="29521"~ 1,
# # .x=="29522"~ 1,
# # .x=="29523"~ 1,
# # .x=="29524"~ 1,
# # .x=="29525"~ 1,
# .x=="2953"~ 1,
# # .x=="29530"~ 1,
# # .x=="29531"~ 1,
# # .x=="29532"~ 1,
# # .x=="29533"~ 1,
# # .x=="29534"~ 1,
# # .x=="29535"~ 1,
# .x=="2954"~ 1,
# # .x=="29540"~ 1,
# # .x=="29541"~ 1,
# # .x=="29542"~ 1,
# # .x=="29543"~ 1,
# # .x=="29544"~ 1,
# # .x=="29545"~ 1,
# .x=="2955"~ 1,
# # .x=="29551"~ 1,
# # .x=="29552"~ 1,
# # .x=="29553"~ 1,
# # .x=="29554"~ 1,
# # .x=="29555"~ 1,
# .x=="2956"~ 1,
# # .x=="29561"~ 1,
# # .x=="29562"~ 1,
# # .x=="29563"~ 1,
# # .x=="29564"~ 1,
# # .x=="29565"~ 1,
# .x=="2957"~ 1,
# # .x=="29571"~ 1,
# # .x=="29572"~ 1,
# # .x=="29573"~ 1,
# # .x=="29574"~ 1,
# # .x=="29575"~ 1,
# .x=="2958"~ 1,
# # .x=="29581"~ 1,
# # .x=="29582"~ 1,
# # .x=="29583"~ 1,
# # .x=="29584"~ 1,
# # .x=="29585"~ 1,
# .x=="2959"~ 1,
# # .x=="29591"~ 1,
# # .x=="29592"~ 1,
# # .x=="29593"~ 1,
# # .x=="29594"~ 1,
# # .x=="29595"~ 1,
# .x=="298"~ 1,
# (.x >= 2970) & (.x <= 2989) ~ 1,
# # .x=="2980"~ 1,
# # .x=="2981"~ 1,
# # .x=="2982"~ 1,
# # .x=="2983"~ 1,
# # .x=="2984"~ 1,
# # .x=="2988"~ 1,
# # .x=="2989"~ 1,
# .x=="297"~ 1,
# # .x=="2970"~ 1,
# # .x=="2971"~ 1,
# # .x=="2972"~ 1,
# # .x=="2973"~ 1,
# # .x=="2978"~ 1,
# # .x=="2979"~ 1,
#
#
#
#
# TRUE ~ 0), .names = "derivde{.col}")))

# ICD9_0 <- (MSP_clean %>%
# mutate(across(starts_with("diag_cd_"), ~case_when(
# .x=="296"~ 1,
# (.x >= 29600) & (.x <= 29699) ~ 1,
# .x=="2960"~ 1,
# # .x=="29600"~ 1,
# # .x=="29601"~ 1,
# # .x=="29602"~ 1,
# # .x=="29606"~ 1,
# .x=="2961"~ 1,
# # .x=="29610"~ 1,
# # .x=="29611"~ 1,
# # .x=="29612"~ 1,
# # .x=="29613"~ 1,
# # .x=="29614"~ 1,
# # .x=="29615"~ 1,
# # .x=="29616"~ 1,
# .x=="2962"~ 1,
# # .x=="29620"~ 1,
# # .x=="29621"~ 1,
# # .x=="29622"~ 1,
# # .x=="29623"~ 1,
# # .x=="29624"~ 1,
# # .x=="29625"~ 1,
# # .x=="29626"~ 1,
# .x=="2963"~ 1,
# # .x=="29630"~ 1,
# # .x=="29631"~ 1,
# # .x=="29632"~ 1,
# # .x=="29633"~ 1,
# # .x=="29634"~ 1,
# # .x=="29635"~ 1,
# # .x=="29636"~ 1,
# .x=="2964"~ 1,
# # .x=="29640"~ 1,
# # .x=="29641"~ 1,
# # .x=="29642"~ 1,
# # .x=="29643"~ 1,
# # .x=="29644"~ 1,
# # .x=="29645"~ 1,
# # .x=="29646"~ 1,
# .x=="2965"~ 1,
# # .x=="29650"~ 1,
# # .x=="29651"~ 1,
# # .x=="29652"~ 1,
# # .x=="29653"~ 1,
# # .x=="29654"~ 1,
# # .x=="29655"~ 1,
# # .x=="29656"~ 1,
# .x=="2966"~ 1,
# # .x=="29660"~ 1,
# # .x=="29661"~ 1,
# # .x=="29662"~ 1,
# # .x=="29663"~ 1,
# # .x=="29664"~ 1,
# # .x=="29665"~ 1,
# # .x=="29666"~ 1,
# .x=="2967"~ 1,
# # .x=="29670"~ 1,
# .x=="2968"~ 1,
# # .x=="29680"~ 1,
# # .x=="29681"~ 1,
# # .x=="29682"~ 1,
# # .x=="29689"~ 1,
# .x=="2969"~ 1,
# # .x=="29690"~ 1,
# # .x=="29699"~ 1,
# .x=="3004"~ 1,
# .x=="311"~ 1,
#
#
#
#
#
#
# TRUE ~ 0), .names = "derivde{.col}")))

# ICD9_0 <- (MSP_clean %>%
# mutate(across(starts_with("diag_cd_"), ~case_when(
# (.x >= 3000) & (.x <= 3009) ~ 1,
# # .x=="3000"~ 1,
# # .x=="3001"~ 1,
# # .x=="3002"~ 1,
# # .x=="3003"~ 1,
# # .x=="3005"~ 1,
# # .x=="3007"~ 1,
# # .x=="3008"~ 1,
# # .x=="3009"~ 1,
# (.x >= 3060) & (.x <= 3069) ~ 1,
# .x=="306"~ 1,
# # .x=="3060"~ 1,
# # .x=="3061"~ 1,
# # .x=="3062"~ 1,
# # .x=="3063"~ 1,
# # .x=="3064"~ 1,
# # .x=="3065"~ 1,
# (.x >= 30650) & (.x <= 30659) ~ 1,
# # .x=="30650"~ 1,
# # .x=="30651"~ 1,
# # .x=="30652"~ 1,
# # .x=="30653"~ 1,
# # .x=="30659"~ 1,
# # .x=="3066"~ 1,
# # .x=="3067"~ 1,
# # .x=="3068"~ 1,
# # .x=="3069"~ 1,
# .x=="309"~ 1,
# (.x >= 3090) & (.x <= 3099) ~ 1,
# # .x=="3090"~ 1,
# # .x=="3091"~ 1,
# # .x=="3092"~ 1,
# (.x >= 30921) & (.x <= 30929) ~ 1,
# # .x=="30921"~ 1,
# # .x=="30922"~ 1,
# # .x=="30923"~ 1,
# # .x=="30924"~ 1,
# # .x=="30928"~ 1,
# # .x=="30929"~ 1,
# # .x=="3093"~ 1,
# # .x=="3094"~ 1,
# # .x=="3098"~ 1,
# (.x >= 30981) & (.x <= 30989) ~ 1,
# # .x=="30981"~ 1,
# # .x=="30982"~ 1,
# # .x=="30983"~ 1,
# # .x=="30924"~ 1,
# # .x=="30989"~ 1,
# # .x=="3099"~ 1,
#
#
#
#
# TRUE ~ 0), .names = "derivde{.col}")))

# ICD9_0 <- (MSP_clean %>%
# mutate(across(starts_with("diag_cd_"), ~case_when(
# .x=="302.7"~ 1,
# .x== "307.1" ~ 1,
# .x== "307.4" ~ 1,
# .x== "307.5" ~ 1,
# .x== "316" ~ 1,
#
#
#
# TRUE ~ 0), .names = "derivde{.col}")))

# ICD9_0 <- (MSP_clean %>%
# mutate(across(starts_with("diag_cd_"), ~case_when(
# .x=="301"~ 1,
# (.x >= 30110) & (.x <= 30189) ~ 1,
# (.x >= 3010) & (.x <= 3019) ~ 1,
# # .x== "3010" ~ 1,
# # .x== "3011" ~ 1,
# # .x== "30110" ~ 1,
# # .x== "30111" ~ 1,
# # .x== "30112" ~ 1,
# # .x== "30113" ~ 1,
# # .x== "3012" ~ 1,
# # .x== "30120" ~ 1,
# # .x== "30121" ~ 1,
# # .x== "30122" ~ 1,
# # .x== "3013" ~ 1,
# # .x== "3014" ~ 1,
# # .x== "30150" ~ 1,
# # .x== "30151" ~ 1,
# # .x== "30159" ~ 1,
# # .x== "3016" ~ 1,
# # .x== "3017" ~ 1,
# # .x== "3018" ~ 1,
# # .x== "30181" ~ 1,
# # .x== "30182" ~ 1,
# # .x== "30183" ~ 1,
# # .x== "30184" ~ 1,
# # .x== "30189" ~ 1,
# # .x== "3019" ~ 1,
# .x== "3079" ~ 1,
# .x== "3123" ~ 1,
#
# TRUE ~ 0), .names = "derivde{.col}")))

# ICD9_0 <- (MSP_clean %>%
# mutate(across(starts_with("diag_cd_"), ~case_when(
# .x== "317" ~ 1,
# .x== "318" ~ 1,
# .x== "3180" ~ 1,
# .x== "3181" ~ 1,
# .x== "3182" ~ 1,
# .x== "319" ~ 1,
#
#
#
#
# TRUE ~ 0), .names = "derivde{.col}")))

# ICD9_0 <- (MSP_clean %>%
# mutate(across(starts_with("diag_cd_"), ~case_when(
# .x== "299" ~ 1,
# .x== "2990" ~ 1,
# .x== "29900" ~ 1,
# .x== "29901" ~ 1,
# .x== "2991" ~ 1,
# .x== "29910" ~ 1,
# .x== "29911" ~ 1,
# .x== "2998" ~ 1,
# .x== "29990" ~ 1,
# .x== "29981" ~ 1,
# .x== "2999" ~ 1,
# .x== "29990" ~ 1,
# .x== "29991" ~ 1,
# .x== "315" ~ 1,
# .x== "3150" ~ 1,
# .x== "31500" ~ 1,
# .x== "31501" ~ 1,
# .x== "31502" ~ 1,
# .x== "31509" ~ 1,
# .x== "3151" ~ 1,
# .x== "31532" ~ 1,
# .x== "31534" ~ 1,
# .x== "31535" ~ 1,
# .x== "31539" ~ 1,
# .x== "3154" ~ 1,
# .x== "3155" ~ 1,
# .x== "3158" ~ 1,
# .x== "3159" ~ 1,
#
#
#
#
#
# TRUE ~ 0), .names = "derivde{.col}")))

# ICD9_0 <- (MSP_clean %>%
# mutate(across(starts_with("diag_cd_"), ~case_when(
# (.x >= 3070) & (.x <= 3076) ~ 1,
# (.x >= 31200) & (.x <= 31401) ~ 1,
# (.x >= 3120) & (.x <= 3149) ~ 1,
# # .x== "3070"~ 1,
# # .x== "3072" ~ 1,
# # .x== "3073" ~ 1,
# # .x== "3077" ~ 1,
# # .x== "3076" ~ 1,
# .x== "312" ~ 1,
# # .x== "3120" ~ 1,
# # .x== "31200" ~ 1,
# # .x== "31201" ~ 1,
# # .x== "31202" ~ 1,
# # .x== "31203" ~ 1,
# # .x== "3121" ~ 1,
# # .x== "31210" ~ 1,
# # .x== "31211" ~ 1,
# # .x== "31212" ~ 1,
# # .x== "31213" ~ 1,
# # .x== "3122" ~ 1,
# # .x== "31220" ~ 1,
# # .x== "31221" ~ 1,
# # .x== "31222" ~ 1,
# # .x== "31223" ~ 1,
# # .x== "3123" ~ 1,
# # .x== "31230" ~ 1,
# # .x== "31231" ~ 1,
# # .x== "31232" ~ 1,
# # .x== "31233" ~ 1,
# # .x== "31234" ~ 1,
# # .x== "31235" ~ 1,
# # .x== "31239" ~ 1,
# # .x== "3124" ~ 1,
# # .x== "3128" ~ 1,
# # .x== "31281" ~ 1,
# # .x== "31282" ~ 1,
# # .x== "31289" ~ 1,
# # .x== "3129" ~ 1,
# # .x== "3130" ~ 1,
# # .x== "31300" ~ 1,
# # .x== "31301" ~ 1,
# # .x== "31302" ~ 1,
# # .x== "31321" ~ 1,
# # .x== "31322" ~ 1,
# # .x== "31323" ~ 1,
# # .x== "3133" ~ 1,
# # .x== "3138" ~ 1,
# # .x== "31381" ~ 1,
# # .x== "31382" ~ 1,
# # .x== "31383" ~ 1,
# # .x== "31389" ~ 1,
# # .x== "3138" ~ 1,
# .x== "314" ~ 1,
# # .x== "3140" ~ 1,
# # .x== "31400" ~ 1,
# # .x== "31401" ~ 1,
# # .x== "3141" ~ 1,
# # .x== "3142" ~ 1,
# # .x== "3148" ~ 1,
# # .x== "3149" ~ 1,
#
#
#
#
#
#
# TRUE ~ 0), .names = "derivde{.col}")))

# ICD9_0 <- (MSP_clean %>%
# mutate(across(starts_with("diag_cd_"), ~case_when(
# .x=="50B"~ 1,
#
#
# TRUE ~ 0), .names = "derivde{.col}")))

# ICD9_0 <- (MSP_clean %>%
# mutate(across(starts_with("diag_cd_"), ~case_when(
# .x=="291"~ 1,
# (.x >= 2910) & (.x <= 2919) ~ 1,
# # .x=="2910"~ 1,
# # .x=="2911"~ 1,
# # .x=="2912"~ 1,
# # .x=="2913"~ 1,
# # .x=="2914"~ 1,
# # .x=="2915"~ 1,
# # .x=="2918"~ 1,
# .x=="29181"~ 1,
# .x=="29189"~ 1,
# # .x=="2919"~ 1,
# .x=="303"~ 1,
# .x=="3030"~ 1,
# (.x >= 30301) & (.x <= 30393) ~ 1,
# # .x=="30301"~ 1,
# # .x=="30302"~ 1,
# # .x=="30303"~ 1,
# .x=="3039"~ 1,
# .x=="3090"~ 1,
# # .x=="30391"~ 1,
# # .x=="30392"~ 1,
# # .x=="30393"~ 1,
# .x=="305"~ 1,
# .x=="3050"~ 1,
# (.x >= 30500) & (.x <= 53531) ~ 1,
# # .x=="30500"~ 1,
# # .x=="30501"~ 1,
# # .x=="30502"~ 1,
# # .x=="30503"~ 1,
# .x=="3575"~ 1,
# .x=="4255"~ 1,
# # .x=="53530"~ 1,
# # .x=="53531"~ 1,
# .x=="5710"~ 1,
# .x=="5711"~ 1,
# .x=="5712"~ 1,
# .x=="5713"~ 1,
# .x=="E8600"~ 1,
#
#
#
#
#
#
# TRUE ~ 0), .names = "derivde{.col}")))

# ICD9_0 <- (MSP_clean %>%
# mutate(across(starts_with("diag_cd_"), ~case_when(
# .x=="0400"~ 1,
# .x=="3040"~ 1,
# (.x >= 30401) & (.x <= 30473) ~ 1,
# (.x >= 30550) & (.x <= 30553) ~ 1,
# (.x >= 96500) & (.x <= 96509) ~ 1,
# # .x=="30401"~ 1,
# # .x=="30402"~ 1,
# # .x=="30403"~ 1,
# # .x=="30470"~ 1,
# # .x=="30471"~ 1,
# # .x=="30472"~ 1,
# # .x=="30473"~ 1,
# # .x=="30550"~ 1,
# # .x=="30551"~ 1,
# # .x=="30552"~ 1,
# # .x=="30553"~ 1,
# # .x=="96500"~ 1,
# # .x=="96501"~ 1,
# # .x=="96502"~ 1,
# # .x=="96509"~ 1,
# .x=="9701"~ 1,
# .x=="E8500"~ 1,
# .x=="E8501"~ 1,
# .x=="E8502"~ 1,
# .x=="E9350"~ 1,
# .x=="E9351"~ 1,
# .x=="E9352"~ 1,
# .x=="E9401"~ 1,
#
#
#
#
#
#
#
#
#
#
# TRUE ~ 0), .names = "derivde{.col}")))

# ICD9_0 <- (MSP_clean %>%
# mutate(across(starts_with("diag_cd_"), ~case_when(
# .x=="3043"~ 1,
# .x=="30430"~ 1,
# .x=="30431"~ 1,
# .x=="30432"~ 1,
# .x=="30433"~ 1,
# .x=="3052"~ 1,
# .x=="30520"~ 1,
# .x=="30521"~ 1,
# .x=="30522"~ 1,
# .x=="30523"~ 1,
#
#
#
#
#
#
#
#
#
# TRUE ~ 0), .names = "derivde{.col}")))

# ICD9_0 <- (MSP_clean %>%
# mutate(across(starts_with("diag_cd_"), ~case_when(
# .x=="3041"~ 1,
# .x=="30410"~ 1,
# .x=="30411"~ 1,
# .x=="30412"~ 1,
# .x=="30413"~ 1,
# .x=="3054"~ 1,
# .x=="30540"~ 1,
# .x=="30541"~ 1,
# .x=="30542"~ 1,
# .x=="30543"~ 1,
#
#
#
#
#
#
#
#
#
# TRUE ~ 0), .names = "derivde{.col}")))

# ICD9_0 <- (MSP_clean %>%
# mutate(across(starts_with("diag_cd_"), ~case_when(
# .x=="3042"~ 1,
# .x=="30420"~ 1,
# .x=="30421"~ 1,
# .x=="30422"~ 1,
# .x=="30423"~ 1,
# .x=="3056"~ 1,
# .x=="30560"~ 1,
# .x=="30561"~ 1,
# .x=="30562"~ 1,
# .x=="30563"~ 1,
# .x=="9685"~ 1,
# .x=="E9385"~ 1,
#
#
#
#
#
#
#
#
#
# TRUE ~ 0), .names = "derivde{.col}")))

# ICD9_0 <- (MSP_clean %>%
# mutate(across(starts_with("diag_cd_"), ~case_when(
# .x=="3044"~ 1,
# .x=="30440"~ 1,
# .x=="30441"~ 1,
# .x=="30442"~ 1,
# .x=="30443"~ 1,
# .x=="3057"~ 1,
# .x=="30570"~ 1,
# .x=="30571"~ 1,
# .x=="30572"~ 1,
# .x=="30573"~ 1,
#
#
#
#
# TRUE ~ 0), .names = "derivde{.col}")))

# ICD9_0 <- (MSP_clean %>%
# mutate(across(starts_with("diag_cd_"), ~case_when(
# .x=="3045"~ 1,
# .x=="30450"~ 1,
# .x=="30451"~ 1,
# .x=="30452"~ 1,
# .x=="30453"~ 1,
# .x=="3053"~ 1,
# .x=="30530"~ 1,
# .x=="30531"~ 1,
# .x=="30532"~ 1,
# .x=="30533"~ 1,
# .x=="9696"~ 1,
# .x=="E9396"~ 1,
# .x=="E8541"~ 1,
#
#
#
#
# TRUE ~ 0), .names = "derivde{.col}")))

# ICD9_0 <- (MSP_clean %>%
# mutate(across(starts_with("diag_cd_"), ~case_when(
# .x=="3051"~ 1,
# .x=="V1582"~ 1,
#
# TRUE ~ 0), .names = "derivde{.col}")))

# ICD9_0 <- (MSP_clean %>%
# mutate(across(starts_with("diag_cd_"), ~case_when(
# (.x >= 64830) & (.x <= 64834) ~ 1,
# .x=="6483"~ 1,
# # .x=="64830"~ 1,
# # .x=="64831"~ 1,
# # .x=="64832"~ 1,
# # .x=="64833"~ 1,
# # .x=="64834"~ 1,
# .x=="3046"~ 1,
# (.x >= 30461) & (.x <= 30463) ~ 1,
# .x=="3059"~ 1,
# (.x >= 30591) & (.x <= 30593) ~ 1,
#
# TRUE ~ 0), .names = "derivde{.col}")))

# ICD9_0 <- (MSP_clean %>%
# mutate(across(starts_with("diag_cd_"), ~case_when(
# (.x >= 30491) & (.x <= 30493) ~ 1,
# (.x >= 30581) & (.x <= 30583) ~ 1,
# (.x >= 30591) & (.x <= 30592) ~ 1,
# (.x >= 3045) & (.x <= 3049) ~ 1,
# (.x >= 3053) & (.x <= 3059) ~ 1,
# .x=="292"~ 1,
# .x=="6483"~ 1,
# .x=="7960"~ 1,
# .x=="9621"~ 1,
#
#
# TRUE ~ 0), .names = "derivde{.col}")))
#
#
#
# ICD9_00 <- (MSP_clean %>%
# mutate(across(starts_with("diag_cd_"), ~case_when(
#
# .x=="9658"~ 1,
# .x=="9663"~ 1,
# .x=="9664"~ 1,
# .x=="9670"~ 1,
# .x=="9684"~ 1,
# .x=="9685"~ 1,
# (.x >= 9696) & (.x <= 9699) ~ 1,
# .x=="970"~ 1,
#
#
# TRUE ~ 0), .names = "derivde{.col}")))

# icd9_1 <- ICD9_0 %>%
# group_by(moh_study_id) %>%
# summarize(derivdediag_cd_1 = sum(derivdediag_cd_1),
# derivdediag_cd_2 = sum(derivdediag_cd_2),
# derivdediag_cd_3 = sum(derivdediag_cd_3))
#
#
# icd9_11 <- ICD9_00 %>%
# group_by(moh_study_id) %>%
# summarize(derivdediag_cd_1 = sum(derivdediag_cd_1),
# derivdediag_cd_2 = sum(derivdediag_cd_2),
# derivdediag_cd_3 = sum(derivdediag_cd_3))
#
# icd9_2 <- icd9_1 %>%
# mutate(Total = select(., -moh_study_id) %>%
# rowSums(na.rm = TRUE))
#
# icd9_22 <- icd9_11 %>%
# mutate(Total1 = select(., -moh_study_id) %>%
# rowSums(na.rm = TRUE))
#
# icd9_222 <- merge(x=icd9_2, y= icd9_22, by="moh_study_id", all=TRUE)
#
#
# icd9_2222 <- icd9_222 %>%
# mutate(Total3 = Total + Total1)

# icd9_continous <- icd9_2222 %>%
# mutate(Polysubstance = Total3) %>%
# select(moh_study_id, Polysubstance)
#
# icd9_3 <- icd9_2222 %>%
# mutate(Polysubstance = if_else(Total3 >= 1, 1, 0))
#
# icd9_binary <- icd9_3 %>%
# select(moh_study_id, Polysubstance)
#
#
# table(icd9_continous$Polysubstance)
# table(icd9_binary$Polysubstance)
#
# write.csv(icd9_continous, "Icd9_Polysubstance_C.csv", row.names = FALSE)
# write.csv(icd9_binary, "Icd9_Polysubstance_B.csv", row.names = FALSE)

# icd9_1 <- ICD9_0 %>%
# group_by(moh_study_id) %>%
# summarize(derivdediag_cd_1 = sum(derivdediag_cd_1),
# derivdediag_cd_2 = sum(derivdediag_cd_2),
# derivdediag_cd_3 = sum(derivdediag_cd_3))
#
# icd9_2 <- icd9_1 %>%
# mutate(Total = select(., -moh_study_id) %>%
# rowSums(na.rm = TRUE))
#
#
# icd9_continous <- icd9_2 %>%
# mutate(Polysubstance = Total) %>%
# select(moh_study_id, Polysubstance)
#
# icd9_3 <- icd9_2 %>%
# mutate(Polysubstance = if_else(Total >= 1, 1, 0))
#
# icd9_binary <- icd9_3 %>%
# select(moh_study_id, Polysubstance)
#
#
# table(icd9_continous$Polysubstance)
# table(icd9_binary$Polysubstance)
#
# write.csv(icd9_continous, "Icd9_Polysubstance_C.csv", row.names = FALSE)
# write.csv(icd9_binary, "Icd9_Polysubstance_B.csv", row.names = FALSE)

# table(Icd9_cocaine_B$cocaine)
# table(Icd9_opiates_B$opiates)

Icd Code 10

library(tidyverse)

## -- Attaching core tidyverse packages ------------------------ tidyverse 2.0.0 --
## v dplyr 1.1.2 v readr 2.1.4
## v forcats 1.0.0 v stringr 1.5.0
## v ggplot2 3.4.2 v tibble 3.2.1
## v lubridate 1.9.2 v tidyr 1.3.0
## v purrr 1.0.1
## -- Conflicts ------------------------------------------ tidyverse_conflicts() --
## x dplyr::filter() masks stats::filter()
## x dplyr::lag() masks stats::lag()
## i Use the conflicted package (<http://conflicted.r-lib.org/>) to force all conflicts to become errors

library(dplyr)
library(gapminder)
library(caret)

## Loading required package: lattice
##
## Attaching package: 'caret'
##
## The following object is masked from 'package:purrr':
##
## lift

library(xgboost)

##
## Attaching package: 'xgboost'
##
## The following object is masked from 'package:dplyr':
##
## slice

library(forcats)
library(mice)

##
## Attaching package: 'mice'
##
## The following object is masked from 'package:stats':
##
## filter
##
## The following objects are masked from 'package:base':
##
## cbind, rbind

library(vctrs)

##
## Attaching package: 'vctrs'
##
## The following object is masked from 'package:dplyr':
##
## data_frame
##
## The following object is masked from 'package:tibble':
##
## data_frame

###Data descriptive

vw_dad <- read_csv("U:/Andy's Thesis/Raw_data_used/vw_dad.csv" , show_col_types = FALSE)

## Warning: One or more parsing issues, call `problems()` on your data frame for details,
## e.g.:
## dat <- vroom(...)
## problems(dat)

glimpse(vw_dad)

## Rows: 1,663,940
## Columns: 141

###Template

# ICD10_0 <- (vw_dad %>%
# mutate(across(starts_with("diagx_"), ~case_when(
# .x=="E8500"~ 1,
# .x== "3040" ~ 1,
# .x== "3047" ~ 1,
# .x=="3055"~ 1,
# .x== "9650" ~ 1,
#
#
# TRUE ~ 0), .names = "derivde{.col}")))

# ICD10_00 <- (vw_dad %>%
# mutate(across(starts_with("diagx_"), ~case_when(
# (.x >= 301) & (.x <= 301.9) ~ 1,
#
#
# TRUE ~ 0), .names = "derivde{.col}")))

# ICD10_0 <- (vw_dad %>%
# mutate(across(starts_with("diagx_"), ~case_when(
# grepl("F10", .) ~ 1,
# TRUE ~ 0), .names = "derived{.col}")))

###start extracting ICD10

# ICD10_0 <- (vw_dad %>%
# mutate(across(starts_with("diagx_"), ~case_when(
# grepl("B376", .) ~ 1,
# grepl("I33", .) ~ 1,
# grepl("I34", .) ~ 1,
# grepl("I35", .) ~ 1,
# grepl("I36", .) ~ 1,
# grepl("I37", .) ~ 1,
# grepl("I38", .) ~ 1,
# grepl("I39", .) ~ 1,
#
# TRUE ~ 0), .names = "derived{.col}")))

# ICD10_0 <- (vw_dad %>%
# mutate(across(starts_with("diagx_"), ~case_when(
# grepl("A40", .) ~ 1,
# grepl("A41", .) ~ 1,
# grepl("I269", .) ~ 1,
# grepl("I400", .) ~ 1,
# grepl("R572", .) ~ 1,
# grepl("R651", .) ~ 1,
# grepl("R659", .) ~ 1,
#
# TRUE ~ 0), .names = "derived{.col}")))

# ICD10_0 <- (vw_dad %>%
# mutate(across(starts_with("diagx_"), ~case_when(
# grepl("M86", .) ~ 1,
# grepl("M899", .) ~ 1,
#
# TRUE ~ 0), .names = "derived{.col}")))

# ICD10_0 <- (vw_dad %>%
# mutate(across(starts_with("diagx_"), ~case_when(
# grepl("I80", .) ~ 1,
# grepl("L97", .) ~ 1,
# grepl("L988", .) ~ 1,
# grepl("M793", .) ~ 1,
# grepl("A480", .) ~ 1,
# grepl("G06", .) ~ 1,
# grepl("G09", .) ~ 1,
# grepl("K630", .) ~ 1,
# grepl("K650", .) ~ 1,
# grepl("K750", .) ~ 1,
# grepl("L02", .) ~ 1,
# grepl("L03", .) ~ 1,
# grepl("M5402", .) ~ 1,
# grepl("M726", .) ~ 1,
# grepl("N10", .) ~ 1,
# grepl("R02", .) ~ 1,
#
#
# TRUE ~ 0), .names = "derived{.col}")))

# ICD10_0 <- (vw_dad %>%
# mutate(across(starts_with("diagx_"), ~case_when(
# grepl("F00", .) ~ 1,
# grepl("F01", .) ~ 1,
# grepl("F02", .) ~ 1,
# grepl("F03", .) ~ 1,
# grepl("F04", .) ~ 1,
# grepl("F05", .) ~ 1,
# grepl("F06", .) ~ 1,
# grepl("F07", .) ~ 1,
# grepl("F08", .) ~ 1,
# grepl("F09", .) ~ 1,
# grepl("G30", .) ~ 1,
#
#
# TRUE ~ 0), .names = "derived{.col}")))

#
# ICD10_0 <- (vw_dad %>%
# mutate(across(starts_with("diagx_"), ~case_when(
# grepl("F10", .) ~ 1,
# grepl("F11", .) ~ 1,
# grepl("F12", .) ~ 1,
# grepl("F13", .) ~ 1,
# grepl("F14", .) ~ 1,
# grepl("F15", .) ~ 1,
# grepl("F16", .) ~ 1,
# grepl("F17", .) ~ 1,
# grepl("F18", .) ~ 1,
# grepl("F19", .) ~ 1,
# grepl("F55", .) ~ 1,
# grepl("T40", .) ~ 1,
#
#
#
# TRUE ~ 0), .names = "derived{.col}")))

# ICD10_0 <- (vw_dad %>%
# mutate(across(starts_with("diagx_"), ~case_when(
# grepl("F20", .) ~ 1,
# grepl("F21", .) ~ 1,
# grepl("F22", .) ~ 1,
# grepl("F23", .) ~ 1,
# grepl("F24", .) ~ 1,
# grepl("F25", .) ~ 1,
# grepl("F26", .) ~ 1,
# grepl("F27", .) ~ 1,
# grepl("F28", .) ~ 1,
# grepl("F29", .) ~ 1,
#
#
# TRUE ~ 0), .names = "derived{.col}")))

# ICD10_0 <- (vw_dad %>%
# mutate(across(starts_with("diagx_"), ~case_when(
# grepl("F30", .) ~ 1,
# grepl("F31", .) ~ 1,
# grepl("F32", .) ~ 1,
# grepl("F33", .) ~ 1,
# grepl("F34", .) ~ 1,
# grepl("F35", .) ~ 1,
# grepl("F36", .) ~ 1,
# grepl("F37", .) ~ 1,
# grepl("F38", .) ~ 1,
# grepl("F39", .) ~ 1,
#
#
# TRUE ~ 0), .names = "derived{.col}")))

# ICD10_0 <- (vw_dad %>%
# mutate(across(starts_with("diagx_"), ~case_when(
# grepl("F40", .) ~ 1,
# grepl("F41", .) ~ 1,
# grepl("F42", .) ~ 1,
# grepl("F43", .) ~ 1,
# grepl("F44", .) ~ 1,
# grepl("F45", .) ~ 1,
# grepl("F46", .) ~ 1,
# grepl("F47", .) ~ 1,
# grepl("F48", .) ~ 1,
#
#
# TRUE ~ 0), .names = "derived{.col}")))

# ICD10_0 <- (vw_dad %>%
# mutate(across(starts_with("diagx_"), ~case_when(
# grepl("F50", .) ~ 1,
# grepl("F51", .) ~ 1,
# grepl("F52", .) ~ 1,
# grepl("F53", .) ~ 1,
# grepl("F54", .) ~ 1,
# grepl("F55", .) ~ 1,
# grepl("F56", .) ~ 1,
# grepl("F57", .) ~ 1,
# grepl("F58", .) ~ 1,
# grepl("F59", .) ~ 1,
#
#
# TRUE ~ 0), .names = "derived{.col}")))

# ICD10_0 <- (vw_dad %>%
# mutate(across(starts_with("diagx_"), ~case_when(
# grepl("F60", .) ~ 1,
# grepl("F61", .) ~ 1,
# grepl("F62", .) ~ 1,
# grepl("F63", .) ~ 1,
# grepl("F64", .) ~ 1,
# grepl("F65", .) ~ 1,
# grepl("F66", .) ~ 1,
# grepl("F67", .) ~ 1,
# grepl("F68", .) ~ 1,
# grepl("F69", .) ~ 1,
#
#
# TRUE ~ 0), .names = "derived{.col}")))

# ICD10_0 <- (vw_dad %>%
# mutate(across(starts_with("diagx_"), ~case_when(
# grepl("F70", .) ~ 1,
# grepl("F71", .) ~ 1,
# grepl("F72", .) ~ 1,
# grepl("F73", .) ~ 1,
# grepl("F74", .) ~ 1,
# grepl("F75", .) ~ 1,
# grepl("F76", .) ~ 1,
# grepl("F77", .) ~ 1,
# grepl("F78", .) ~ 1,
# grepl("F79", .) ~ 1,
#
#
# TRUE ~ 0), .names = "derived{.col}")))

# ICD10_0 <- (vw_dad %>%
# mutate(across(starts_with("diagx_"), ~case_when(
# grepl("F80", .) ~ 1,
# grepl("F81", .) ~ 1,
# grepl("F82", .) ~ 1,
# grepl("F83", .) ~ 1,
# grepl("F84", .) ~ 1,
# grepl("F85", .) ~ 1,
# grepl("F86", .) ~ 1,
# grepl("F87", .) ~ 1,
# grepl("F88", .) ~ 1,
# grepl("F89", .) ~ 1,
#
#
# TRUE ~ 0), .names = "derived{.col}")))

# ICD10_0 <- (vw_dad %>%
# mutate(across(starts_with("diagx_"), ~case_when(
# grepl("F90", .) ~ 1,
# grepl("F91", .) ~ 1,
# grepl("F92", .) ~ 1,
# grepl("F93", .) ~ 1,
# grepl("F94", .) ~ 1,
# grepl("F95", .) ~ 1,
# grepl("F96", .) ~ 1,
# grepl("F97", .) ~ 1,
# grepl("F98", .) ~ 1,
# grepl("F99", .) ~ 1,
#
#
# TRUE ~ 0), .names = "derived{.col}")))

# ICD10_0 <- (vw_dad %>%
# mutate(across(starts_with("diagx_"), ~case_when(
# grepl("F99", .) ~ 1,
#
#
# TRUE ~ 0), .names = "derived{.col}")))

# ICD10_0 <- (vw_dad %>%
# mutate(across(starts_with("diagx_"), ~case_when(
# grepl("F10", .) ~ 1,
#
#
# TRUE ~ 0), .names = "derived{.col}")))

# ICD10_0 <- (vw_dad %>%
# mutate(across(starts_with("diagx_"), ~case_when(
# grepl("F11", .) ~ 1,
# grepl("T400", .) ~ 1,
# grepl("T401", .) ~ 1,
# grepl("T402", .) ~ 1,
# grepl("T403", .) ~ 1,
# grepl("Z79891", .) ~ 1,
#
#
# TRUE ~ 0), .names = "derived{.col}")))

# ICD10_0 <- (vw_dad %>%
# mutate(across(starts_with("diagx_"), ~case_when(
# grepl("F12", .) ~ 1,
# grepl("T407", .) ~ 1,
#
# TRUE ~ 0), .names = "derived{.col}")))

# ICD10_0 <- (vw_dad %>%
# mutate(across(starts_with("diagx_"), ~case_when(
# grepl("F13", .) ~ 1,
#
# TRUE ~ 0), .names = "derived{.col}")))

# ICD10_0 <- (vw_dad %>%
# mutate(across(starts_with("diagx_"), ~case_when(
# grepl("F14", .) ~ 1,
# grepl("T405", .) ~ 1,
#
# TRUE ~ 0), .names = "derived{.col}")))

# ICD10_0 <- (vw_dad %>%
# mutate(across(starts_with("diagx_"), ~case_when(
# grepl("F15", .) ~ 1,
#
# TRUE ~ 0), .names = "derived{.col}")))

# ICD10_0 <- (vw_dad %>%
# mutate(across(starts_with("diagx_"), ~case_when(
# grepl("F16", .) ~ 1,
# grepl("T408", .) ~ 1,
#
# TRUE ~ 0), .names = "derived{.col}")))

# ICD10_0 <- (vw_dad %>%
# mutate(across(starts_with("diagx_"), ~case_when(
# grepl("F17", .) ~ 1,
#
# TRUE ~ 0), .names = "derived{.col}")))

# ICD10_0 <- (vw_dad %>%
# mutate(across(starts_with("diagx_"), ~case_when(
# grepl("F18", .) ~ 1,
#
# TRUE ~ 0), .names = "derived{.col}")))

# ICD10_0 <- (vw_dad %>%
# mutate(across(starts_with("diagx_"), ~case_when(
# grepl("V6542", .) ~ 1,
# grepl("F19", .) ~ 1,
# grepl("Z715", .) ~ 1,
# grepl("Z503", .) ~ 1,
# grepl("T42", .) ~ 1,
# grepl("T387", .) ~ 1,
# grepl("T408", .) ~ 1,
# grepl("T409", .) ~ 1,
# grepl("T412", .) ~ 1,
# grepl("T436", .) ~ 1,
# grepl("T437", .) ~ 1,
# grepl("T438", .) ~ 1,
# grepl("T439", .) ~ 1,
# grepl("T507", .) ~ 1,
#
#
# TRUE ~ 0), .names = "derived{.col}")))

# ICD10_1 <- (ICD10_0 %>%
# select(moh_study_id, starts_with("derived")))
#
# ICD10_2 <- (ICD10_1 %>%
# group_by(moh_study_id) %>%
# summarize(deriveddiagx_1 = sum(deriveddiagx_1),
# deriveddiagx_2 = sum(deriveddiagx_2),
# deriveddiagx_3 = sum(deriveddiagx_3),
# deriveddiagx_4 = sum(deriveddiagx_4),
# deriveddiagx_5 = sum(deriveddiagx_5),
# deriveddiagx_6 = sum(deriveddiagx_6),
# deriveddiagx_7 = sum(deriveddiagx_7),
# deriveddiagx_8 = sum(deriveddiagx_8),
# deriveddiagx_9 = sum(deriveddiagx_9),
# deriveddiagx_10 = sum(deriveddiagx_10),
# deriveddiagx_11 = sum(deriveddiagx_11),
# deriveddiagx_12 = sum(deriveddiagx_12),
# deriveddiagx_13 = sum(deriveddiagx_13),
# deriveddiagx_14 = sum(deriveddiagx_14),
# deriveddiagx_15 = sum(deriveddiagx_15),
# deriveddiagx_16 = sum(deriveddiagx_16),
# deriveddiagx_17 = sum(deriveddiagx_17),
# deriveddiagx_18 = sum(deriveddiagx_18),
# deriveddiagx_19 = sum(deriveddiagx_19),
# deriveddiagx_20 = sum(deriveddiagx_20),
# deriveddiagx_21 = sum(deriveddiagx_21),
# deriveddiagx_22 = sum(deriveddiagx_22),
# deriveddiagx_23 = sum(deriveddiagx_23),
# deriveddiagx_24 = sum(deriveddiagx_24),
# deriveddiagx_25 = sum(deriveddiagx_25)))
#
#
# ICD10_3 <- ICD10_2 %>%
# mutate(Total = select(., -moh_study_id) %>% rowSums(na.rm = TRUE))
#
# icd10_continous <- ICD10_3 %>%
# mutate(Tobaccouse = Total) %>%
# select(moh_study_id, Tobaccouse)
#
# ICD10_4 <- ICD10_3 %>%
# mutate(Tobaccouse = if_else( Total >= 1, 1, 0))
#
# icd10_binary <- ICD10_4 %>%
# select(moh_study_id, Tobaccouse)
#
# table(icd10_continous$Tobaccouse)
# table(icd10_binary$Tobaccouse)
#
# write.csv(icd10_continous, "Icd10_Tobaccouse_C.csv", row.names = FALSE)
# write.csv(icd10_binary, "Icd10_Tobaccouse_B.csv", row.names = FALSE)

Pharmanet

# Pharmanetspss <- read_csv("U:/Andy's Thesis/Raw_data_used/Pharmanetspss.csv" , show_col_types = FALSE)

# glimpse(Pharmanetspss)

###OST/OAT

# dinpin <- (Pharmanetspss %>%
# mutate(across(starts_with("din_pin"), ~case_when(
# .x=="2242963"~ 1,
# .x=="2242964"~ 1,
# .x=="2295695"~ 1,
# .x=="2295709"~ 1,
# .x=="2408104"~ 1,
# .x=="2424851"~ 1,
# .x=="2424878"~ 1,
# .x=="999776"~ 1,
# .x=="665619"~ 1,
# .x=="655627"~ 1,
# .x=="781460"~ 1,
# .x=="781479"~ 1,
# .x=="2408090"~ 1,
# (.x >= 999792) & (.x <= 999793) ~ 1,
# (.x >= 66999990) & (.x <= 66999993) ~ 1,
# (.x >= 66999990) & (.x <= 66999993) ~ 1,
# (.x >= 66999997) & (.x <= 66999999) ~ 1,
# (.x >= 67000000) & (.x <= 67000004) ~ 1,
# (.x >= 22123346) & (.x <= 22123349) ~ 1,
# TRUE ~ 0), .names = "derivde{.col}")))

# dinpin_1 <- dinpin %>%
# rename(ost = derivdedin_pin) %>%
# select(moh_study_id, oat, ost)

# write.csv(dinpin_1, "Pharmanetdinpin.csv", row.names = FALSE)

Combining Icd files

# Tobaccouse1 <- left_join(Icd9_Tobaccouse_B, Icd10_Tobaccouse_B, by="moh_study_id") %>%
# mutate_at(c(3), ~replace_na(.,0))
#
# Tobaccouse <- Tobaccouse1 %>%
# mutate(Tobaccouse = Tobaccouse.x + Tobaccouse.y) %>%
# mutate(Tobaccouse = if_else(Tobaccouse >= 1, 1, 0)) %>%
# select(moh_study_id, Tobaccouse)
#
# write.csv(Tobaccouse, "Tobaccouse.csv", row.names = FALSE)
#
# table(Tobaccouse$Tobaccouse)

# Mooddisorders1 <- left_join(Icd9_Mooddisorders_B, Icd10_Mooddisorders_B, by="moh_study_id") %>%
# mutate_at(c(3), ~replace_na(.,0))
#
# Mooddisorders <- Mooddisorders1 %>%
# mutate(Mooddisorders = Mooddisorders.x + Mooddisorders.y) %>%
# mutate(Mooddisorders = if_else(Mooddisorders >= 1, 1, 0)) %>%
# select(moh_study_id, Mooddisorders)
#
# write.csv(Mooddisorders, "Mooddisorders.csv", row.names = FALSE)
#
# table(Mooddisorders$Mooddisorders)

#
# Tissueinfection1 <- left_join(Icd9_Tissueinfection_B, Icd10_Tissueinfection_B, by="moh_study_id") %>%
# mutate_at(c(3), ~replace_na(.,0))
#
# Tissueinfection <- Tissueinfection1 %>%
# mutate(Tissueinfection = Tissueinfection.x + Tissueinfection.y) %>%
# mutate(Tissueinfection = if_else(Tissueinfection >= 1, 1, 0)) %>%
# select(moh_study_id, Tissueinfection)
#
# write.csv(Tissueinfection, "Tissueinfection.csv", row.names = FALSE)
#
# table(Tissueinfection$Tissueinfection)

#
# substancerelateddisorders <- left_join(Icd9_substancerelateddisorders_B, Icd10_substancerelateddisorders_B, by="moh_study_id") %>%
# mutate_at(c(3), ~replace_na(.,0))
#
# substancerelateddisorders <- substancerelateddisorders %>%
# mutate(substancerelateddisorders = substancerelateddisorders.x + substancerelateddisorders.y) %>%
# mutate(substancerelateddisorders = if_else(substancerelateddisorders >= 1, 1, 0)) %>%
# select(moh_study_id, substancerelateddisorders)
#
# write.csv(substancerelateddisorders, "substancerelateddisorders.csv", row.names = FALSE)
#
#
# table(substancerelateddisorders$substancerelateddisorders)

#
# ICDderivedvariables$resutls = ifelse(ICDderivedvariables$substancerelateddisorders.x > ICDderivedvariables$substancerelateddisorders.y, "column1",
# ifelse(ICDderivedvariables$substancerelateddisorders.x < ICDderivedvariables$substancerelateddisorders.y, 'Column2', 'None' ))
#
# table(ICDderivedvariables$resutls)

#
# Stimulantuse1 <- left_join(Icd9_Stimulantuse_B, Icd10_Stimulantuse_B, by="moh_study_id") %>%
# mutate_at(c(3), ~replace_na(.,0))
#
# Stimulantuse <- Stimulantuse1 %>%
# mutate(Stimulantuse = Stimulantuse.x + Stimulantuse.y) %>%
# mutate(Stimulantuse = if_else(Stimulantuse >= 1, 1, 0)) %>%
# select(moh_study_id, Stimulantuse)
#
# write.csv(Stimulantuse, "Stimulantuse.csv", row.names = FALSE)
#
# table(Stimulantuse$Stimulantuse)
#
# length(unique(Stimulantuse$moh_study_id)) == nrow(Stimulantuse)

# Sepsis1 <- left_join(Icd9_Sepsis_B, Icd10_Sepsis_B, by="moh_study_id") %>%
# mutate_at(c(3), ~replace_na(.,0))
#
# Sepsis <- Sepsis1 %>%
# mutate(Sepsis = Sepsis.x + Sepsis.y) %>%
# mutate(Sepsis = if_else(Sepsis >= 1, 1, 0)) %>%
# select(moh_study_id, Sepsis)
#
# write.csv(Sepsis, "Sepsis.csv", row.names = FALSE)
#
# table(Sepsis$Sepsis)
#
# length(unique(Sepsis$moh_study_id)) == nrow(Sepsis)

# Sedativeandhypnoticuse1 <- left_join(Icd9_Sedativeandhypnoticuse_B, Icd10_Sedativeandhypnoticuse_B, by="moh_study_id") %>%
# mutate_at(c(3), ~replace_na(.,0))
#
# Sedativeandhypnoticuse <- Sedativeandhypnoticuse1 %>%
# mutate(Sedativeandhypnoticuse = Sedativeandhypnoticuse.x + Sedativeandhypnoticuse.y) %>%
# mutate(Sedativeandhypnoticuse = if_else(Sedativeandhypnoticuse >= 1, 1, 0)) %>%
# select(moh_study_id, Sedativeandhypnoticuse)
#
# write.csv(Sedativeandhypnoticuse, "Sedativeandhypnoticuse.csv", row.names = FALSE)
#
# table(Sedativeandhypnoticuse$Sedativeandhypnoticuse)
#
# length(unique(Sedativeandhypnoticuse$moh_study_id)) == nrow(Sedativeandhypnoticuse)

# psychoticdisorders1 <- left_join(Icd9_psychoticdisorders_B, Icd10_psychoticdisorders_B, by="moh_study_id") %>%
# mutate_at(c(3), ~replace_na(.,0))
#
# psychoticdisorders <- psychoticdisorders1 %>%
# mutate(psychoticdisorders = psychoticdisorders.x + psychoticdisorders.y) %>%
# mutate(psychoticdisorders = if_else(psychoticdisorders >= 1, 1, 0)) %>%
# select(moh_study_id, psychoticdisorders)
#
# write.csv(psychoticdisorders, "psychoticdisorders.csv", row.names = FALSE)
#
# table(psychoticdisorders$psychoticdisorders)
#
# length(unique(psychoticdisorders$moh_study_id)) == nrow(psychoticdisorders)

# Polysubstance1 <- left_join(Icd9_Polysubstance_B, Icd10_Polysubstance_B, by="moh_study_id") %>%
# mutate_at(c(3), ~replace_na(.,0))
#
# Polysubstance <- Polysubstance1 %>%
# mutate(Polysubstance = Polysubstance.x + Polysubstance.y) %>%
# mutate(Polysubstance = if_else(Polysubstance >= 1, 1, 0)) %>%
# select(moh_study_id, Polysubstance)
#
# write.csv(Polysubstance, "Polysubstance.csv", row.names = FALSE)
#
# table(Polysubstance$Polysubstance)
#
# length(unique(Polysubstance$moh_study_id)) == nrow(Polysubstance)

# Personalitydisorders1 <- left_join(Icd9_Personalitydisorders_B, Icd10_Personalitydisorders_B, by="moh_study_id") %>%
# mutate_at(c(3), ~replace_na(.,0))
#
# Personalitydisorders <- Personalitydisorders1 %>%
# mutate(Personalitydisorders = Personalitydisorders.x + Personalitydisorders.y) %>%
# mutate(Personalitydisorders = if_else(Personalitydisorders >= 1, 1, 0)) %>%
# select(moh_study_id, Personalitydisorders)
#
# write.csv(Personalitydisorders, "Personalitydisorders.csv", row.names = FALSE)
#
# table(Personalitydisorders$Personalitydisorders)
#
# length(unique(Personalitydisorders$moh_study_id)) == nrow(Personalitydisorders)

# Otherpsychoactivedruguse1 <- left_join(Icd9_Otherpsychoactivedruguse_B, Icd10_Otherpsychoactivedruguse_B, by="moh_study_id") %>%
# mutate_at(c(3), ~replace_na(.,0))
#
# Otherpsychoactivedruguse <- Otherpsychoactivedruguse1 %>%
# mutate(Otherpsychoactivedruguse = Otherpsychoactivedruguse.x + Otherpsychoactivedruguse.y) %>%
# mutate(Otherpsychoactivedruguse = if_else(Otherpsychoactivedruguse >= 1, 1, 0)) %>%
# select(moh_study_id, Otherpsychoactivedruguse)
#
# write.csv(Otherpsychoactivedruguse, "Otherpsychoactivedruguse.csv", row.names = FALSE)
#
# table(Otherpsychoactivedruguse$Otherpsychoactivedruguse)
#
# length(unique(Otherpsychoactivedruguse$moh_study_id)) == nrow(Otherpsychoactivedruguse)

# Osteomyelitis1 <- left_join(Icd9_Osteomyelitis_B, Icd10_Osteomyelitis_B, by="moh_study_id") %>%
# mutate_at(c(3), ~replace_na(.,0))
#
# Osteomyelitis <- Osteomyelitis1 %>%
# mutate(Osteomyelitis = Osteomyelitis.x + Osteomyelitis.y) %>%
# mutate(Osteomyelitis = if_else(Osteomyelitis >= 1, 1, 0)) %>%
# select(moh_study_id, Osteomyelitis)
#
# write.csv(Osteomyelitis, "Osteomyelitis.csv", row.names = FALSE)
#
# table(Osteomyelitis$Osteomyelitis)
#
# length(unique(Osteomyelitis$moh_study_id)) == nrow(Osteomyelitis)

# Opioiduse1 <- left_join(Icd9_Opioiduse_B, Icd10_Opioiduse_B, by="moh_study_id") %>%
# mutate_at(c(3), ~replace_na(.,0))
#
# Opioiduse <- Opioiduse1 %>%
# mutate(Opioiduse = Opioiduse.x + Opioiduse.y) %>%
# mutate(Opioiduse = if_else(Opioiduse >= 1, 1, 0)) %>%
# select(moh_study_id, Opioiduse)
#
# write.csv(Opioiduse, "Opioiduse.csv", row.names = FALSE)
#
# table(Opioiduse$Opioiduse)
#
# length(unique(Opioiduse$moh_study_id)) == nrow(Opioiduse)

# Neuroticrelateddisorders1 <- left_join(Icd9_Neuroticrelateddisorders_B, Icd10_Neuroticrelateddisorders_B, by="moh_study_id") %>%
# mutate_at(c(3), ~replace_na(.,0))
#
# Neuroticrelateddisorders <- Neuroticrelateddisorders1 %>%
# mutate(Neuroticrelateddisorders = Neuroticrelateddisorders.x + Neuroticrelateddisorders.y) %>%
# mutate(Neuroticrelateddisorders = if_else(Neuroticrelateddisorders >= 1, 1, 0)) %>%
# select(moh_study_id, Neuroticrelateddisorders)
#
# write.csv(Neuroticrelateddisorders, "Neuroticrelateddisorders.csv", row.names = FALSE)
#
# table(Neuroticrelateddisorders$Neuroticrelateddisorders)
#
# length(unique(Neuroticrelateddisorders$moh_study_id)) == nrow(Neuroticrelateddisorders)

# Neurocognitivedisorders1 <- left_join(Icd9_Neurocognitivedisorders_B, Icd10_Neurocognitivedisorders_B, by="moh_study_id") %>%
# mutate_at(c(3), ~replace_na(.,0))
#
# Neurocognitivedisorders <- Neurocognitivedisorders1 %>%
# mutate(Neurocognitivedisorders = Neurocognitivedisorders.x + Neurocognitivedisorders.y) %>%
# mutate(Neurocognitivedisorders = if_else(Neurocognitivedisorders >= 1, 1, 0)) %>%
# select(moh_study_id, Neurocognitivedisorders)
#
# write.csv(Neurocognitivedisorders, "Neurocognitivedisorders.csv", row.names = FALSE)
#
# table(Neurocognitivedisorders$Neurocognitivedisorders)
#
# length(unique(Neurocognitivedisorders$moh_study_id)) == nrow(Neurocognitivedisorders)

# Multiplementalillness1 <- left_join(Icd9_Multiplementalillness_B, Icd10_Multiplementalillness_B, by="moh_study_id") %>%
# mutate_at(c(3), ~replace_na(.,0))
#
# Multiplementalillness <- Multiplementalillness1 %>%
# mutate(Multiplementalillness = Multiplementalillness.x + Multiplementalillness.y) %>%
# mutate(Multiplementalillness = if_else(Multiplementalillness >= 1, 1, 0)) %>%
# select(moh_study_id, Multiplementalillness)
#
# write.csv(Multiplementalillness, "Multiplementalillness.csv", row.names = FALSE)
#
# table(Multiplementalillness$Multiplementalillness)
#
# length(unique(Multiplementalillness$moh_study_id)) == nrow(Multiplementalillness)

# Intellectualdisability1 <- left_join(Icd9_Intellectualdisability_B, Icd10_Intellectualdisability_B, by="moh_study_id") %>%
# mutate_at(c(3), ~replace_na(.,0))
#
# Intellectualdisability <- Intellectualdisability1 %>%
# mutate(Intellectualdisability = Intellectualdisability.x + Intellectualdisability.y) %>%
# mutate(Intellectualdisability = if_else(Intellectualdisability >= 1, 1, 0)) %>%
# select(moh_study_id, Intellectualdisability)
#
# write.csv(Intellectualdisability, "Intellectualdisability.csv", row.names = FALSE)
#
# table(Intellectualdisability$Intellectualdisability)
#
# length(unique(Intellectualdisability$moh_study_id)) == nrow(Intellectualdisability)

# Hallucinogensuse1 <- left_join(Icd9_Hallucinogensuse_B, Icd10_Hallucinogensuse_B, by="moh_study_id") %>%
# mutate_at(c(3), ~replace_na(.,0))
#
# Hallucinogensuse <- Hallucinogensuse1 %>%
# mutate(Hallucinogensuse = Hallucinogensuse.x + Hallucinogensuse.y) %>%
# mutate(Hallucinogensuse = if_else(Hallucinogensuse >= 1, 1, 0)) %>%
# select(moh_study_id, Hallucinogensuse)
#
# write.csv(Hallucinogensuse, "Hallucinogensuse.csv", row.names = FALSE)
#
# table(Hallucinogensuse$Hallucinogensuse)
#
# length(unique(Hallucinogensuse$moh_study_id)) == nrow(Hallucinogensuse)

# Endocarditis1 <- left_join(Icd9_endocarditis_B, Icd10_EndoCarditis_B, by="moh_study_id") %>%
# mutate_at(c(3), ~replace_na(.,0))
#
# Endocarditis <- Endocarditis1 %>%
# mutate(Endocarditis = Endocarditis + EndoCarditis) %>%
# mutate(Endocarditis = if_else(Endocarditis >= 1, 1, 0)) %>%
# select(moh_study_id, Endocarditis)
#
# write.csv(Endocarditis, "Endocarditis.csv", row.names = FALSE)
#
# table(Endocarditis$Endocarditis)
#
# length(unique(Endocarditis$moh_study_id)) == nrow(Endocarditis)

# earlyonsetdisorders1 <- left_join(Icd9_earlyonsetdisorders_B, Icd10_earlyonsetdisorders_B, by="moh_study_id") %>%
# mutate_at(c(3), ~replace_na(.,0))
#
# earlyonsetdisorders <- earlyonsetdisorders1 %>%
# mutate(earlyonsetdisorders = earlyonsetdisorders.x + earlyonsetdisorders.y) %>%
# mutate(earlyonsetdisorders = if_else(earlyonsetdisorders >= 1, 1, 0)) %>%
# select(moh_study_id, earlyonsetdisorders)
#
# write.csv(earlyonsetdisorders, "earlyonsetdisorders.csv", row.names = FALSE)
#
# table(earlyonsetdisorders$earlyonsetdisorders)
#
# length(unique(earlyonsetdisorders$moh_study_id)) == nrow(earlyonsetdisorders)

# Developmentdisorders1 <- left_join(Icd9_Developmentdisorders_B, Icd10_Developmentdisorders_B, by="moh_study_id") %>%
# mutate_at(c(3), ~replace_na(.,0))
#
# Developmentdisorders <- Developmentdisorders1 %>%
# mutate(Developmentdisorders = Developmentdisorders.x + Developmentdisorders.y) %>%
# mutate(Developmentdisorders = if_else(Developmentdisorders >= 1, 1, 0)) %>%
# select(moh_study_id, Developmentdisorders)
#
# write.csv(Developmentdisorders, "Developmentdisorders.csv", row.names = FALSE)
#
# table(Developmentdisorders$Developmentdisorders)
#
#
# length(unique(Developmentdisorders$moh_study_id)) == nrow(Developmentdisorders)

# Cannabinoiduse1 <- left_join(Icd9_Cannabinoiduse_B, Icd10_Cannabinoiduse_B, by="moh_study_id") %>%
# mutate_at(c(3), ~replace_na(.,0))
#
# Cannabinoiduse <- Cannabinoiduse1 %>%
# mutate(Cannabinoiduse = Cannabinoiduse.x + Cannabinoiduse.y) %>%
# mutate(Cannabinoiduse = if_else(Cannabinoiduse >= 1, 1, 0)) %>%
# select(moh_study_id, Cannabinoiduse)
#
# write.csv(Cannabinoiduse, "Cannabinoiduse.csv", row.names = FALSE)
#
# table(Cannabinoiduse$Cannabinoiduse)
#
# length(unique(Cannabinoiduse$moh_study_id)) == nrow(Cannabinoiduse)

# Cocaineuse1 <- left_join(Icd9_Cocaineuse_B, Icd10_Cocaineuse_B, by="moh_study_id") %>%
# mutate_at(c(3), ~replace_na(.,0))
#
# Cocaineuse <- Cocaineuse1 %>%
# mutate(Cocaineuse = Cocaineuse.x + Cocaineuse.y) %>%
# mutate(Cocaineuse = if_else(Cocaineuse >= 1, 1, 0)) %>%
# select(moh_study_id, Cocaineuse)
#
# write.csv(Cocaineuse, "Cocaineuse.csv", row.names = FALSE)
#
# table(Cocaineuse$Cocaineuse)
#
# length(unique(Cocaineuse$moh_study_id)) == nrow(Cocaineuse)

# Behaviouralpsychologicaldisturbances1 <- left_join(Icd9_Behaviouralpsychologicaldistrubances_B, Icd10_Behaviouralpsychologicaldistrubances_B, by="moh_study_id") %>%
# mutate_at(c(3), ~replace_na(.,0))
#
# Behaviouralpsychologicaldisturbances <-Behaviouralpsychologicaldisturbances1 %>%
# mutate(Behaviouralpsychologicaldisturbances = Behaviouralpsychologicaldistrubances.x + Behaviouralpsychologicaldistrubances.y) %>%
# mutate(Behaviouralpsychologicaldisturbances = if_else(Behaviouralpsychologicaldisturbances >= 1, 1, 0)) %>%
# select(moh_study_id, Behaviouralpsychologicaldisturbances)
#
# write.csv(Behaviouralpsychologicaldisturbances, "Behaviouralpsychologicaldisturbances.csv", row.names = FALSE)
#
# table(Behaviouralpsychologicaldisturbances$Behaviouralpsychologicaldisturbances)
#
# length(unique(Behaviouralpsychologicaldisturbances$moh_study_id)) == nrow(Behaviouralpsychologicaldisturbances)

# Alcoholuse1 <- left_join(Icd9_Alcoholuse_B, Icd10_Alcoholuse_B, by="moh_study_id") %>%
# mutate_at(c(3), ~replace_na(.,0))
#
# Alcoholuse <- Alcoholuse1 %>%
# mutate(Alcoholuse = Alcoholuse.x + Alcoholuse.y) %>%
# mutate(Alcoholuse = if_else(Alcoholuse >= 1, 1, 0)) %>%
# select(moh_study_id, Alcoholuse)
#
# write.csv(Alcoholuse, "Alcoholuse.csv", row.names = FALSE)
#
# table(Alcoholuse$Alcoholuse)
#
# length(unique(Alcoholuse$moh_study_id)) == nrow(Alcoholuse)

Data confirmation

You can also embed plots, for example:

# length(unique(substancerelateddisorders$moh_study_id))

#
# Mooddisorders1 <- Mooddisorders[!duplicated(Mooddisorders$moh_study_id), ]

# Mooddisorders1 <- Mooddisorders %>%
# distinct(moh_study_id, .keep_all = TRUE)

# table(substancerelateddisorders$substancerelateddisorders)
# table(substancerelateddisorders1$substancerelateddisorders)
#
# table(substancerelateddisorders3$substancerelateddisorders)
#
# table(substancerelateddisorders101$substancerelateddisorders)

# table(Tobaccouse$Tobaccouse)
# table(Tobaccouse1$Tobaccouse)
# table(Mooddisorders$Mooddisorders)
# table(Mooddisorders1$Mooddisorders)
# table(ICD3$Tobaccouse)

# substancerelateddisorders2 <- unique(substancerelateddisorders [, 1:2])
#
#
# substancerelateddisorders2[duplicated(substancerelateddisorders2[,1:2])]
# table(substancerelateddisorders2$substancerelateddisorders)

# duplicated(substancerelateddisorders$substancerelateddisorders)

# write.csv(Tobaccouse1, "Tobaccouse.csv", row.names = FALSE)

# length(unique(ICD26$moh_study_id)) == nrow(ICD26)

###combining the icd datasets

#
#
# ICD1 <- left_join(substancerelateddisorders, Tobaccouse, by = "moh_study_id")
#
# ICD2 <- ICD1 %>%
# distinct(moh_study_id, .keep_all = TRUE)
#
# ICD3 <- left_join(ICD2, Alcoholuse, by = "moh_study_id")
#
# ICD4 <- left_join(ICD3, Behaviouralpsychologicaldisturbances, by = "moh_study_id")
#
# ICD5 <- left_join(ICD4, Cannabinoiduse, by = "moh_study_id")
#
# ICD6 <- left_join(ICD5, Cocaineuse, by = "moh_study_id")
#
# ICD7 <- left_join(ICD6, Developmentdisorders, by = "moh_study_id")
#
# ICD8 <- left_join(ICD7, earlyonsetdisorders, by = "moh_study_id")
#
# ICD9 <- left_join(ICD8, Endocarditis, by = "moh_study_id")
#
# ICD10 <- left_join(ICD9, Hallucinogensuse, by = "moh_study_id")
#
# ICD11 <- left_join(ICD10, Intellectualdisability, by = "moh_study_id")
#
# ICD12 <- left_join(ICD11, Mooddisorders, by = "moh_study_id")
#
# ICD13 <- left_join(ICD12, Multiplementalillness, by = "moh_study_id")
#
# ICD14 <- left_join(ICD13, Neurocognitivedisorders, by = "moh_study_id")
#
# ICD15 <- left_join(ICD14, Neuroticrelateddisorders, by = "moh_study_id")
#
# ICD16 <- left_join(ICD15, Opioiduse, by = "moh_study_id")
#
# ICD17 <- left_join(ICD16, Osteomyelitis, by = "moh_study_id")
#
# ICD18 <- left_join(ICD17, Otherpsychoactivedruguse, by = "moh_study_id")
#
# ICD19 <- left_join(ICD18, Personalitydisorders, by = "moh_study_id")
#
# ICD20 <- left_join(ICD19, Polysubstance, by = "moh_study_id")
#
# ICD21 <- left_join(ICD20, psychoticdisorders, by = "moh_study_id")
#
# ICD22 <- left_join(ICD21, Sedativeandhypnoticuse, by = "moh_study_id")
#
# ICD23 <- left_join(ICD22, Sepsis, by = "moh_study_id")
#
# ICD24 <- left_join(ICD23, Stimulantuse, by = "moh_study_id")
#
# ICD25 <- left_join(ICD24, Tissueinfection, by = "moh_study_id")

# write.csv(ICD26, "ICD_derivedvariables.csv", row.names = FALSE)

# all.equal(ICD26, ICDderivedvariables)

Combining all files

library(tidyverse)

## -- Attaching core tidyverse packages ------------------------ tidyverse 2.0.0 --
## v dplyr 1.1.2 v readr 2.1.4
## v forcats 1.0.0 v stringr 1.5.0
## v ggplot2 3.4.2 v tibble 3.2.1
## v lubridate 1.9.2 v tidyr 1.3.0
## v purrr 1.0.1
## -- Conflicts ------------------------------------------ tidyverse_conflicts() --
## x dplyr::filter() masks stats::filter()
## x dplyr::lag() masks stats::lag()
## i Use the conflicted package (<http://conflicted.r-lib.org/>) to force all conflicts to become errors

library(dplyr)
library(gapminder)
library(caret)

## Loading required package: lattice
##
## Attaching package: 'caret'
##
## The following object is masked from 'package:purrr':
##
## lift

library(xgboost)

##
## Attaching package: 'xgboost'
##
## The following object is masked from 'package:dplyr':
##
## slice

library(forcats)
library(mice)

##
## Attaching package: 'mice'
##
## The following object is masked from 'package:stats':
##
## filter
##
## The following objects are masked from 'package:base':
##
## cbind, rbind

library(vctrs)

##
## Attaching package: 'vctrs'
##
## The following object is masked from 'package:dplyr':
##
## data_frame
##
## The following object is masked from 'package:tibble':
##
## data_frame

library(naniar)
library(arsenal)

##
## Attaching package: 'arsenal'
##
## The following object is masked from 'package:lubridate':
##
## is.Date

Cleaning CDR case

# length(unique(vw_od_case$moh_study_id)) == nrow(vw_od_case)
#
# length(unique(vw_cdr_case$moh_study_id)) == nrow(vw_cdr_case)

# vw_cdr_case1 <- (vw_cdr_case %>%
# mutate(across(ends_with("_date"), ~case_when(
# .x >= 1 ~ 1,
#
#
# TRUE ~ 0), .names = "{.col}_b")))

# vw_cdr_case_b <- (vw_cdr_case1 %>%
# select(moh_study_id, ends_with("_b")))

# write.csv(vw_cdr_case_b, "vw_cdr_case_b.csv", row.names = FALSE)

#Table of data sets, descriptive

ICDderivedvariables <- read_csv("U:/Andy's Thesis/MLoverdose/MLdataset/ICDderivedvariables.csv" , show_col_types = FALSE)
Pharmanetdinpin <- read_csv("U:/Andy's Thesis/MLoverdose/MLdataset/Pharmanetdinpin.csv" , show_col_types = FALSE)
vw_cdr_case_b <- read_csv("U:/Andy's Thesis/MLoverdose/MLdataset/vw_cdr_case_b.csv" , show_col_types = FALSE)
vw_od_case <- read_csv("U:/Andy's Thesis/MLoverdose/MLdataset/vw_od_case.csv" , show_col_types = FALSE)

glimpse(ICDderivedvariables)

## Rows: 1,094,606
## Columns: 27
glimpse(Pharmanetdinpin)

## Rows: 57,902,314
## Columns: 3
glimpse(vw_cdr_case_b)

## Rows: 609,684
## Columns: 33
glimpse(vw_od_case)

## Rows: 36,679
## Columns: 7

Joinning all the datasets

You can also embed plots, for example:

# unique(length(ICDderivedvariables$moh_study_id))
#
# unique(length(dataset3$moh_study_id))

# dataset1 <- left_join(vw_od_case, vw_cdr_case_b, by = "moh_study_id")
#
#
#
# dataset2 <- left_join( dataset1, Pharmanetdinpin_f, by = "moh_study_id")
#
# dataset3 <- left_join(dataset2, ICDderivedvariables, by = "moh_study_id")
#

# write.csv(dataset3, "datasetfirst.csv", row.names = FALSE)

dataset3 <- read_csv("U:/Andy's Thesis/MLoverdose/datasetfirst.csv" , show_col_types = FALSE)

# table(Pharmanetdinpin_f$oat)
# table(Pharmanetdinpin$oat)

# Pharmanetdinpin_f <- Pharmanetdinpin %>%
# distinct(moh_study_id, .keep_all = TRUE)

# length(unique(Pharmanetdinpin_f$moh_study_id)) == nrow(Pharmanetdinpin_f)
# table(vw_od_case$fatal_od_case)

gg_miss_var(dataset3, show_pct = TRUE)

## Warning: The `guide` argument in `scale_*()` cannot be `FALSE`. This was deprecated in
## ggplot2 3.3.4.
## i Please use "none" instead.
## i The deprecated feature was likely used in the naniar package.
## Please report the issue at <https://github.com/njtierney/naniar/issues>.
## This warning is displayed once every 8 hours.
## Call `lifecycle::last_lifecycle_warnings()` to see where this warning was
## generated.


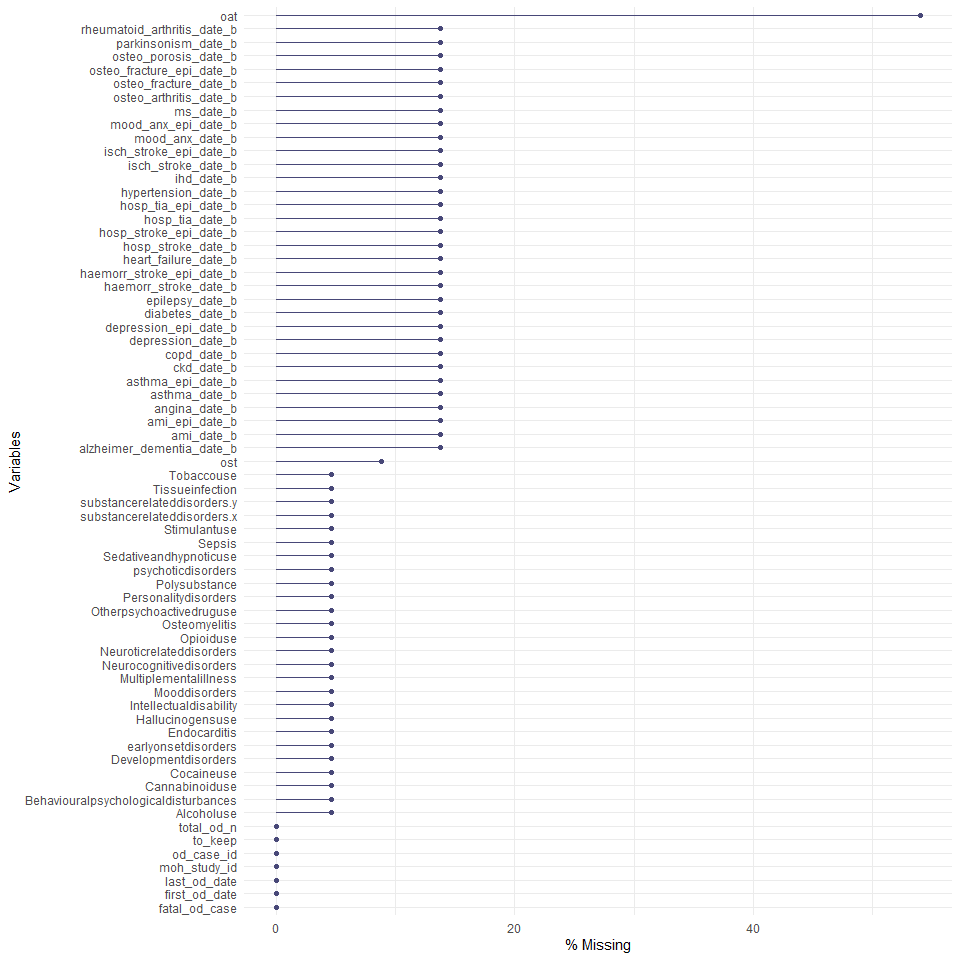


table(dataset3$fatal_od_case)

##
## 0 1
## 31097 6527

glimpse(dataset3)

## Rows: 37,624
## Columns: 67

###Data descriptive

# Pharmanetspss <- read_csv("U:/Andy's Thesis/Raw_data_used/Pharmanetspss.csv" , show_col_types = FALSE)

# glimpse(Pharmanetspss)

###OST/OAT

# dinpin <- (Pharmanetspss %>%
# mutate(across(starts_with("din_pin"), ~case_when(
# .x=="2242963"~ 1,
# .x=="2242964"~ 1,
# .x=="2295695"~ 1,
# .x=="2295709"~ 1,
# .x=="2408104"~ 1,
# .x=="2424851"~ 1,
# .x=="2424878"~ 1,
# .x=="999776"~ 1,
# .x=="665619"~ 1,
# .x=="655627"~ 1,
# .x=="781460"~ 1,
# .x=="781479"~ 1,
# .x=="2408090"~ 1,
# (.x >= 999792) & (.x <= 999793) ~ 1,
# (.x >= 66999990) & (.x <= 66999993) ~ 1,
# (.x >= 66999990) & (.x <= 66999993) ~ 1,
# (.x >= 66999997) & (.x <= 66999999) ~ 1,
# (.x >= 67000000) & (.x <= 67000004) ~ 1,
# (.x >= 22123346) & (.x <= 22123349) ~ 1,
# TRUE ~ 0), .names = "derivde{.col}")))

# dinpin_1 <- dinpin %>%
# rename(ost = derivdedin_pin) %>%
# select(moh_study_id, oat, ost)

# write.csv(dinpin_1, "Pharmanetdinpin.csv", row.names = FALSE)

ML Prediction Code for Fatal Overdose

Data preprocessing

library(rlang)
library(tidyverse)

## -- Attaching core tidyverse packages ------------------------ tidyverse 2.0.0 --
## v dplyr 1.1.2 v readr 2.1.4
## v forcats 1.0.0 v stringr 1.5.0
## v ggplot2 3.4.2 v tibble 3.2.1
## v lubridate 1.9.2 v tidyr 1.3.0
## v purrr 1.0.1
## -- Conflicts ------------------------------------------ tidyverse_conflicts() --
## x purrr::%@%() masks rlang::%@%()
## x dplyr::filter() masks stats::filter()
## x purrr::flatten() masks rlang::flatten()
## x purrr::flatten_chr() masks rlang::flatten_chr()
## x purrr::flatten_dbl() masks rlang::flatten_dbl()
## x purrr::flatten_int() masks rlang::flatten_int()
## x purrr::flatten_lgl() masks rlang::flatten_lgl()
## x purrr::flatten_raw() masks rlang::flatten_raw()
## x purrr::invoke() masks rlang::invoke()
## x dplyr::lag() masks stats::lag()
## x purrr::splice() masks rlang::splice()
## i Use the conflicted package (<http://conflicted.r-lib.org/>) to force all conflicts to become errors

library(dplyr)
library(gapminder)
library(xgboost)

##
## Attaching package: 'xgboost'
##
## The following object is masked from 'package:dplyr':
##
## slice

library(forcats)
library(mice)

##
## Attaching package: 'mice'
##
## The following object is masked from 'package:stats':
##
## filter
##
## The following objects are masked from 'package:base':
##
## cbind, rbind

library(vctrs)

##
## Attaching package: 'vctrs'
##
## The following object is masked from 'package:dplyr':
##
## data_frame
##
## The following object is masked from 'package:tibble':
##
## data_frame

library(naniar)
library(yardstick)

## For binary classification, the first factor level is assumed to be the event.
## Use the argument `event_level = "second"` to alter this as needed.
##
## Attaching package: 'yardstick'
##
## The following object is masked from 'package:readr':
##
## spec

library(forcats)
library(Boruta)
library(ROSE)

## Loaded ROSE 0.0-4

library(imbalance)
library(ROCR)
library(mlbench)
library(ggplot2)
library(data.table)

##
## Attaching package: 'data.table'
##
## The following objects are masked from 'package:lubridate':
##
## hour, isoweek, mday, minute, month, quarter, second, wday, week,
## yday, year
##
## The following objects are masked from 'package:dplyr':
##
## between, first, last
##
## The following object is masked from 'package:purrr':
##
## transpose
##
## The following object is masked from 'package:rlang':
##
## :=

library(here)

## here() starts at R:/atai-22-075/Andy's Thesis/MLoverdose

library(caret)

## Loading required package: lattice
##
## Attaching package: 'caret'
##
## The following objects are masked from 'package:yardstick':
##
## precision, recall, sensitivity, specificity
##
## The following object is masked from 'package:purrr':
##
## lift

dataset3 <- read_csv("U:/Andy's Thesis/MLoverdose/datasetfirst.csv" , show_col_types = FALSE)

# Control <- dataset3 %>%
# filter(fatal_od_case == 0)
#
# Case <- dataset3 %>%
# filter(fatal_od_case == 1)

# colSums(is.na(dataset3))
#
# colSums(is.na(Case))
#
# colSums(is.na(Control))

gg_miss_var(dataset3, show_pct = TRUE)

## Warning: The `guide` argument in `scale_*()` cannot be `FALSE`. This was deprecated in
## ggplot2 3.3.4.
## i Please use "none" instead.
## i The deprecated feature was likely used in the naniar package.
## Please report the issue at <https://github.com/njtierney/naniar/issues>.
## This warning is displayed once every 8 hours.
## Call `lifecycle::last_lifecycle_warnings()` to see where this warning was
## generated.


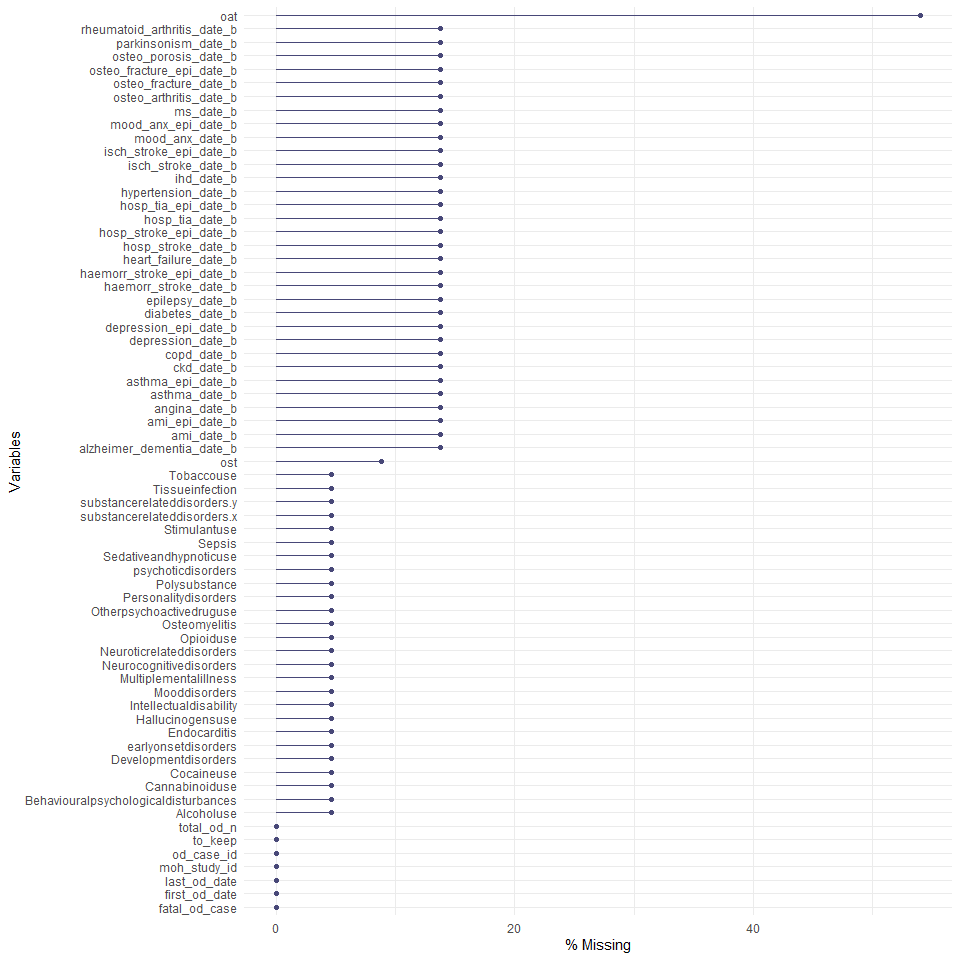
 ## Removing osteo_fracture as there are none in this population “osteo_fracture_date_b”

data1 <- dataset3 %>%
 select(moh_study_id, ost, rheumatoid_arthritis_date_b, parkinsonism_date_b, osteo_arthritis_date_b, osteo_porosis_date_b, ms_date_b, mood_anx_date_b, isch_stroke_date_b, ihd_date_b, hypertension_date_b, hosp_tia_date_b, hosp_stroke_date_b, heart_failure_date_b, haemorr_stroke_date_b, epilepsy_date_b, diabetes_date_b, depression_date_b, copd_date_b, ckd_date_b, asthma_date_b, angina_date_b, ami_date_b, alzheimer_dementia_date_b, Tobaccouse, Tissueinfection, substancerelateddisorders.x, Stimulantuse, Sepsis, Sedativeandhypnoticuse, psychoticdisorders, Polysubstance, Personalitydisorders, Otherpsychoactivedruguse, Osteomyelitis, Opioiduse, Neuroticrelateddisorders, Neurocognitivedisorders, Multiplementalillness, Mooddisorders, Intellectualdisability, Hallucinogensuse, Endocarditis, earlyonsetdisorders, Developmentdisorders, Cocaineuse, Cannabinoiduse, Behaviouralpsychologicaldisturbances, Alcoholuse, fatal_od_case, total_od_n, first_od_date, last_od_date)


 data2 <- data1 %>%
distinct(moh_study_id, .keep_all = TRUE)

 data3 <- data2[,-1]

 moh <- data1 %>% select(moh_study_id)

table(data3$fatal_od_case)

##
## 0 1
## 30253 6426

###splitting

set.seed(2001)

na_count0 <- sapply(data3, function(y) sum(length(which(is.na(y)))))

na_count00 <- data.frame(na_count0)

na_count00

## na_count0
## ost 3306
## rheumatoid_arthritis_date_b 5175
## parkinsonism_date_b 5175
## osteo_arthritis_date_b 5175
## osteo_porosis_date_b 5175
## ms_date_b 5175
## mood_anx_date_b 5175
## isch_stroke_date_b 5175
## ihd_date_b 5175
## hypertension_date_b 5175
## hosp_tia_date_b 5175
## hosp_stroke_date_b 5175
## heart_failure_date_b 5175
## haemorr_stroke_date_b 5175
## epilepsy_date_b 5175
## diabetes_date_b 5175
## depression_date_b 5175
## copd_date_b 5175
## ckd_date_b 5175
## asthma_date_b 5175
## angina_date_b 5175
## ami_date_b 5175
## alzheimer_dementia_date_b 5175
## Tobaccouse 1735
## Tissueinfection 1735
## substancerelateddisorders.x 1735
## Stimulantuse 1735
## Sepsis 1735
## Sedativeandhypnoticuse 1735
## psychoticdisorders 1735
## Polysubstance 1735
## Personalitydisorders 1735
## Otherpsychoactivedruguse 1735
## Osteomyelitis 1735
## Opioiduse 1735
## Neuroticrelateddisorders 1735
## Neurocognitivedisorders 1735
## Multiplementalillness 1735
## Mooddisorders 1735
## Intellectualdisability 1735
## Hallucinogensuse 1735
## Endocarditis 1735
## earlyonsetdisorders 1735
## Developmentdisorders 1735
## Cocaineuse 1735
## Cannabinoiduse 1735
## Behaviouralpsychologicaldisturbances 1735
## Alcoholuse 1735
## fatal_od_case 0
## total_od_n 0
## first_od_date 0
## last_od_date 0

data <- data3


 index= createDataPartition(y=data$fatal_od_case, p = 0.7, list = FALSE)


 train.set = data[index,]
 test.set = data[-index,]

gg_miss_var(train.set)


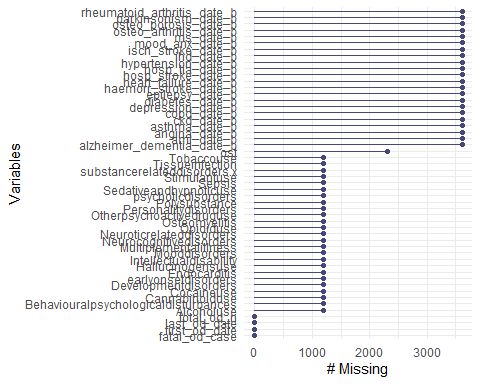


gg_miss_var(test.set)


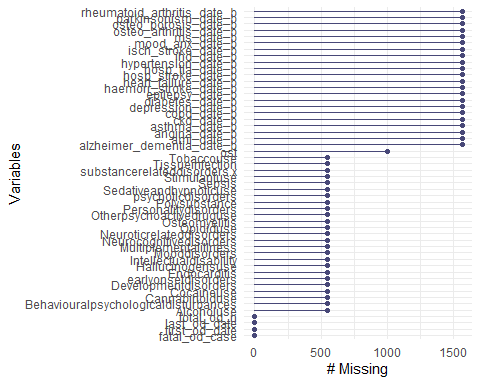


na_count1 <- sapply(train.set, function(y) sum(length(which(is.na(y)))))

na_count <- data.frame(na_count1)

na_count

## na_count1
## ost 2306
## rheumatoid_arthritis_date_b 3611
## parkinsonism_date_b 3611
## osteo_arthritis_date_b 3611
## osteo_porosis_date_b 3611
## ms_date_b 3611
## mood_anx_date_b 3611
## isch_stroke_date_b 3611
## ihd_date_b 3611
## hypertension_date_b 3611
## hosp_tia_date_b 3611
## hosp_stroke_date_b 3611
## heart_failure_date_b 3611
## haemorr_stroke_date_b 3611
## epilepsy_date_b 3611
## diabetes_date_b 3611
## depression_date_b 3611
## copd_date_b 3611
## ckd_date_b 3611
## asthma_date_b 3611
## angina_date_b 3611
## ami_date_b 3611
## alzheimer_dementia_date_b 3611
## Tobaccouse 1190
## Tissueinfection 1190
## substancerelateddisorders.x 1190
## Stimulantuse 1190
## Sepsis 1190
## Sedativeandhypnoticuse 1190
## psychoticdisorders 1190
## Polysubstance 1190
## Personalitydisorders 1190
## Otherpsychoactivedruguse 1190
## Osteomyelitis 1190
## Opioiduse 1190
## Neuroticrelateddisorders 1190
## Neurocognitivedisorders 1190
## Multiplementalillness 1190
## Mooddisorders 1190
## Intellectualdisability 1190
## Hallucinogensuse 1190
## Endocarditis 1190
## earlyonsetdisorders 1190
## Developmentdisorders 1190
## Cocaineuse 1190
## Cannabinoiduse 1190
## Behaviouralpsychologicaldisturbances 1190
## Alcoholuse 1190
## fatal_od_case 0
## total_od_n 0
## first_od_date 0
## last_od_date 0

na_count2 <- sapply(test.set, function(y) sum(length(which(is.na(y)))))

na_count3 <- data.frame(na_count2)

na_count3

## na_count2
## ost 1000
## rheumatoid_arthritis_date_b 1564
## parkinsonism_date_b 1564
## osteo_arthritis_date_b 1564
## osteo_porosis_date_b 1564
## ms_date_b 1564
## mood_anx_date_b 1564
## isch_stroke_date_b 1564
## ihd_date_b 1564
## hypertension_date_b 1564
## hosp_tia_date_b 1564
## hosp_stroke_date_b 1564
## heart_failure_date_b 1564
## haemorr_stroke_date_b 1564
## epilepsy_date_b 1564
## diabetes_date_b 1564
## depression_date_b 1564
## copd_date_b 1564
## ckd_date_b 1564
## asthma_date_b 1564
## angina_date_b 1564
## ami_date_b 1564
## alzheimer_dementia_date_b 1564
## Tobaccouse 545
## Tissueinfection 545
## substancerelateddisorders.x 545
## Stimulantuse 545
## Sepsis 545
## Sedativeandhypnoticuse 545
## psychoticdisorders 545
## Polysubstance 545
## Personalitydisorders 545
## Otherpsychoactivedruguse 545
## Osteomyelitis 545
## Opioiduse 545
## Neuroticrelateddisorders 545
## Neurocognitivedisorders 545
## Multiplementalillness 545
## Mooddisorders 545
## Intellectualdisability 545
## Hallucinogensuse 545
## Endocarditis 545
## earlyonsetdisorders 545
## Developmentdisorders 545
## Cocaineuse 545
## Cannabinoiduse 545
## Behaviouralpsychologicaldisturbances 545
## Alcoholuse 545
## fatal_od_case 0
## total_od_n 0
## first_od_date 0
## last_od_date 0

fatal <- data %>%
 filter(fatal_od_case == 1 )

control <- data %>%
 filter(fatal_od_case == 0 )


na_count1 <- sapply(fatal, function(y) sum(length(which(is.na(y)))))

na_count <- data.frame(na_count1)

na_count

## na_count1
## ost 684
## rheumatoid_arthritis_date_b 939
## parkinsonism_date_b 939
## osteo_arthritis_date_b 939
## osteo_porosis_date_b 939
## ms_date_b 939
## mood_anx_date_b 939
## isch_stroke_date_b 939
## ihd_date_b 939
## hypertension_date_b 939
## hosp_tia_date_b 939
## hosp_stroke_date_b 939
## heart_failure_date_b 939
## haemorr_stroke_date_b 939
## epilepsy_date_b 939
## diabetes_date_b 939
## depression_date_b 939
## copd_date_b 939
## ckd_date_b 939
## asthma_date_b 939
## angina_date_b 939
## ami_date_b 939
## alzheimer_dementia_date_b 939
## Tobaccouse 337
## Tissueinfection 337
## substancerelateddisorders.x 337
## Stimulantuse 337
## Sepsis 337
## Sedativeandhypnoticuse 337
## psychoticdisorders 337
## Polysubstance 337
## Personalitydisorders 337
## Otherpsychoactivedruguse 337
## Osteomyelitis 337
## Opioiduse 337
## Neuroticrelateddisorders 337
## Neurocognitivedisorders 337
## Multiplementalillness 337
## Mooddisorders 337
## Intellectualdisability 337
## Hallucinogensuse 337
## Endocarditis 337
## earlyonsetdisorders 337
## Developmentdisorders 337
## Cocaineuse 337
## Cannabinoiduse 337
## Behaviouralpsychologicaldisturbances 337
## Alcoholuse 337
## fatal_od_case 0
## total_od_n 0
## first_od_date 0
## last_od_date 0

na_count2 <- sapply(control, function(y) sum(length(which(is.na(y)))))

na_count3 <- data.frame(na_count2)

na_count3

## na_count2
## ost 2622
## rheumatoid_arthritis_date_b 4236
## parkinsonism_date_b 4236
## osteo_arthritis_date_b 4236
## osteo_porosis_date_b 4236
## ms_date_b 4236
## mood_anx_date_b 4236
## isch_stroke_date_b 4236
## ihd_date_b 4236
## hypertension_date_b 4236
## hosp_tia_date_b 4236
## hosp_stroke_date_b 4236
## heart_failure_date_b 4236
## haemorr_stroke_date_b 4236
## epilepsy_date_b 4236
## diabetes_date_b 4236
## depression_date_b 4236
## copd_date_b 4236
## ckd_date_b 4236
## asthma_date_b 4236
## angina_date_b 4236
## ami_date_b 4236
## alzheimer_dementia_date_b 4236
## Tobaccouse 1398
## Tissueinfection 1398
## substancerelateddisorders.x 1398
## Stimulantuse 1398
## Sepsis 1398
## Sedativeandhypnoticuse 1398
## psychoticdisorders 1398
## Polysubstance 1398
## Personalitydisorders 1398
## Otherpsychoactivedruguse 1398
## Osteomyelitis 1398
## Opioiduse 1398
## Neuroticrelateddisorders 1398
## Neurocognitivedisorders 1398
## Multiplementalillness 1398
## Mooddisorders 1398
## Intellectualdisability 1398
## Hallucinogensuse 1398
## Endocarditis 1398
## earlyonsetdisorders 1398
## Developmentdisorders 1398
## Cocaineuse 1398
## Cannabinoiduse 1398
## Behaviouralpsychologicaldisturbances 1398
## Alcoholuse 1398
## fatal_od_case 0
## total_od_n 0
## first_od_date 0
## last_od_date 0

#
# test.set$fatal_od_case = as.factor(test.set $fatal_od_case)
# train.set$fatal_od_case = as.factor(train.set$fatal_od_case)
#
# dim(train.set)
# dim(test.set)
#
# table(train.set$fatal_od_case)
# table(test.set$fatal_od_case)

table(data3$fatal_od_case)

##
## 0 1
## 30253 6426

table(test.set$fatal_od_case)

##
## 0 1
## 9041 1962

table(train.set$fatal_od_case)

##
## 0 1
## 21212 4464

# table(test.set1$fatal_od_case)
#
# table(train.set1$fatal_od_case)

 # write.csv(test.set1, "test.set.csv", row.names = FALSE)
 # write.csv(train.set1, "train.set.csv", row.names = FALSE)

# train.set <- as.data.frame((unclass(train.set)))
#
# train.set1 <- data.frame(complete(mice(train.set, m=15, seed= 123, method = "cart", remove.collinear=FALSE)))
#
#
# test.set <- as.data.frame((unclass(test.set)))
#
# test.set1 <- data.frame(complete(mice(test.set, m=15, seed= 123, method = "cart", remove.collinear=FALSE)))
#
#
# write.csv(test.set1, "test.set.csv", row.names = FALSE)
# write.csv(train.set1, "train.set.csv", row.names = FALSE)

train.set1 <- read_csv("U:/Andy's Thesis/MLoverdose/train.set.csv" , show_col_types = FALSE)

test.set1 <- read_csv("U:/Andy's Thesis/MLoverdose/test.set.csv" , show_col_types = FALSE)

gg_miss_var(train.set1)


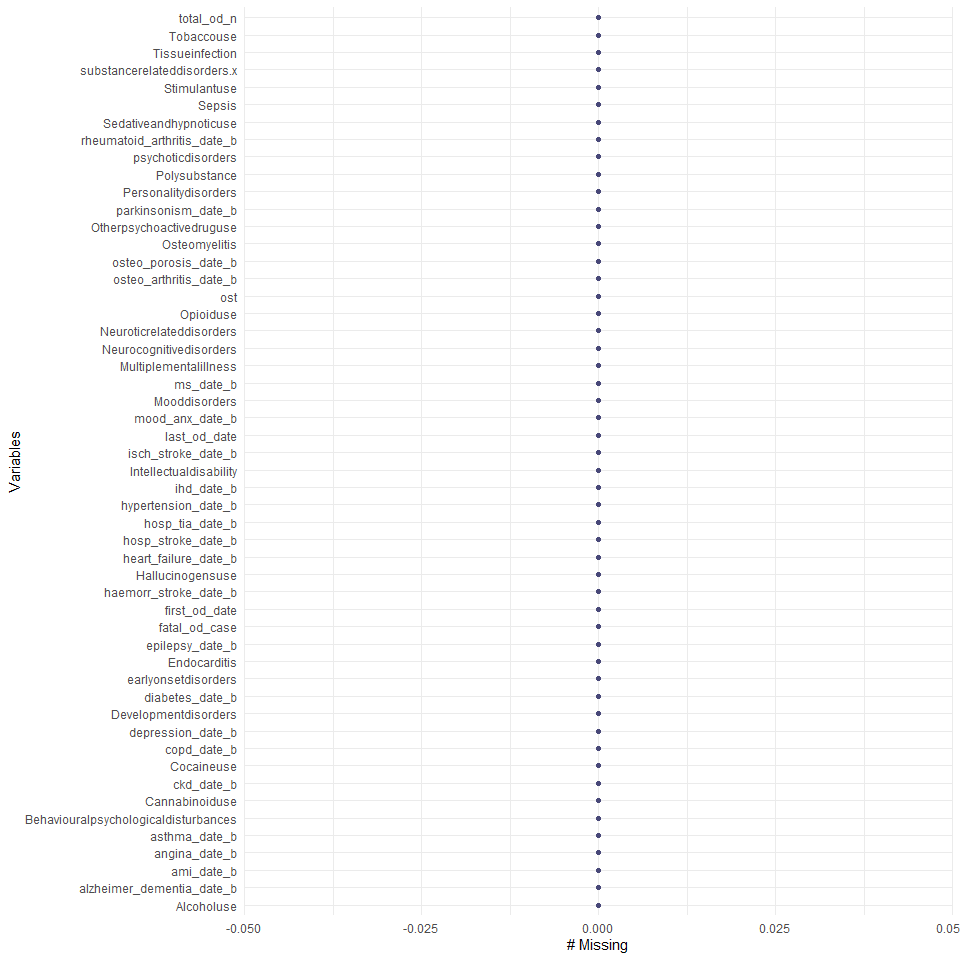


gg_miss_var(test.set1)


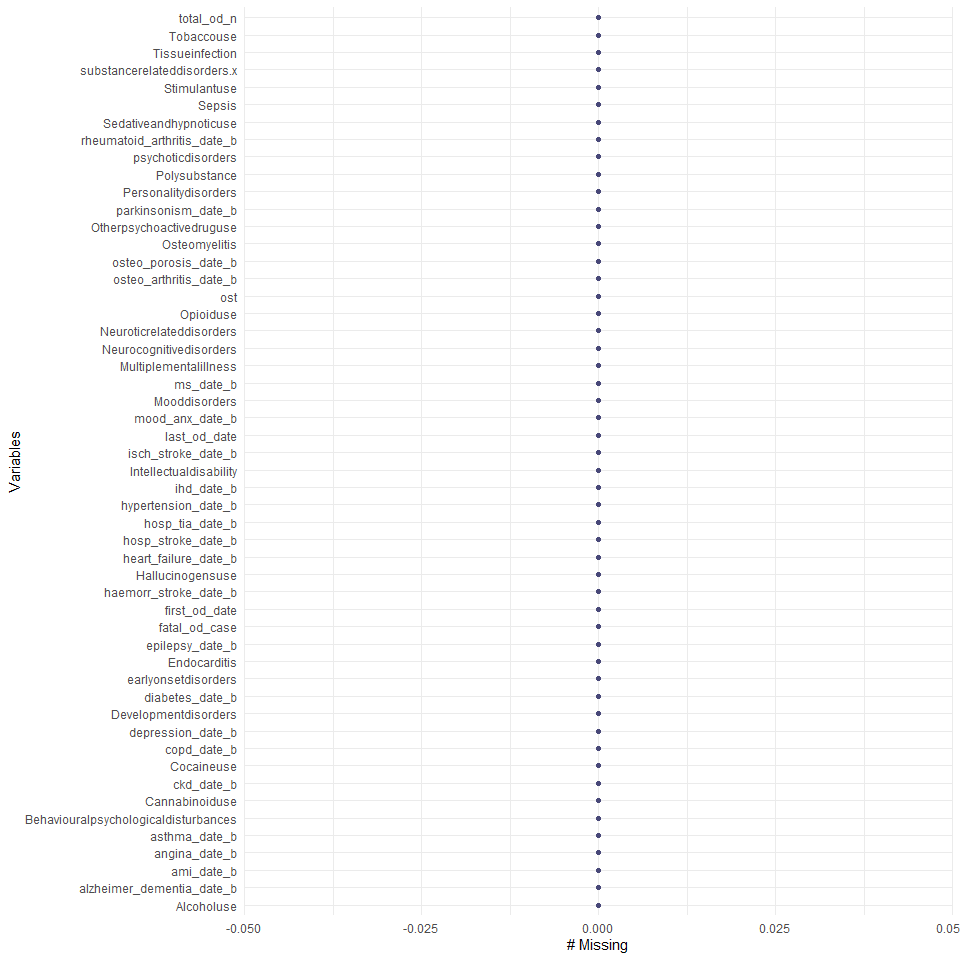


table(train.set1$fatal_od_case)

##
## 0 1
## 21212 4464

table(test.set1$fatal_od_case)

##
## 0 1
## 9041 1962

Class balance

library(keras)
library(tensorflow)
library(rlang)
library(tidyverse)

## -- Attaching core tidyverse packages ------------------------ tidyverse 2.0.0 --
## v dplyr 1.1.2 v readr 2.1.4
## v forcats 1.0.0 v stringr 1.5.0
## v ggplot2 3.4.2 v tibble 3.2.1
## v lubridate 1.9.2 v tidyr 1.3.0
## v purrr 1.0.1
## -- Conflicts ------------------------------------------ tidyverse_conflicts() --
## x purrr::%@%() masks rlang::%@%()
## x dplyr::filter() masks stats::filter()
## x purrr::flatten() masks rlang::flatten()
## x purrr::flatten_chr() masks rlang::flatten_chr()
## x purrr::flatten_dbl() masks rlang::flatten_dbl()
## x purrr::flatten_int() masks rlang::flatten_int()
## x purrr::flatten_lgl() masks rlang::flatten_lgl()
## x purrr::flatten_raw() masks rlang::flatten_raw()
## x purrr::invoke() masks rlang::invoke()
## x dplyr::lag() masks stats::lag()
## x purrr::splice() masks rlang::splice()
## i Use the conflicted package (<http://conflicted.r-lib.org/>) to force all conflicts to become errors

library(dplyr)
library(gapminder)
library(xgboost)

##
## Attaching package: 'xgboost'
##
## The following object is masked from 'package:dplyr':
##
## slice

library(forcats)
library(mice)

##
## Attaching package: 'mice'
##
## The following object is masked from 'package:stats':
##
## filter
##
## The following objects are masked from 'package:base':
##
## cbind, rbind

library(vctrs)

##
## Attaching package: 'vctrs'
##
## The following object is masked from 'package:dplyr':
##
## data_frame
##
## The following object is masked from 'package:tibble':
##
## data_frame

library(naniar)
library(yardstick)

## For binary classification, the first factor level is assumed to be the event.
## Use the argument `event_level = "second"` to alter this as needed.
##
## Attaching package: 'yardstick'
##
## The following object is masked from 'package:readr':
##
## spec
##
## The following object is masked from 'package:keras':
##
## get_weights

library(forcats)
library(Boruta)
library(ROSE)

## Loaded ROSE 0.0-4

library(imbalance)
library(rnn)
library(ROCR)
library(SHAPforxgboost)
library(randomForest)

## randomForest 4.6-14
## Type rfNews() to see new features/changes/bug fixes.
##
## Attaching package: 'randomForest'
##
## The following object is masked from 'package:dplyr':
##
## combine
##
## The following object is masked from 'package:ggplot2':
##
## margin

library(mlbench)
library(ggplot2)
library(data.table)

##
## Attaching package: 'data.table'
##
## The following objects are masked from 'package:lubridate':
##
## hour, isoweek, mday, minute, month, quarter, second, wday, week,
## yday, year
##
## The following objects are masked from 'package:dplyr':
##
## between, first, last
##
## The following object is masked from 'package:purrr':
##
## transpose
##
## The following object is masked from 'package:rlang':
##
## :=

library(here)

## here() starts at R:/atai-22-075/Andy's Thesis/MLoverdose

library(tidymodels)

## -- Attaching packages -------------------------------------- tidymodels 0.1.1 --
## v broom 1.0.4 v recipes 0.1.14
## v dials 0.0.9 v rsample 0.0.8
## v infer 0.5.3 v tune 0.1.1
## v modeldata 0.1.0 v workflows 0.2.1
## v parsnip 0.1.4
## -- Conflicts ----------------------------------------- tidymodels_conflicts() --
## x purrr::%@%() masks rlang::%@%()
## x data.table:::=() masks rlang:::=()
## x data.table::between() masks dplyr::between()
## x randomForest::combine() masks dplyr::combine()
## x vctrs::data_frame() masks dplyr::data_frame(), tibble::data_frame()
## x scales::discard() masks purrr::discard()
## x mice::filter() masks dplyr::filter(), stats::filter()
## x data.table::first() masks dplyr::first()
## x recipes::fixed() masks stringr::fixed()
## x purrr::flatten() masks rlang::flatten()
## x purrr::flatten_chr() masks rlang::flatten_chr()
## x purrr::flatten_dbl() masks rlang::flatten_dbl()
## x purrr::flatten_int() masks rlang::flatten_int()
## x purrr::flatten_lgl() masks rlang::flatten_lgl()
## x purrr::flatten_raw() masks rlang::flatten_raw()
## x yardstick::get_weights() masks keras::get_weights()
## x purrr::invoke() masks rlang::invoke()
## x dplyr::lag() masks stats::lag()
## x data.table::last() masks dplyr::last()
## x randomForest::margin() masks ggplot2::margin()
## x xgboost::slice() masks dplyr::slice()
## x yardstick::spec() masks readr::spec()
## x purrr::splice() masks rlang::splice()
## x recipes::step() masks stats::step()
## x data.table::transpose() masks purrr::transpose()

library(parsnip)
library(caret)

## Loading required package: lattice
##
## Attaching package: 'caret'
##
## The following objects are masked from 'package:yardstick':
##
## precision, recall, sensitivity, specificity
##
## The following object is masked from 'package:purrr':
##
## lift
##
## The following object is masked from 'package:tensorflow':
##
## train

library(kknn)

##
## Attaching package: 'kknn'
##
## The following object is masked from 'package:caret':
##
## contr.dummy

library(yardstick)
library(tune)
library(MatchIt)

train.set <- read_csv("U:/Andy's Thesis/MLoverdose/train.set.csv" , show_col_types = FALSE)

test.set <- read_csv("U:/Andy's Thesis/MLoverdose/test.set.csv" , show_col_types = FALSE)

table(train.set$fatal_od_case)

##
## 0 1
## 21212 4464

###Split Data

###3:1

undersample_rose_train_1 <- read_csv("U:/Andy's Thesis/MLoverdose/undersample_rose_train_1.csv" , show_col_types = FALSE)

table(undersample_rose_train_1$fatal_od_case)

##
## 0 1
## 12039 4464

# undersample_rose_train_2 <- ovun.sample(formula = fatal_od_case ~ ., data = train.set, method = "under", p = 0.27, seed = 2001)
#
#
# undersample_rose_train_1 <- undersample_rose_train_2$data
#
#
# table(undersample_rose_train_1$fatal_od_case)

# write.csv(undersample_rose_train_1, "undersample_rose_train_1.csv", row.names = FALSE)

###1:1

undersample_rose_train_2 <- read_csv("U:/Andy's Thesis/MLoverdose/undersample_rose_train_2.csv" , show_col_types = FALSE)

table(undersample_rose_train_2$fatal_od_case)

##
## 0 1
## 4453 4464

# undersample_rose_train_2 <- ovun.sample(formula = fatal_od_case ~ ., data = train.set, method = "under", p = 0.5, seed = 2001)
#
#
# undersample_rose_train_2 <- undersample_rose_train_2$data
#
#
# table(undersample_rose_train_2$fatal_od_case)

# write.csv(undersample_rose_train_2, "undersample_rose_train_2.csv", row.names = FALSE)

###bothsample

bothsample_rose_train_1 <- read_csv("U:/Andy's Thesis/MLoverdose/bothsample_rose_train_1.csv" , show_col_types = FALSE)

table(bothsample_rose_train_1$fatal_od_case)

##
## 0 1
## 12876 12800

# bothsample_rose_train <- ovun.sample(formula = fatal_od_case ~ ., data = train.set, method = "both", p = 0.5, seed = 2001)
#
#
# bothsample_rose_train_1 <- bothsample_rose_train$data
#
#
#
# table(bothsample_rose_train_1$fatal_od_case)

# write.csv(bothsample_rose_train_1, "bothsample_rose_train_1.csv", row.names = FALSE)

###oversample

oversample_rose_train_1 <- read_csv("U:/Andy's Thesis/MLoverdose/oversample_rose_train_1.csv" , show_col_types = FALSE)

table(oversample_rose_train_1$fatal_od_case)

##
## 0 1
## 21212 21018

# oversample_rose_train <- ovun.sample(formula = fatal_od_case ~ ., data = train.set, method = "over", p = 0.5, seed = 2001)
#
#
# oversample_rose_train_1 <- oversample_rose_train $data
#
#
#
# table(oversample_rose_train_1$fatal_od_case)

# write.csv(oversample_rose_train_1, "oversample_rose_train_1.csv", row.names = FALSE)

ML modeling with Caret

library(keras)
library(tensorflow)
library(rlang)
library(tidyverse)
library(dplyr)
library(gapminder)
library(caret)
library(xgboost)
library(forcats)
library(mice)
library(vctrs)
library(naniar)
library(yardstick)
library(forcats)
library(Boruta)
library(ROSE)
library(imbalance)
library(rnn)
library(ROCR)
library(SHAPforxgboost)
library(randomForest)
library(mlbench)
library(ggplot2)
library(data.table)
library(here)
library(pROC)
library(ROCR)

###Testing the original sample

datasettrain <- read_csv("U:/Andy's Thesis/MLoverdose/train.set.csv" , show_col_types = FALSE)

datasettest <- read_csv("U:/Andy's Thesis/MLoverdose/test.set.csv" , show_col_types = FALSE)

datasettrain <- datasettrain %>%
 mutate(fatal_od_case = recode(fatal_od_case, "0" = "No", "1" = "Yes"))

datasettest <- datasettest %>%
 mutate(fatal_od_case = recode(fatal_od_case, "0" = "No", "1" = "Yes"))

train.set <- datasettrain
test.setog <- datasettest

dim(train.set)

## [1] 25676 50

dim(test.setog)

## [1] 11003 50

nrow(train.set)

## [1] 25676

train.set = train.set %>% mutate_if(is.character, as.factor)
test.setog = test.setog %>% mutate_if(is.character, as.factor)

class(train.set$fatal_od_case)

## [1] "factor"

class(test.setog$fatal_od_case)

## [1] "factor"

table(train.set$fatal_od_case)

##
## No Yes
## 21212 4464

grid_default <- expand.grid(
 nrounds= 300,
 max_depth = 5,
 eta = 0.3, gamma = 0.001,
 colsample_bytree = 0.75,
 min_child_weight = 1,
 subsample = 1
)

train_control <- caret::trainControl(
 method = "none",
 search = "grid",
 summaryFunction = twoClassSummary,
 returnResamp = "none",
 classProbs = TRUE,
 savePredictions = TRUE,
 verboseIter = FALSE,
 allowParallel = TRUE
)

model = caret::train(fatal_od_case ~ .,
 data = train.set,
 trControl = train_control,
 method = "xgbTree",
 tuneGrid = grid_default,
 verbose = TRUE
 )

pred <- predict(model, test.setog)

confusionMatrix(pred, test.setog$fatal_od_case, positive = "Yes")

## Confusion Matrix and Statistics
##
## Reference
## Prediction No Yes
## No 8862 1874
## Yes 179 88
##
## Accuracy : 0.8134
## 95% CI : (0.806, 0.8207)
## No Information Rate : 0.8217
## P-Value [Acc > NIR] : 0.9883
##
## Kappa : 0.0379
##
## Mcnemar's Test P-Value : <2e-16
##
## Sensitivity : 0.044852
## Specificity : 0.980201
## Pos Pred Value : 0.329588
## Neg Pred Value : 0.825447
## Prevalence : 0.178315
## Detection Rate : 0.007998
## Detection Prevalence : 0.024266
## Balanced Accuracy : 0.512527
##
## 'Positive' Class : Yes
##

#saveRDS(model, file=".rds")

class(train.set$fatal_od_case)

## [1] "factor"

#Random Forest

grid_default <- expand.grid(
 .mtry = c(1:7),
 .splitrule="gini",
 .min.node.size=c(1)
)

rf2 = caret::train(fatal_od_case ~ .,
 data = train.set,
 method = "ranger",
 tuneGrid = grid_default,
 verbose = TRUE
 )

P <- predict(rf2, test.setog)
confusionMatrix(P, test.setog$fatal_od_case, positive = "Yes")

## Confusion Matrix and Statistics
##
## Reference
## Prediction No Yes
## No 9040 1952
## Yes 1 10
##
## Accuracy : 0.8225
## 95% CI : (0.8152, 0.8296)
## No Information Rate : 0.8217
## P-Value [Acc > NIR] : 0.4172
##
## Kappa : 0.0082
##
## Mcnemar's Test P-Value : <2e-16
##
## Sensitivity : 0.0050968
## Specificity : 0.9998894
## Pos Pred Value : 0.9090909
## Neg Pred Value : 0.8224163
## Prevalence : 0.1783150
## Detection Rate : 0.0009088
## Detection Prevalence : 0.0009997
## Balanced Accuracy : 0.5024931
##
## 'Positive' Class : Yes
##

###Testing Different Samples

##Undersample 3:1

undersample_rose_train_1 <- read_csv("U:/Andy's Thesis/MLoverdose/undersample_rose_train_1.csv" , show_col_types = FALSE)

undersample_rose_train_1 <- undersample_rose_train_1 %>%
 mutate(fatal_od_case = recode(fatal_od_case, "0" = "No", "1" = "Yes"))

train.set <- undersample_rose_train_1

train.set = train.set %>% mutate_if(is.character, as.factor)

dim(train.set)

## [1] 16503 50

nrow(train.set)

## [1] 16503

table(train.set$fatal_od_case)

##
## No Yes
## 12039 4464

grid_default <- expand.grid(
 nrounds= 300,
 max_depth = 5,
 eta = 0.3, gamma = 0.001,
 colsample_bytree = 0.75,
 min_child_weight = 1,
 subsample = 1
)

train_control <- caret::trainControl(
 method = "none",
 search = "grid",
 summaryFunction = twoClassSummary,
 returnResamp = "none",
 classProbs = TRUE,
 savePredictions = TRUE,
 verboseIter = FALSE,
 allowParallel = TRUE
)

model = caret::train(fatal_od_case ~ .,
 data = train.set,
 trControl = train_control,
 method = "xgbTree",
 tuneGrid = grid_default,
 verbose = TRUE
 )

pred <- predict(model, test.setog)
confusionMatrix(pred, test.setog$fatal_od_case, positive = "Yes")

## Confusion Matrix and Statistics
##
## Reference
## Prediction No Yes
## No 8364 1666
## Yes 677 296
##
## Accuracy : 0.7871
## 95% CI : (0.7793, 0.7947)
## No Information Rate : 0.8217
## P-Value [Acc > NIR] : 1
##
## Kappa : 0.0947
##
## Mcnemar's Test P-Value : <2e-16
##
## Sensitivity : 0.15087
## Specificity : 0.92512
## Pos Pred Value : 0.30421
## Neg Pred Value : 0.83390
## Prevalence : 0.17832
## Detection Rate : 0.02690
## Detection Prevalence : 0.08843
## Balanced Accuracy : 0.53799
##
## 'Positive' Class : Yes
##

#saveRDS(model, file=".rds")

#Random Forest

grid_default <- expand.grid(
 .mtry = c(1:7),
 .splitrule="gini",
 .min.node.size=c(1)
)

rf1 = caret::train(fatal_od_case ~ .,
 data = train.set,
 method = "ranger",
 tuneGrid = grid_default,
 verbose = TRUE
 )

pred <- predict(rf1, test.setog)
confusionMatrix(pred, test.setog$fatal_od_case, positive = "Yes")

## Confusion Matrix and Statistics
##
## Reference
## Prediction No Yes
## No 9019 1932
## Yes 22 30
##
## Accuracy : 0.8224
## 95% CI : (0.8151, 0.8295)
## No Information Rate : 0.8217
## P-Value [Acc > NIR] : 0.4269
##
## Kappa : 0.0208
##
## Mcnemar's Test P-Value : <2e-16
##
## Sensitivity : 0.015291
## Specificity : 0.997567
## Pos Pred Value : 0.576923
## Neg Pred Value : 0.823578
## Prevalence : 0.178315
## Detection Rate : 0.002727
## Detection Prevalence : 0.004726
## Balanced Accuracy : 0.506429
##
## 'Positive' Class : Yes
##

##Undersample 1:1

undersample_rose_train_2 <- read_csv("U:/Andy's Thesis/MLoverdose/undersample_rose_train_2.csv" , show_col_types = FALSE)

undersample_rose_train_2 <- undersample_rose_train_2 %>%
 mutate(fatal_od_case = recode(fatal_od_case, "0" = "No", "1" = "Yes"))

train.set <- undersample_rose_train_2


train.set = train.set %>% mutate_if(is.character, as.factor)

dim(train.set)

## [1] 8917 50

nrow(train.set)

## [1] 8917

table(train.set$fatal_od_case)

##
## No Yes
## 4453 4464

grid_default <- expand.grid(
 nrounds= 300,
 max_depth = 5,
 eta = 0.3, gamma = 0.001,
 colsample_bytree = 0.75,
 min_child_weight = 1,
 subsample = 1
)

train_control <- caret::trainControl(
 method = "none",
 search = "grid",
 summaryFunction = twoClassSummary,
 returnResamp = "none",
 classProbs = TRUE,
 savePredictions = TRUE,
 verboseIter = FALSE,
 allowParallel = TRUE
)

model = caret::train(fatal_od_case ~ .,
 data = train.set,
 trControl = train_control,
 method = "xgbTree",
 tuneGrid = grid_default,
 verbose = TRUE
 )

pred <- predict(model, test.setog)
confusionMatrix(pred, test.setog$fatal_od_case, positive = "Yes")

## Confusion Matrix and Statistics
##
## Reference
## Prediction No Yes
## No 5275 779
## Yes 3766 1183
##
## Accuracy : 0.5869
## 95% CI : (0.5777, 0.5962)
## No Information Rate : 0.8217
## P-Value [Acc > NIR] : 1
##
## Kappa : 0.1168
##
## Mcnemar's Test P-Value : <2e-16
##
## Sensitivity : 0.6030
## Specificity : 0.5835
## Pos Pred Value : 0.2390
## Neg Pred Value : 0.8713
## Prevalence : 0.1783
## Detection Rate : 0.1075
## Detection Prevalence : 0.4498
## Balanced Accuracy : 0.5932
##
## 'Positive' Class : Yes
##

#saveRDS(model, file=".rds")

#Random Forest

grid_default <- expand.grid(
 .mtry = c(1:7),
 .splitrule="gini",
 .min.node.size=c(1)
)

rf1 = caret::train(fatal_od_case ~ .,
 data = train.set,
 method = "ranger",
 tuneGrid = grid_default,
 verbose = TRUE
 )

pred <- predict(rf1, test.setog)
confusionMatrix(pred, test.setog$fatal_od_case, positive = "Yes")

## Confusion Matrix and Statistics
##
## Reference
## Prediction No Yes
## No 5550 786
## Yes 3491 1176
##
## Accuracy : 0.6113
## 95% CI : (0.6021, 0.6204)
## No Information Rate : 0.8217
## P-Value [Acc > NIR] : 1
##
## Kappa : 0.1385
##
## Mcnemar's Test P-Value : <2e-16
##
## Sensitivity : 0.5994
## Specificity : 0.6139
## Pos Pred Value : 0.2520
## Neg Pred Value : 0.8759
## Prevalence : 0.1783
## Detection Rate : 0.1069
## Detection Prevalence : 0.4242
## Balanced Accuracy : 0.6066
##
## 'Positive' Class : Yes
##

##Bothsample 1:1

bothsample_rose_train_1 <- read_csv("U:/Andy's Thesis/MLoverdose/bothsample_rose_train_1.csv" , show_col_types = FALSE)

bothsample_rose_train_1 <- bothsample_rose_train_1 %>%
 mutate(fatal_od_case = recode(fatal_od_case, "0" = "No", "1" = "Yes"))

train.set <- bothsample_rose_train_1

train.set = train.set %>% mutate_if(is.character, as.factor)

dim(train.set)

## [1] 25676 50

nrow(train.set)

## [1] 25676

table(train.set$fatal_od_case)

##
## No Yes
## 12876 12800

grid_default <- expand.grid(
 nrounds= 300,
 max_depth = 5,
 eta = 0.3, gamma = 0.001,
 colsample_bytree = 0.75,
 min_child_weight = 1,
 subsample = 1
)

train_control <- caret::trainControl(
 method = "none",
 search = "grid",
 summaryFunction = twoClassSummary,
 returnResamp = "none",
 classProbs = TRUE,
 savePredictions = TRUE,
 verboseIter = FALSE,
 allowParallel = TRUE
)

model = caret::train(fatal_od_case ~ .,
 data = train.set,
 trControl = train_control,
 method = "xgbTree",
 tuneGrid = grid_default,
 verbose = TRUE
 )

pred <- predict(model, test.setog)
confusionMatrix(pred, test.setog$fatal_od_case, positive = "Yes")

## Confusion Matrix and Statistics
##
## Reference
## Prediction No Yes
## No 5973 907
## Yes 3068 1055
##
## Accuracy : 0.6387
## 95% CI : (0.6297, 0.6477)
## No Information Rate : 0.8217
## P-Value [Acc > NIR] : 1
##
## Kappa : 0.1386
##
## Mcnemar's Test P-Value : <2e-16
##
## Sensitivity : 0.53772
## Specificity : 0.66066
## Pos Pred Value : 0.25588
## Neg Pred Value : 0.86817
## Prevalence : 0.17832
## Detection Rate : 0.09588
## Detection Prevalence : 0.37472
## Balanced Accuracy : 0.59919
##
## 'Positive' Class : Yes
##

#saveRDS(model, file=".rds")

#Random Forest

grid_default <- expand.grid(
 .mtry = c(1:7),
 .splitrule="gini",
 .min.node.size=c(1)
)

rf1 = caret::train(fatal_od_case ~ .,
 data = train.set,
 method = "ranger",
 tuneGrid = grid_default,
 verbose = TRUE
 )

pred <- predict(rf1, test.setog)
confusionMatrix(pred, test.setog$fatal_od_case, positive = "Yes")

## Confusion Matrix and Statistics
##
## Reference
## Prediction No Yes
## No 6366 1020
## Yes 2675 942
##
## Accuracy : 0.6642
## 95% CI : (0.6553, 0.673)
## No Information Rate : 0.8217
## P-Value [Acc > NIR] : 1
##
## Kappa : 0.1385
##
## Mcnemar's Test P-Value : <2e-16
##
## Sensitivity : 0.48012
## Specificity : 0.70413
## Pos Pred Value : 0.26044
## Neg Pred Value : 0.86190
## Prevalence : 0.17832
## Detection Rate : 0.08561
## Detection Prevalence : 0.32873
## Balanced Accuracy : 0.59212
##
## 'Positive' Class : Yes
##

##Oversample 1:1

oversample_rose_train_1 <- read_csv("U:/Andy's Thesis/MLoverdose/oversample_rose_train_1.csv" , show_col_types = FALSE)

oversample_rose_train_1 <- oversample_rose_train_1 %>%
 mutate(fatal_od_case = recode(fatal_od_case, "0" = "No", "1" = "Yes"))

train.set <- oversample_rose_train_1

train.set = train.set %>% mutate_if(is.character, as.factor)

dim(train.set)

## [1] 42230 50

nrow(train.set)

## [1] 42230

table(train.set$fatal_od_case)

##
## No Yes
## 21212 21018

grid_default <- expand.grid(
 nrounds= 300,
 max_depth = 5,
 eta = 0.3, gamma = 0.001,
 colsample_bytree = 0.75,
 min_child_weight = 1,
 subsample = 1
)

train_control <- caret::trainControl(
 method = "none",
 search = "grid",
 summaryFunction = twoClassSummary,
 returnResamp = "none",
 classProbs = TRUE,
 savePredictions = TRUE,
 verboseIter = FALSE,
 allowParallel = TRUE
)

model = caret::train(fatal_od_case ~ .,
 data = train.set,
 trControl = train_control,
 method = "xgbTree",
 tuneGrid = grid_default,
 verbose = TRUE
 )

pred <- predict(model, test.setog)
confusionMatrix(pred, test.setog$fatal_od_case, positive = "Yes")

## Confusion Matrix and Statistics
##
## Reference
## Prediction No Yes
## No 6253 990
## Yes 2788 972
##
## Accuracy : 0.6566
## 95% CI : (0.6477, 0.6655)
## No Information Rate : 0.8217
## P-Value [Acc > NIR] : 1
##
## Kappa : 0.1377
##
## Mcnemar's Test P-Value : <2e-16
##
## Sensitivity : 0.49541
## Specificity : 0.69163
## Pos Pred Value : 0.25851
## Neg Pred Value : 0.86332
## Prevalence : 0.17832
## Detection Rate : 0.08834
## Detection Prevalence : 0.34172
## Balanced Accuracy : 0.59352
##
## 'Positive' Class : Yes
##

#saveRDS(model, file=".rds")

#Random Forest

grid_default <- expand.grid(
 .mtry = c(1:7),
 .splitrule="gini",
 .min.node.size=c(1)
)

rf1 = caret::train(fatal_od_case ~ .,
 data = train.set,
 method = "ranger",
 tuneGrid = grid_default,
 verbose = TRUE
 )

pred <- predict(rf1, test.setog)
confusionMatrix(pred, test.setog$fatal_od_case, positive = "Yes")

## Confusion Matrix and Statistics
##
## Reference
## Prediction No Yes
## No 6682 1109
## Yes 2359 853
##
## Accuracy : 0.6848
## 95% CI : (0.676, 0.6935)
## No Information Rate : 0.8217
## P-Value [Acc > NIR] : 1
##
## Kappa : 0.1391
##
## Mcnemar's Test P-Value : <2e-16
##
## Sensitivity : 0.43476
## Specificity : 0.73908
## Pos Pred Value : 0.26557
## Neg Pred Value : 0.85766
## Prevalence : 0.17832
## Detection Rate : 0.07752
## Detection Prevalence : 0.29192
## Balanced Accuracy : 0.58692
##
## 'Positive' Class : Yes
##

###feature selected (From Boruta)

bothsample_rose_train_1 <- read_csv("U:/Andy's Thesis/MLoverdose/bothsample_rose_train_1.csv" , show_col_types = FALSE)

bothsample_rose_train_1 <- bothsample_rose_train_1 %>%
 mutate(fatal_od_case = recode(fatal_od_case, "0" = "No", "1" = "Yes"))

train.set <- bothsample_rose_train_1

train.set = train.set %>% mutate_if(is.character, as.factor)

dim(train.set)

## [1] 25676 50

nrow(train.set)

## [1] 25676

table(train.set$fatal_od_case)

##
## No Yes
## 12876 12800

train.set <- train.set %>%
 select(fatal_od_case, total_od_n, alzheimer_dementia_date_b, ami_date_b, angina_date_b, ckd_date_b, copd_date_b, depression_date_b, diabetes_date_b, heart_failure_date_b, hypertension_date_b, hosp_stroke_date_b, haemorr_stroke_date_b, isch_stroke_date_b, ihd_date_b, mood_anx_date_b, osteo_arthritis_date_b, osteo_porosis_date_b, ost, substancerelateddisorders.x, Tobaccouse, Cocaineuse, earlyonsetdisorders, Mooddisorders, Multiplementalillness, Neurocognitivedisorders, Neuroticrelateddisorders, Opioiduse, Osteomyelitis, Otherpsychoactivedruguse, Personalitydisorders, Polysubstance, psychoticdisorders, Sepsis, Stimulantuse, Tissueinfection)


test.set <- test.setog %>%
 select(fatal_od_case, total_od_n, alzheimer_dementia_date_b, ami_date_b, angina_date_b, ckd_date_b, copd_date_b, depression_date_b, diabetes_date_b, heart_failure_date_b, hypertension_date_b, hosp_stroke_date_b, haemorr_stroke_date_b, isch_stroke_date_b, ihd_date_b, mood_anx_date_b, osteo_arthritis_date_b, osteo_porosis_date_b, ost, substancerelateddisorders.x, Tobaccouse, Cocaineuse, earlyonsetdisorders, Mooddisorders, Multiplementalillness, Neurocognitivedisorders, Neuroticrelateddisorders, Opioiduse, Osteomyelitis, Otherpsychoactivedruguse, Personalitydisorders, Polysubstance, psychoticdisorders, Sepsis, Stimulantuse, Tissueinfection)

grid_default <- expand.grid(
 nrounds= 300,
 max_depth = 5,
 eta = 0.3, gamma = 0.001,
 colsample_bytree = 0.75,
 min_child_weight = 1,
 subsample = 1
)

train_control <- caret::trainControl(
 method = "none",
 search = "grid",
 summaryFunction = twoClassSummary,
 returnResamp = "none",
 classProbs = TRUE,
 savePredictions = TRUE,
 verboseIter = FALSE,
 allowParallel = TRUE
)

model = caret::train(fatal_od_case ~ .,
 data = train.set,
 trControl = train_control,
 method = "xgbTree",
 tuneGrid = grid_default,
 verbose = TRUE
 )

pred <- predict(model, test.set)
confusionMatrix(pred, test.set$fatal_od_case, positive = "Yes")

## Confusion Matrix and Statistics
##
## Reference
## Prediction No Yes
## No 5980 936
## Yes 3061 1026
##
## Accuracy : 0.6367
## 95% CI : (0.6277, 0.6457)
## No Information Rate : 0.8217
## P-Value [Acc > NIR] : 1
##
## Kappa : 0.1295
##
## Mcnemar's Test P-Value : <2e-16
##
## Sensitivity : 0.52294
## Specificity : 0.66143
## Pos Pred Value : 0.25104
## Neg Pred Value : 0.86466
## Prevalence : 0.17832
## Detection Rate : 0.09325
## Detection Prevalence : 0.37144
## Balanced Accuracy : 0.59218
##
## 'Positive' Class : Yes
##

Validating all the models

bothsample_rose_train_1 <- read_csv("U:/Andy's Thesis/MLoverdose/bothsample_rose_train_1.csv" , show_col_types = FALSE)

datasettest <- read_csv("U:/Andy's Thesis/MLoverdose/test.set.csv" , show_col_types = FALSE)

bothsample_rose_train_1 <- bothsample_rose_train_1 %>%
 mutate(fatal_od_case = recode(fatal_od_case, "0" = "No", "1" = "Yes"))

datasettest <- datasettest %>%
 mutate(fatal_od_case = recode(fatal_od_case, "0" = "No", "1" = "Yes"))

train.set <- bothsample_rose_train_1
test.setog <- datasettest

dim(train.set)

## [1] 25676 50

dim(test.setog)

## [1] 11003 50

nrow(train.set)

## [1] 25676

train.set = train.set %>% mutate_if(is.character, as.factor)
test.setog = test.setog %>% mutate_if(is.character, as.factor)

class(train.set$fatal_od_case)

## [1] "factor"

class(test.setog$fatal_od_case)

## [1] "factor"

table(train.set$fatal_od_case)

##
## No Yes
## 12876 12800

#Xgboost

grid_default <- expand.grid(
 nrounds= 300,
 max_depth = 5,
 eta = 0.3, gamma = 0.001,
 colsample_bytree = 0.75,
 min_child_weight = 1,
 subsample = 1
)

train_control <- caret::trainControl(
 method = "cv",
 number = 10,
 search = "grid",
 summaryFunction = twoClassSummary,
 returnResamp = "none",
 classProbs = TRUE,
 savePredictions = TRUE,
 verboseIter = FALSE,
 allowParallel = TRUE
)

class(train.set$fatal_od_case)

## [1] "factor"

XGBoostmodel = caret::train(fatal_od_case ~ .,
 data = train.set,
 trControl = train_control,
 method = "xgbTree",
 tuneGrid = grid_default,
 verbose = TRUE
 )

confusionMatrix(XGBoostmodel)

## Cross-Validated (10 fold) Confusion Matrix
##
## (entries are percentual average cell counts across resamples)
##
## Reference
## Prediction No Yes
## No 34.0 12.1
## Yes 16.1 37.8
##
## Accuracy (average) : 0.718

confusionMatrix(XGBoostmodel$pred$pred, XGBoostmodel$pred$obs)

## Confusion Matrix and Statistics
##
## Reference
## Prediction No Yes
## No 8734 3098
## Yes 4142 9702
##
## Accuracy : 0.718
## 95% CI : (0.7125, 0.7235)
## No Information Rate : 0.5015
## P-Value [Acc > NIR] : < 2.2e-16
##
## Kappa : 0.4362
##
## Mcnemar's Test P-Value : < 2.2e-16
##
## Sensitivity : 0.6783
## Specificity : 0.7580
## Pos Pred Value : 0.7382
## Neg Pred Value : 0.7008
## Prevalence : 0.5015
## Detection Rate : 0.3402
## Detection Prevalence : 0.4608
## Balanced Accuracy : 0.7181
##
## 'Positive' Class : No
##

#Random Forest

grid_default <- expand.grid(
 .mtry = c(1:7),
 .splitrule="gini",
 .min.node.size=c(1)
)

train_control <- caret::trainControl(
 method = "cv",
 number = 10,
 search = "grid",
 summaryFunction = twoClassSummary,
 returnResamp = "none",
 classProbs = TRUE,
 savePredictions = TRUE,
 verboseIter = FALSE,
 allowParallel = TRUE
)

rf1 = caret::train(fatal_od_case ~ .,
 data = train.set,
 trControl = train_control,
 method = "ranger",
 tuneGrid = grid_default,
 verbose = TRUE
 )

print(rf1)

## Random Forest
##
## 25676 samples
## 49 predictor
## 2 classes: 'No', 'Yes'
##
## No pre-processing
## Resampling: Cross-Validated (10 fold)
## Summary of sample sizes: 23109, 23108, 23108, 23108, 23109, 23109, ...
## Resampling results across tuning parameters:
##
## mtry ROC Sens Spec
## 1 0.6776111 0.6213094 0.6362500
## 2 0.7614541 0.6752852 0.7035156
## 3 0.8207642 0.7141957 0.7685156
## 4 0.8576163 0.7335343 0.8053125
## 5 0.8791872 0.7464265 0.8309375
## 6 0.8929712 0.7560570 0.8478125
## 7 0.9022902 0.7667755 0.8603125
##
## Tuning parameter 'splitrule' was held constant at a value of gini
##
## Tuning parameter 'min.node.size' was held constant at a value of 1
## ROC was used to select the optimal model using the largest value.
## The final values used for the model were mtry = 7, splitrule = gini
## and min.node.size = 1.

confusionMatrix(rf1)

## Cross-Validated (10 fold) Confusion Matrix
##
## (entries are percentual average cell counts across resamples)
##
## Reference
## Prediction No Yes
## No 38.5 7.0
## Yes 11.7 42.9
##
## Accuracy (average) : 0.8134

confusionMatrix(rf1$pred$pred, rf1$pred$obs)

## Confusion Matrix and Statistics
##
## Reference
## Prediction No Yes
## No 64555 19806
## Yes 25577 69794
##
## Accuracy : 0.7475
## 95% CI : (0.7455, 0.7495)
## No Information Rate : 0.5015
## P-Value [Acc > NIR] : < 2.2e-16
##
## Kappa : 0.4951
##
## Mcnemar's Test P-Value : < 2.2e-16
##
## Sensitivity : 0.7162
## Specificity : 0.7790
## Pos Pred Value : 0.7652
## Neg Pred Value : 0.7318
## Prevalence : 0.5015
## Detection Rate : 0.3592
## Detection Prevalence : 0.4694
## Balanced Accuracy : 0.7476
##
## 'Positive' Class : No
##

#Adabag

grid_default <- expand.grid(
 mfinal = 300,
 maxdepth = 5
)


train_control <- caret::trainControl(
 method = "cv",
 number = 10,
 search = "grid",
 summaryFunction = twoClassSummary,
 returnResamp = "none",
 classProbs = TRUE,
 savePredictions = TRUE,
 verboseIter = FALSE,
 allowParallel = TRUE
)

ada = caret::train(fatal_od_case ~ .,
 data = train.set,
 trControl = train_control,
 method = "AdaBag",
 tuneGrid = grid_default,
 verbose = TRUE
 )

print(ada)

## Bagged AdaBoost
##
## 25676 samples
## 49 predictor
## 2 classes: 'No', 'Yes'
##
## No pre-processing
## Resampling: Cross-Validated (10 fold)
## Summary of sample sizes: 23108, 23109, 23109, 23109, 23108, 23108, ...
## Resampling results:
##
## ROC Sens Spec
## 0.6446752 0.6470155 0.5594531
##
## Tuning parameter 'mfinal' was held constant at a value of 300
## Tuning
## parameter 'maxdepth' was held constant at a value of 5

confusionMatrix(ada)

## Cross-Validated (10 fold) Confusion Matrix
##
## (entries are percentual average cell counts across resamples)
##
## Reference
## Prediction No Yes
## No 32.4 22.0
## Yes 17.7 27.9
##
## Accuracy (average) : 0.6034

confusionMatrix(ada$pred$pred, ada$pred$obs)

## Confusion Matrix and Statistics
##
## Reference
## Prediction No Yes
## No 8331 5639
## Yes 4545 7161
##
## Accuracy : 0.6034
## 95% CI : (0.5974, 0.6094)
## No Information Rate : 0.5015
## P-Value [Acc > NIR] : < 2.2e-16
##
## Kappa : 0.2065
##
## Mcnemar's Test P-Value : < 2.2e-16
##
## Sensitivity : 0.6470
## Specificity : 0.5595
## Pos Pred Value : 0.5963
## Neg Pred Value : 0.6117
## Prevalence : 0.5015
## Detection Rate : 0.3245
## Detection Prevalence : 0.5441
## Balanced Accuracy : 0.6032
##
## 'Positive' Class : No
##

#SVM

train_control <- caret::trainControl(
 method = "cv",
 number = 10,
 search = "grid",
 summaryFunction = twoClassSummary,
 returnResamp = "none",
 classProbs = TRUE,
 savePredictions = TRUE,
 verboseIter = FALSE,
 allowParallel = TRUE
)

svmmodel = caret::train(fatal_od_case ~ .,
 data = train.set,
 trControl = train_control,
 method = "svmLinear",
 verbose = TRUE,
 tuneLength = 10
 )

## line search fails -0.6560837 0.05802975 3.141064e-05 -1.433112e-05 -1.054484e-08 3.596e-09 -3.827549e-13line search fails -0.6452092 0.07072446 1.959825e-05 -1.057306e-05 -6.544206e-09 2.683846e-09 -1.566314e-13line search fails -0.6522378 0.07029343 2.337086e-05 -1.215148e-05 -7.832797e-09 3.111043e-09 -2.20863e-13line search fails -0.6557714 0.06298808 2.313091e-05 -1.143945e-05 -7.83848e-09 2.877723e-09 -2.142308e-13line search fails -0.6476412 0.06477405 2.369902e-05 -1.19184e-05 -7.172346e-09 2.707905e-09 -2.022514e-13

print(svmmodel)

## Support Vector Machines with Linear Kernel
##
## 25676 samples
## 49 predictor
## 2 classes: 'No', 'Yes'
##
## No pre-processing
## Resampling: Cross-Validated (10 fold)
## Summary of sample sizes: 23109, 23109, 23108, 23108, 23108, 23109, ...
## Resampling results:
##
## ROC Sens Spec
## 0.6430621 0.5585873 0.6286458
##
## Tuning parameter 'C' was held constant at a value of 1

print(svmmodel)

## Support Vector Machines with Linear Kernel
##
## 25676 samples
## 49 predictor
## 2 classes: 'No', 'Yes'
##
## No pre-processing
## Resampling: Cross-Validated (10 fold)
## Summary of sample sizes: 23109, 23109, 23108, 23108, 23108, 23109, ...
## Resampling results:
##
## ROC Sens Spec
## 0.6430621 0.5585873 0.6286458
##
## Tuning parameter 'C' was held constant at a value of 1

confusionMatrix(svmmodel)

## Cross-Validated (10 fold) Confusion Matrix
##
## (entries are percentual average cell counts across resamples)
##
## Reference
## Prediction No Yes
## No 28.0 18.5
## Yes 22.1 31.3
##
## Accuracy (average) : 0.5935

confusionMatrix(svmmodel$pred$pred, svmmodel$pred$obs)

## Confusion Matrix and Statistics
##
## Reference
## Prediction No Yes
## No 4315 2852
## Yes 3410 4828
##
## Accuracy : 0.5935
## 95% CI : (0.5857, 0.6013)
## No Information Rate : 0.5015
## P-Value [Acc > NIR] : < 2.2e-16
##
## Kappa : 0.1872
##
## Mcnemar's Test P-Value : 1.939e-12
##
## Sensitivity : 0.5586
## Specificity : 0.6286
## Pos Pred Value : 0.6021
## Neg Pred Value : 0.5861
## Prevalence : 0.5015
## Detection Rate : 0.2801
## Detection Prevalence : 0.4652
## Balanced Accuracy : 0.5936
##
## 'Positive' Class : No
##

#Logistic Regression

grid_default <- expand.grid(parameter=c(0.001, 0.01, 0.1, 1, 10, 100, 1000))


train_control <- caret::trainControl(
 method = "cv",
 number = 10,
 search = "grid",
 summaryFunction = twoClassSummary,
 returnResamp = "none",
 classProbs = TRUE,
 savePredictions = TRUE,
 verboseIter = FALSE,
 allowParallel = TRUE
)

LogitModel <- train(fatal_od_case ~ .,
 data = train.set,
 method = "glm",
 family = "binomial",
 trControl = train_control,
 tuneGrid = grid_default
 )


print(LogitModel)

## Generalized Linear Model
##
## 25676 samples
## 49 predictor
## 2 classes: 'No', 'Yes'
##
## No pre-processing
## Resampling: Cross-Validated (10 fold)
## Summary of sample sizes: 23108, 23108, 23108, 23109, 23109, 23108, ...
## Resampling results across tuning parameters:
##
## ROC Sens Spec parameter
## 0.6461732 0.57533 0.636875 0.001
## 0.6461732 0.57533 0.636875 0.001
## 0.6461732 0.57533 0.636875 0.001
## 0.6461732 0.57533 0.636875 0.001
## 0.6461732 0.57533 0.636875 0.001
## 0.6461732 0.57533 0.636875 0.001
## 0.6461732 0.57533 0.636875 0.001
##
## ROC was used to select the optimal model using the largest value.
## The final value used for the model was parameter = 0.001.

confusionMatrix(LogitModel)

## Cross-Validated (10 fold) Confusion Matrix
##
## (entries are percentual average cell counts across resamples)
##
## Reference
## Prediction No Yes
## No 28.9 18.1
## Yes 21.3 31.7
##
## Accuracy (average) : 0.606

confusionMatrix(LogitModel$pred$pred, LogitModel$pred$obs)

## Confusion Matrix and Statistics
##
## Reference
## Prediction No Yes
## No 51856 32536
## Yes 38276 57064
##
## Accuracy : 0.606
## 95% CI : (0.6037, 0.6083)
## No Information Rate : 0.5015
## P-Value [Acc > NIR] : < 2.2e-16
##
## Kappa : 0.2122
##
## Mcnemar's Test P-Value : < 2.2e-16
##
## Sensitivity : 0.5753
## Specificity : 0.6369
## Pos Pred Value : 0.6145
## Neg Pred Value : 0.5985
## Prevalence : 0.5015
## Detection Rate : 0.2885
## Detection Prevalence : 0.4695
## Balanced Accuracy : 0.6061
##
## 'Positive' Class : No
##

#GBM

train_control <- caret::trainControl(
 method = "cv",
 number = 10,
 search = "grid",
 summaryFunction = twoClassSummary,
 returnResamp = "none",
 classProbs = TRUE,
 savePredictions = TRUE,
 verboseIter = FALSE,
 allowParallel = TRUE
)

gbm <- train(fatal_od_case ~ .,
 data = train.set,
 method = "gbm",
 trControl = train_control,
 # tuneGrid = grid_default
 )

## Iter TrainDeviance ValidDeviance StepSize Improve
## 1 1.3814 nan 0.1000 0.0021
## 2 1.3768 nan 0.1000 0.0023
## 3 1.3732 nan 0.1000 0.0019
## 4 1.3701 nan 0.1000 0.0014
## 5 1.3675 nan 0.1000 0.0011
## 6 1.3646 nan 0.1000 0.0013
## 7 1.3627 nan 0.1000 0.0010
## 8 1.3606 nan 0.1000 0.0010
## 9 1.3587 nan 0.1000 0.0009
## 10 1.3570 nan 0.1000 0.0008
## 20 1.3452 nan 0.1000 0.0004
## 40 1.3350 nan 0.1000 0.0001
## 60 1.3301 nan 0.1000 -0.0001
## 80 1.3267 nan 0.1000 0.0000
## 100 1.3239 nan 0.1000 0.0000
## 120 1.3221 nan 0.1000 0.0000
## 140 1.3204 nan 0.1000 -0.0000
## 150 1.3197 nan 0.1000 -0.0000
##

print(gbm)

## Stochastic Gradient Boosting
##
## 25676 samples
## 49 predictor
## 2 classes: 'No', 'Yes'
##
## No pre-processing
## Resampling: Cross-Validated (10 fold)
## Summary of sample sizes: 23109, 23108, 23108, 23108, 23109, 23109, ...
## Resampling results across tuning parameters:
##
## interaction.depth n.trees ROC Sens Spec
## 1 50 0.6344299 0.5729264 0.6201562
## 1 100 0.6418795 0.5639190 0.6355469
## 1 150 0.6444275 0.5697437 0.6338281
## 2 50 0.6468666 0.5800734 0.6325000
## 2 100 0.6575708 0.5892373 0.6369531
## 2 150 0.6626439 0.5937418 0.6414062
## 3 50 0.6548704 0.5992561 0.6246875
## 3 100 0.6655796 0.6008866 0.6375781
## 3 150 0.6726637 0.6049242 0.6457812
##
## Tuning parameter 'shrinkage' was held constant at a value of 0.1
##
## Tuning parameter 'n.minobsinnode' was held constant at a value of 10
## ROC was used to select the optimal model using the largest value.
## The final values used for the model were n.trees = 150, interaction.depth =
## 3, shrinkage = 0.1 and n.minobsinnode = 10.

confusionMatrix(gbm)

## Cross-Validated (10 fold) Confusion Matrix
##
## (entries are percentual average cell counts across resamples)
##
## Reference
## Prediction No Yes
## No 30.3 17.7
## Yes 19.8 32.2
##
## Accuracy (average) : 0.6253

confusionMatrix(gbm$pred$pred, gbm$pred$obs)

## Confusion Matrix and Statistics
##
## Reference
## Prediction No Yes
## No 67917 42132
## Yes 47967 73068
##
## Accuracy : 0.6101
## 95% CI : (0.6081, 0.6121)
## No Information Rate : 0.5015
## P-Value [Acc > NIR] : < 2.2e-16
##
## Kappa : 0.2203
##
## Mcnemar's Test P-Value : < 2.2e-16
##
## Sensitivity : 0.5861
## Specificity : 0.6343
## Pos Pred Value : 0.6172
## Neg Pred Value : 0.6037
## Prevalence : 0.5015
## Detection Rate : 0.2939
## Detection Prevalence : 0.4762
## Balanced Accuracy : 0.6102
##
## 'Positive' Class : No
##

#Naive Bayes

train_control <- caret::trainControl(
 method = "cv",
 number = 10,
 search = "grid",
 summaryFunction = twoClassSummary,
 returnResamp = "none",
 classProbs = TRUE,
 savePredictions = TRUE,
 verboseIter = FALSE,
 allowParallel = TRUE
)

nBmodel <- train(fatal_od_case ~ .,
 data = train.set,
 method = "nb",
 trControl = train_control
 )

confusionMatrix(nBmodel)

## Cross-Validated (10 fold) Confusion Matrix
##
## (entries are percentual average cell counts across resamples)
##
## Reference
## Prediction No Yes
## No 27.1 17.9
## Yes 23.1 32.0
##
## Accuracy (average) : 0.5904

confusionMatrix(nBmodel$pred$pred, nBmodel$pred$obs)

## Confusion Matrix and Statistics
##
## Reference
## Prediction No Yes
## No 14459 9764
## Yes 11293 15836
##
## Accuracy : 0.5899
## 95% CI : (0.5857, 0.5942)
## No Information Rate : 0.5015
## P-Value [Acc > NIR] : < 2.2e-16
##
## Kappa : 0.18
##
## Mcnemar's Test P-Value : < 2.2e-16
##
## Sensitivity : 0.5615
## Specificity : 0.6186
## Pos Pred Value : 0.5969
## Neg Pred Value : 0.5837
## Prevalence : 0.5015
## Detection Rate : 0.2816
## Detection Prevalence : 0.4717
## Balanced Accuracy : 0.5900
##
## 'Positive' Class : No
##

#KNN

grid_default <- expand.grid(k = 1
 )

train_control <- caret::trainControl(
 method = "cv",
 number = 10,
 search = "grid",
 summaryFunction = twoClassSummary,
 returnResamp = "none",
 classProbs = TRUE,
 savePredictions = TRUE,
 verboseIter = FALSE,
 allowParallel = TRUE
)

knnmodel <- train(fatal_od_case ~ .,
 data = train.set,
 method = "knn",
 trControl = train_control,
 tuneGrid = grid_default)

confusionMatrix(knnmodel)

## Cross-Validated (10 fold) Confusion Matrix
##
## (entries are percentual average cell counts across resamples)
##
## Reference
## Prediction No Yes
## No 35.6 5.1
## Yes 14.5 44.8
##
## Accuracy (average) : 0.8039

confusionMatrix(knnmodel$pred$pred, knnmodel$pred$obs)

## Confusion Matrix and Statistics
##
## Reference
## Prediction No Yes
## No 9148 1308
## Yes 3728 11492
##
## Accuracy : 0.8039
## 95% CI : (0.799, 0.8087)
## No Information Rate : 0.5015
## P-Value [Acc > NIR] : < 2.2e-16
##
## Kappa : 0.6079
##
## Mcnemar's Test P-Value : < 2.2e-16
##
## Sensitivity : 0.7105
## Specificity : 0.8978
## Pos Pred Value : 0.8749
## Neg Pred Value : 0.7551
## Prevalence : 0.5015
## Detection Rate : 0.3563
## Detection Prevalence : 0.4072
## Balanced Accuracy : 0.8041
##
## 'Positive' Class : No
##

#Testing for the best performing model

#Xgboost
predt <- predict(XGBoostmodel, test.setog)
confusionMatrix(predt, test.setog$fatal_od_case, positive = "Yes")

## Confusion Matrix and Statistics
##
## Reference
## Prediction No Yes
## No 5968 939
## Yes 3073 1023
##
## Accuracy : 0.6354
## 95% CI : (0.6263, 0.6444)
## No Information Rate : 0.8217
## P-Value [Acc > NIR] : 1
##
## Kappa : 0.1273
##
## Mcnemar's Test P-Value : <2e-16
##
## Sensitivity : 0.52141
## Specificity : 0.66010
## Pos Pred Value : 0.24976
## Neg Pred Value : 0.86405
## Prevalence : 0.17832
## Detection Rate : 0.09297
## Detection Prevalence : 0.37226
## Balanced Accuracy : 0.59076
##
## 'Positive' Class : Yes
##

prob <- predict(XGBoostmodel, test.setog, type = "prob")
results.roc <- roc(test.setog$fatal_od_case, prob$Yes)
auc(results.roc)

## Area under the curve: 0.6212

plot(results.roc, print.thres = "best", printe.thres.best.method = "closest.topleft")


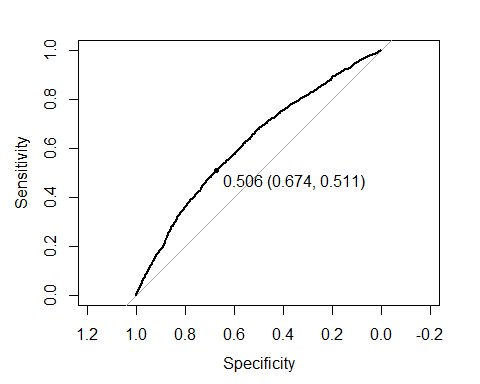


results.coords <- coords(results.roc,"best", best.method = "closest.topleft")
print(results.coords)

## threshold specificity sensitivity
## 1 0.4573449 0.5918593 0.588685

#RF
rf1t <- predict(rf1, test.setog)
confusionMatrix(rf1t, test.setog$fatal_od_case, positive = "Yes")

## Confusion Matrix and Statistics
##
## Reference
## Prediction No Yes
## No 6535 1070
## Yes 2506 892
##
## Accuracy : 0.675
## 95% CI : (0.6662, 0.6837)
## No Information Rate : 0.8217
## P-Value [Acc > NIR] : 1
##
## Kappa : 0.1379
##
## Mcnemar's Test P-Value : <2e-16
##
## Sensitivity : 0.45464
## Specificity : 0.72282
## Pos Pred Value : 0.26251
## Neg Pred Value : 0.85930
## Prevalence : 0.17832
## Detection Rate : 0.08107
## Detection Prevalence : 0.30882
## Balanced Accuracy : 0.58873
##
## 'Positive' Class : Yes
##

prob <- predict(rf1, test.setog, type = "prob")
results.roc1 <- roc(test.setog$fatal_od_case, prob$Yes)
auc(results.roc1)

## Area under the curve: 0.6352

plot(results.roc1, print.thres = "best", printe.thres.best.method = "closest.topleft")


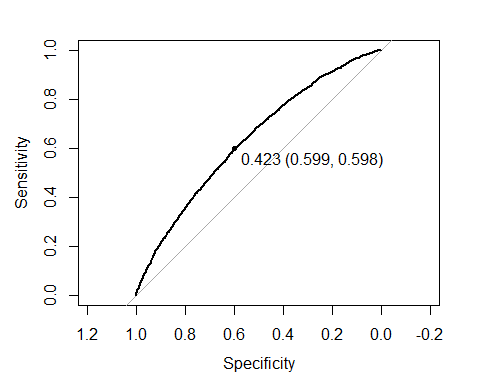


results.coords <- coords(results.roc1,"best", best.method = "closest.topleft")
print(results.coords)

## threshold specificity sensitivity
## 1 0.4231978 0.5991594 0.598369

#AdaBag
adat <- predict(ada, test.setog)
confusionMatrix(adat, test.setog$fatal_od_case, positive = "Yes")

## Confusion Matrix and Statistics
##
## Reference
## Prediction No Yes
## No 5734 869
## Yes 3036 1080
##
## Accuracy : 0.6357
## 95% CI : (0.6269, 0.645)
## No Information Rate : 0.8217
## P-Value [Acc > NIR] : 1
##
## Kappa : 0.1433
##
## Mcnemar's Test P-Value : <2e-16
##
## Sensitivity : 0.55413
## Specificity : 0.65382
## Pos Pred Value : 0.26239
## Neg Pred Value : 0.86839
## Prevalence : 0.17832
## Detection Rate : 0.09879
## Detection Prevalence : 0.38326
## Balanced Accuracy : 0.60391
##
## 'Positive' Class : Yes
##

prob <- predict(ada, test.setog, type = "prob")
results.roc2 <- roc(test.setog$fatal_od_case, prob$Yes)
auc(results.roc2)

## Area under the curve: 0.6424

plot(results.roc2, print.thres = "best", printe.thres.best.method = "closest.topleft")


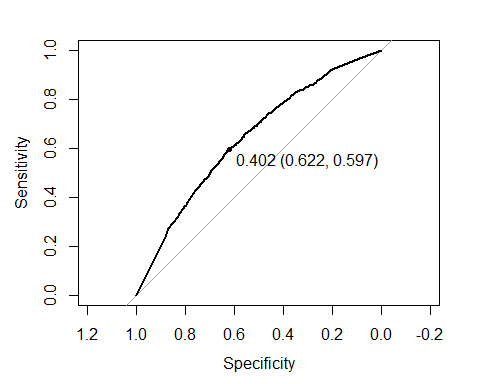


results.coords <- coords(results.roc2,"best", best.method = "closest.topleft")
print(results.coords)

## threshold specificity sensitivity
## 1 0.4016667 0.6218339 0.59684

#Support Vector Machine

svmpt <- predict(svmmodel, test.setog)
confusionMatrix(factor(svmpt),factor(test.setog$fatal_od_case))

## Confusion Matrix and Statistics
##
## Reference
## Prediction No Yes
## No 5396 724
## Yes 3916 1251
##
## Accuracy : 0.5889
## 95% CI : (0.5798, 0.598)
## No Information Rate : 0.825
## P-Value [Acc > NIR] : 1
##
## Kappa : 0.1301
##
## Mcnemar's Test P-Value : <2e-16
##
## Sensitivity : 0.5795
## Specificity : 0.6334
## Pos Pred Value : 0.8817
## Neg Pred Value : 0.2421
## Prevalence : 0.8250
## Detection Rate : 0.4781
## Detection Prevalence : 0.5422
## Balanced Accuracy : 0.6064
##
## 'Positive' Class : No
##

prob <- predict(svmmodel, test.setog, type = "prob")
results.roc3 <- roc(test.setog$fatal_od_case, prob$Yes)
auc(results.roc3)

## Area under the curve: 0.6542

plot(results.roc3, print.thres = "best", printe.thres.best.method = "closest.topleft")


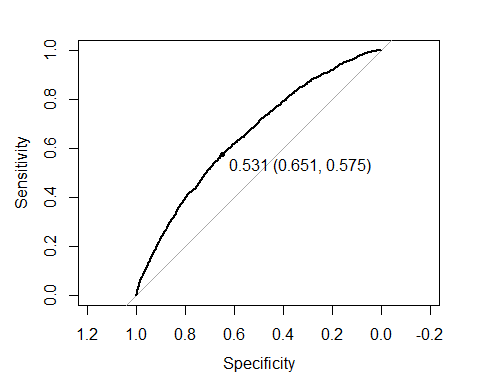


results.coords <- coords(results.roc3,"best", best.method = "closest.topleft")
print(results.coords)

## threshold specificity sensitivity
## 1 0.5282977 0.647122 0.5792405

#Logistic Regression
LogitModelt <- predict(LogitModel, newdata = test.setog)
confusionMatrix(LogitModelt, test.setog$fatal_od_case, positive = "Yes")

## Confusion Matrix and Statistics
##
## Reference
## Prediction No Yes
## No 5368 740
## Yes 3673 1222
##
## Accuracy : 0.5989
## 95% CI : (0.5897, 0.6081)
## No Information Rate : 0.8217
## P-Value [Acc > NIR] : 1
##
## Kappa : 0.1366
##
## Mcnemar's Test P-Value : <2e-16
##
## Sensitivity : 0.6228
## Specificity : 0.5937
## Pos Pred Value : 0.2496
## Neg Pred Value : 0.8788
## Prevalence : 0.1783
## Detection Rate : 0.1111
## Detection Prevalence : 0.4449
## Balanced Accuracy : 0.6083
##
## 'Positive' Class : Yes
##

prob <- predict(LogitModel, test.setog, type = "prob")
results.roc4 <- roc(test.setog$fatal_od_case, prob$Yes)
auc(results.roc4)

## Area under the curve: 0.6499

plot(results.roc4, print.thres = "best", printe.thres.best.method = "closest.topleft")


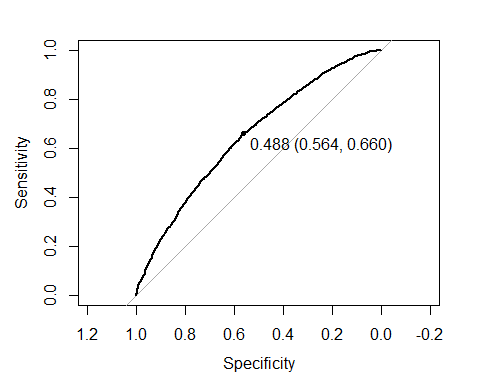


results.coords <- coords(results.roc4,"best", best.method = "closest.topleft")
print(results.coords)

## threshold specificity sensitivity
## 1 0.5077293 0.6107731 0.6075433

#GBM
gbmt <- predict(gbm, newdata = test.setog)
confusionMatrix(gbmt, test.setog$fatal_od_case, positive = "Yes")

## Confusion Matrix and Statistics
##
## Reference
## Prediction No Yes
## No 5475 759
## Yes 3566 1203
##
## Accuracy : 0.6069
## 95% CI : (0.5977, 0.6161)
## No Information Rate : 0.8217
## P-Value [Acc > NIR] : 1
##
## Kappa : 0.1402
##
## Mcnemar's Test P-Value : <2e-16
##
## Sensitivity : 0.6131
## Specificity : 0.6056
## Pos Pred Value : 0.2523
## Neg Pred Value : 0.8782
## Prevalence : 0.1783
## Detection Rate : 0.1093
## Detection Prevalence : 0.4334
## Balanced Accuracy : 0.6094
##
## 'Positive' Class : Yes
##

prob <- predict(gbm, test.setog, type = "prob")
results.roc5 <- roc(test.setog$fatal_od_case, prob$Yes)
auc(results.roc5)

## Area under the curve: 0.6612

plot(results.roc5, print.thres = "best", printe.thres.best.method = "closest.topleft")


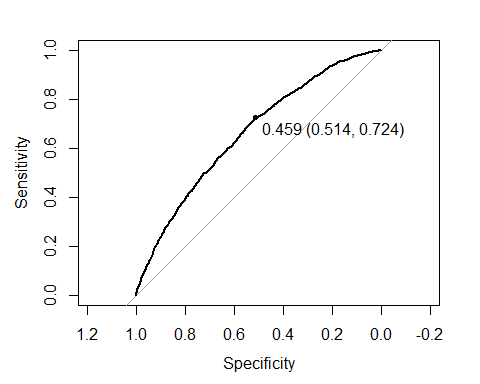


results.coords <- coords(results.roc5,"best", best.method = "closest.topleft")
print(results.coords)

## threshold specificity sensitivity
## 1 0.4891762 0.5813516 0.648318

#Naive Bayes
Nbpt <- predict(nBmodel, newdata = test.setog)
confusionMatrix(Nbpt, test.setog$fatal_od_case, positive = "Yes")

## Confusion Matrix and Statistics
##
## Reference
## Prediction No Yes
## No 5073 767
## Yes 3968 1195
##
## Accuracy : 0.5697
## 95% CI : (0.5603, 0.5789)
## No Information Rate : 0.8217
## P-Value [Acc > NIR] : 1
##
## Kappa : 0.1039
##
## Mcnemar's Test P-Value : <2e-16
##
## Sensitivity : 0.6091
## Specificity : 0.5611
## Pos Pred Value : 0.2315
## Neg Pred Value : 0.8687
## Prevalence : 0.1783
## Detection Rate : 0.1086
## Detection Prevalence : 0.4692
## Balanced Accuracy : 0.5851
##
## 'Positive' Class : Yes
##

prob <- predict(nBmodel, test.setog, type = "prob")
results.roc6 <- roc(test.setog$fatal_od_case, prob$Yes)
auc(results.roc6)

## Area under the curve: 0.6268

plot(results.roc6, print.thres = "best", printe.thres.best.method = "closest.topleft")


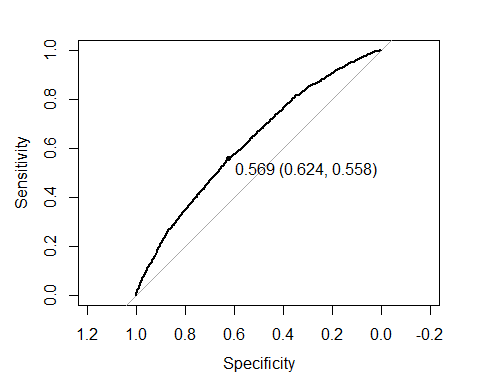


results.coords <- coords(results.roc6,"best", best.method = "closest.topleft")
print(results.coords)

## threshold specificity sensitivity
## 1 0.5692031 0.6242672 0.558104

#KNN
Knnpt <- predict(knnmodel, newdata = test.setog)
confusionMatrix(Knnpt, test.setog$fatal_od_case, positive = "Yes")

## Confusion Matrix and Statistics
##
## Reference
## Prediction No Yes
## No 5530 986
## Yes 3511 976
##
## Accuracy : 0.5913
## 95% CI : (0.582, 0.6005)
## No Information Rate : 0.8217
## P-Value [Acc > NIR] : 1
##
## Kappa : 0.0726
##
## Mcnemar's Test P-Value : <2e-16
##
## Sensitivity : 0.4975
## Specificity : 0.6117
## Pos Pred Value : 0.2175
## Neg Pred Value : 0.8487
## Prevalence : 0.1783
## Detection Rate : 0.0887
## Detection Prevalence : 0.4078
## Balanced Accuracy : 0.5546
##
## 'Positive' Class : Yes
##

prob <- predict(knnmodel, test.setog, type = "prob")
results.roc7 <- roc(test.setog$fatal_od_case, prob$Yes)
auc(results.roc7)

## Area under the curve: 0.5602

plot(results.roc7, print.thres = "best", printe.thres.best.method = "closest.topleft")


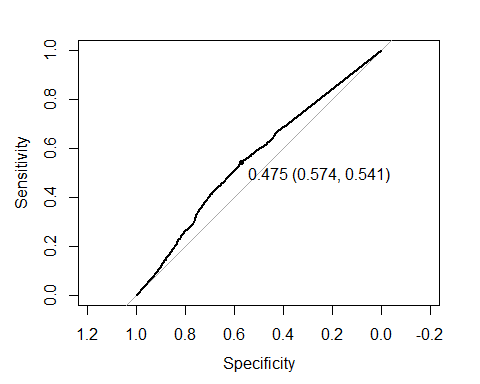


results.coords <- coords(results.roc7,"best", best.method = "closest.topleft")
print(results.coords)

## threshold specificity sensitivity
## 1 0.4753834 0.5737197 0.5407747

ML deep learning with Keras

library(keras)
library(tensorflow)
library(rlang)
library(tidyverse)

## -- Attaching core tidyverse packages ------------------------ tidyverse 2.0.0 --
## v dplyr 1.1.2 v readr 2.1.4
## v forcats 1.0.0 v stringr 1.5.0
## v ggplot2 3.4.2 v tibble 3.2.1
## v lubridate 1.9.2 v tidyr 1.3.0
## v purrr 1.0.1
## -- Conflicts ------------------------------------------ tidyverse_conflicts() --
## x purrr::%@%() masks rlang::%@%()
## x dplyr::filter() masks stats::filter()
## x purrr::flatten() masks rlang::flatten()
## x purrr::flatten_chr() masks rlang::flatten_chr()
## x purrr::flatten_dbl() masks rlang::flatten_dbl()
## x purrr::flatten_int() masks rlang::flatten_int()
## x purrr::flatten_lgl() masks rlang::flatten_lgl()
## x purrr::flatten_raw() masks rlang::flatten_raw()
## x purrr::invoke() masks rlang::invoke()
## x dplyr::lag() masks stats::lag()
## x purrr::splice() masks rlang::splice()
## i Use the conflicted package (<http://conflicted.r-lib.org/>) to force all conflicts to become errors

library(dplyr)
library(gapminder)
library(caret)

## Loading required package: lattice
##
## Attaching package: 'caret'
##
## The following object is masked from 'package:purrr':
##
## lift
##
## The following object is masked from 'package:tensorflow':
##
## train

library(xgboost)

##
## Attaching package: 'xgboost'
##
## The following object is masked from 'package:dplyr':
##
## slice

library(forcats)
library(mice)

##
## Attaching package: 'mice'
##
## The following object is masked from 'package:stats':
##
## filter
##
## The following objects are masked from 'package:base':
##
## cbind, rbind

library(vctrs)

##
## Attaching package: 'vctrs'
##
## The following object is masked from 'package:dplyr':
##
## data_frame
##
## The following object is masked from 'package:tibble':
##
## data_frame

library(naniar)
library(yardstick)

## For binary classification, the first factor level is assumed to be the event.
## Use the argument `event_level = "second"` to alter this as needed.
##
## Attaching package: 'yardstick'
##
## The following objects are masked from 'package:caret':
##
## precision, recall, sensitivity, specificity
##
## The following object is masked from 'package:readr':
##
## spec
##
## The following object is masked from 'package:keras':
##
## get_weights

library(forcats)

datasettrain <- read_csv("U:/Andy's Thesis/MLoverdose/bothsample_rose_train_1.csv" , show_col_types = FALSE)

datasettest <- read_csv("U:/Andy's Thesis/MLoverdose/test.set.csv" , show_col_types = FALSE)

train.set <- datasettrain
test.set <- datasettest

dim(train.set)

## [1] 25676 50

dim(test.set)

## [1] 11003 50

nrow(train.set)

## [1] 25676

train.set = train.set %>% mutate_if(is.character, as.factor)
test.set = test.set %>% mutate_if(is.character, as.factor)

class(train.set$fatal_od_case)

## [1] "numeric"

class(test.set$fatal_od_case)

## [1] "numeric"

table(train.set$fatal_od_case)

##
## 0 1
## 12876 12800

table(test.set$fatal_od_case)

##
## 0 1
## 9041 1962

x_train_tbl <- train.set %>%
 select(-fatal_od_case)

x_test_tbl <- test.set %>%
 select(-fatal_od_case)

y_train_vec <- train.set %>%
 select(fatal_od_case)

y_test_vec <- test.set %>%
 select(fatal_od_case)

glimpse(x_train_tbl)

## Rows: 25,676
## Columns: 49

model_keras <- keras_model_sequential()

model_keras %>%
 layer_dense(
 units = 49,
 activation = "relu",
 input_shape = ncol(x_train_tbl)) %>%
 layer_dropout(rate = 0.001) %>%
 layer_dense(
 units = 49,
 activation = "relu") %>%
 layer_dropout(rate = 0.001) %>%
 layer_dense(
 units = 49,
 activation = "relu") %>%
 layer_dropout(rate = 0.001) %>%
 layer_dense(
 units = 49,
 activation = "relu") %>%
 layer_dropout(rate = 0.001) %>%
 layer_dense(
 units = 49,
 activation = "relu") %>%
 layer_dropout(rate = 0.001) %>%
 layer_dense(
 units = 1,
 activation = "sigmoid") %>%
 compile(
 optimizer = 'adam',
 loss = 'binary_crossentropy',
 metrics = c('accuracy')
 )

model_keras

## Model
## ________________________________________________________________________________
## Layer (type) Output Shape Param #
## ================================================================================
## dense_5 (Dense) (None, 49) 2450
## ________________________________________________________________________________
## dropout_4 (Dropout) (None, 49) 0
## ________________________________________________________________________________
## dense_4 (Dense) (None, 49) 2450
## ________________________________________________________________________________
## dropout_3 (Dropout) (None, 49) 0
## ________________________________________________________________________________
## dense_3 (Dense) (None, 49) 2450
## ________________________________________________________________________________
## dropout_2 (Dropout) (None, 49) 0
## ________________________________________________________________________________
## dense_2 (Dense) (None, 49) 2450
## ________________________________________________________________________________
## dropout_1 (Dropout) (None, 49) 0
## ________________________________________________________________________________
## dense_1 (Dense) (None, 49) 2450
## ________________________________________________________________________________
## dropout (Dropout) (None, 49) 0
## ________________________________________________________________________________
## dense (Dense) (None, 1) 50
## ================================================================================
## Total params: 12,300
## Trainable params: 12,300
## Non-trainable params: 0
## ________________________________________________________________________________

history <- fit(
 object = model_keras,
 x = as.matrix(x_train_tbl),
 y = as.matrix(y_train_vec),
 batch_size = 300,
 epochs = 1000,
 validation_split = 0.3
)

print(history)

## Trained on 17,973 samples (batch_size=300, epochs=1,000)
## Final epoch (plot to see history):
## loss: 0.1669
## acc: 0.9164
## val_loss: 1.656
## val_acc: 0.6037

plot(history)

## `geom_smooth()` using formula = 'y ~ x'


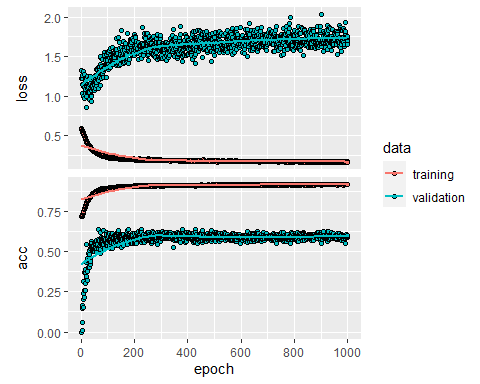


yhat_keras_class_vec <- predict_classes(object = model_keras, x = as.matrix(x_test_tbl)) %>%
 as.vector()

yhat_keras_prob_vec <- predict_proba(object = model_keras, x = as.matrix(x_test_tbl)) %>%
 as.vector()

estimates_tbl <- y_test_vec %>%
 add_column(
 estimate = as.factor(yhat_keras_class_vec),
 class_prob = yhat_keras_prob_vec
)

estimates_tbl

## # A tibble: 11,003 x 3
## fatal_od_case estimate class_prob
## <dbl> <fct> <dbl>
## 1 0 0 0
## 2 0 0 0.000147
## 3 0 0 0.000000209
## 4 0 0 0
## 5 0 0 0.0166
## 6 0 0 0.000725
## 7 0 0 0.0000177
## 8 0 0 0
## 9 0 0 0.000000864
## 10 0 0 0.0000315
## # i 10,993 more rows

estimates_tbl = estimates_tbl %>% mutate_at(vars(fatal_od_case), list(factor))
class(estimates_tbl$fatal_od_case)

## [1] "factor"

levels(estimates_tbl$fatal_od_case)

## [1] "0" "1"

levels(estimates_tbl$estimate)

## [1] "0" "1"

options(yardstick.event_first = FALSE)

estimates_tbl %>% conf_mat(fatal_od_case, estimate)

## Truth
## Prediction 0 1
## 0 7338 1467
## 1 1703 495

estimates_tbl %>% metrics(fatal_od_case, estimate)

## # A tibble: 2 x 3
## .metric .estimator .estimate
## <chr> <chr> <dbl>
## 1 accuracy binary 0.712
## 2 kap binary 0.0611

estimates_tbl %>% roc_auc(fatal_od_case, class_prob)

## Warning: The `yardstick.event_first` option has been deprecated as of yardstick 0.0.7 and will be completely ignored in a future version.
## Instead, set the following argument directly in the metric function:
## `options(yardstick.event_first = TRUE)` -> `event_level = 'first'` (the default)
## `options(yardstick.event_first = FALSE)` -> `event_level = 'second'`
## This warning is displayed once per session.

## # A tibble: 1 x 3
## .metric .estimator .estimate
## <chr> <chr> <dbl>
## 1 roc_auc binary 0.576

ML modeling with Tidy models

library(keras)
library(tensorflow)
library(rlang)
library(tidyverse)
library(dplyr)
library(gapminder)
library(xgboost)
library(forcats)
library(mice)
library(vctrs)
library(naniar)
library(yardstick)
library(forcats)
library(Boruta)
library(ROSE)
library(imbalance)
library(rnn)
library(ROCR)
library(SHAPforxgboost)
library(randomForest)
library(mlbench)
library(ggplot2)
library(data.table)
library(here)
library(tidymodels)
library(parsnip)
library(caret)
library(kknn)
library(yardstick)
library(tune)

###Testing the original sample

datasettrain <- read_csv("U:/Andy's Thesis/MLoverdose/train.set.csv" , show_col_types = FALSE)

datasettest <- read_csv("U:/Andy's Thesis/MLoverdose/test.set.csv" , show_col_types = FALSE)

datasettrain <- datasettrain %>%
 mutate(fatal_od_case = recode(fatal_od_case, "0" = "No", "1" = "Yes"))

datasettest <- datasettest %>%
 mutate(fatal_od_case = recode(fatal_od_case, "0" = "No", "1" = "Yes"))

train.set <- datasettrain
test.set <- datasettest

dim(train.set)

## [1] 25676 50

dim(test.set)

## [1] 11003 50

nrow(train.set)

## [1] 25676

train.set = train.set %>% mutate_if(is.character, as.factor)
test.set = test.set %>% mutate_if(is.character, as.factor)

class(train.set$fatal_od_case)

## [1] "factor"

class(test.set$fatal_od_case)

## [1] "factor"

table(train.set$fatal_od_case)

##
## No Yes
## 21212 4464

#XGBoost

xgb_spec <- boost_tree(
 trees = 300) %>%
 set_engine("xgboost") %>%
 set_mode("classification")

overdose_rec <-
 recipe(fatal_od_case ~., data = train.set)


xgbworkflow <- workflow() %>%
 add_model(xgb_spec) %>%
 add_recipe(overdose_rec)

xgb_fit <- xgbworkflow %>%
 fit(data = train.set)

class_pred <- predict(xgb_fit, test.set)
prob_pred <- predict(xgb_fit, test.set, type="prob")
predictions <- data.frame(class_pred, prob_pred) %>%
 setNames(c("XGB_Class", "LR_DeathProb", "R_NotDeathProb"))

ODD_preds <- test.set %>%
 bind_cols(predictions)

caret::confusionMatrix(ODD_preds$XGB_Class, ODD_preds$fatal_od_case, positive = "Yes")

## Confusion Matrix and Statistics
##
## Reference
## Prediction No Yes
## No 8789 1848
## Yes 252 114
##
## Accuracy : 0.8091
## 95% CI : (0.8017, 0.8164)
## No Information Rate : 0.8217
## P-Value [Acc > NIR] : 0.9997
##
## Kappa : 0.0444
##
## Mcnemar's Test P-Value : <2e-16
##
## Sensitivity : 0.05810
## Specificity : 0.97213
## Pos Pred Value : 0.31148
## Neg Pred Value : 0.82627
## Prevalence : 0.17832
## Detection Rate : 0.01036
## Detection Prevalence : 0.03326
## Balanced Accuracy : 0.51512
##
## 'Positive' Class : Yes
##

#Random Forest

rf_mod <-
 rand_forest(trees=500) %>%
 set_engine("ranger") %>%
 set_mode("classification")

rf_fit <-
 rf_mod %>%
 fit(fatal_od_case ~., data = train.set)

class_pred <- predict(rf_fit, test.set)
prob_pred <- predict(rf_fit, test.set, type="prob")
predictions <- data.frame(class_pred, prob_pred) %>%
 setNames(c("RF_Class", "RF_DeathProb", "RF_NotDeathProb"))

ODD_preds <- test.set %>%
 bind_cols(predictions)

table(ODD_preds$fatal_od_case)

##
## No Yes
## 9041 1962

caret::confusionMatrix(ODD_preds$RF_Class, ODD_preds$fatal_od_case, positive = "Yes")

## Confusion Matrix and Statistics
##
## Reference
## Prediction No Yes
## No 9014 1929
## Yes 27 33
##
## Accuracy : 0.8222
## 95% CI : (0.815, 0.8293)
## No Information Rate : 0.8217
## P-Value [Acc > NIR] : 0.4466
##
## Kappa : 0.0223
##
## Mcnemar's Test P-Value : <2e-16
##
## Sensitivity : 0.016820
## Specificity : 0.997014
## Pos Pred Value : 0.550000
## Neg Pred Value : 0.823723
## Prevalence : 0.178315
## Detection Rate : 0.002999
## Detection Prevalence : 0.005453
## Balanced Accuracy : 0.506917
##
## 'Positive' Class : Yes
##

###Testing Different Samples

##Undersample 3:1

undersample_rose_train_1 <- read_csv("U:/Andy's Thesis/MLoverdose/undersample_rose_train_1.csv" , show_col_types = FALSE)

undersample_rose_train_1 <- undersample_rose_train_1 %>%
 mutate(fatal_od_case = recode(fatal_od_case, "0" = "No", "1" = "Yes"))

train.set <- undersample_rose_train_1

train.set = train.set %>% mutate_if(is.character, as.factor)

dim(train.set)

## [1] 16503 50

dim(test.set)

## [1] 11003 50

nrow(train.set)

## [1] 16503

#XGBoost

xgb_spec <- boost_tree(
 trees = 300) %>%
 set_engine("xgboost") %>%
 set_mode("classification")

overdose_rec <-
 recipe(fatal_od_case ~., data = train.set)


xgbworkflow <- workflow() %>%
 add_model(xgb_spec) %>%
 add_recipe(overdose_rec)

xgb_fit <- xgbworkflow %>%
 fit(data = train.set)

class_pred <- predict(xgb_fit, test.set)
prob_pred <- predict(xgb_fit, test.set, type="prob")
predictions <- data.frame(class_pred, prob_pred) %>%
 setNames(c("XGB_Class", "LR_DeathProb", "R_NotDeathProb"))

ODD_preds <- test.set %>%
 bind_cols(predictions)

caret::confusionMatrix(ODD_preds$XGB_Class, ODD_preds$fatal_od_case, positive = "Yes")

## Confusion Matrix and Statistics
##
## Reference
## Prediction No Yes
## No 8203 1626
## Yes 838 336
##
## Accuracy : 0.7761
## 95% CI : (0.7682, 0.7838)
## No Information Rate : 0.8217
## P-Value [Acc > NIR] : 1
##
## Kappa : 0.0932
##
## Mcnemar's Test P-Value : <2e-16
##
## Sensitivity : 0.17125
## Specificity : 0.90731
## Pos Pred Value : 0.28620
## Neg Pred Value : 0.83457
## Prevalence : 0.17832
## Detection Rate : 0.03054
## Detection Prevalence : 0.10670
## Balanced Accuracy : 0.53928
##
## 'Positive' Class : Yes
##

class(train.set$fatal_od_case)

## [1] "factor"

class(test.set$fatal_od_case)

## [1] "factor"

class(class_pred$.pred_class)

## [1] "factor"

class_pred <- predict(xgb_fit, test.set)
caret::confusionMatrix(class_pred$.pred_class, test.set$fatal_od_case)

## Confusion Matrix and Statistics
##
## Reference
## Prediction No Yes
## No 8203 1626
## Yes 838 336
##
## Accuracy : 0.7761
## 95% CI : (0.7682, 0.7838)
## No Information Rate : 0.8217
## P-Value [Acc > NIR] : 1
##
## Kappa : 0.0932
##
## Mcnemar's Test P-Value : <2e-16
##
## Sensitivity : 0.9073
## Specificity : 0.1713
## Pos Pred Value : 0.8346
## Neg Pred Value : 0.2862
## Prevalence : 0.8217
## Detection Rate : 0.7455
## Detection Prevalence : 0.8933
## Balanced Accuracy : 0.5393
##
## 'Positive' Class : No
##

#Random Forest

rf_mod <-
 rand_forest(trees=500) %>%
 set_engine("ranger") %>%
 set_mode("classification")

rf_fit <-
 rf_mod %>%
 fit(fatal_od_case ~., data = train.set)

class_pred <- predict(rf_fit, test.set)
prob_pred <- predict(rf_fit, test.set, type="prob")
predictions <- data.frame(class_pred, prob_pred) %>%
 setNames(c("RF_Class", "RF_DeathProb", "RF_NotDeathProb"))

ODD_preds <- test.set %>%
 bind_cols(predictions)

caret::confusionMatrix(ODD_preds$RF_Class, ODD_preds$fatal_od_case, positive = "Yes")

## Confusion Matrix and Statistics
##
## Reference
## Prediction No Yes
## No 8758 1804
## Yes 283 158
##
## Accuracy : 0.8103
## 95% CI : (0.8029, 0.8176)
## No Information Rate : 0.8217
## P-Value [Acc > NIR] : 0.999
##
## Kappa : 0.0707
##
## Mcnemar's Test P-Value : <2e-16
##
## Sensitivity : 0.08053
## Specificity : 0.96870
## Pos Pred Value : 0.35828
## Neg Pred Value : 0.82920
## Prevalence : 0.17832
## Detection Rate : 0.01436
## Detection Prevalence : 0.04008
## Balanced Accuracy : 0.52461
##
## 'Positive' Class : Yes
##

class_pred <- predict(rf_fit, test.set)
caret::confusionMatrix(class_pred$.pred_class, test.set$fatal_od_case, positive = "Yes")

## Confusion Matrix and Statistics
##
## Reference
## Prediction No Yes
## No 8758 1804
## Yes 283 158
##
## Accuracy : 0.8103
## 95% CI : (0.8029, 0.8176)
## No Information Rate : 0.8217
## P-Value [Acc > NIR] : 0.999
##
## Kappa : 0.0707
##
## Mcnemar's Test P-Value : <2e-16
##
## Sensitivity : 0.08053
## Specificity : 0.96870
## Pos Pred Value : 0.35828
## Neg Pred Value : 0.82920
## Prevalence : 0.17832
## Detection Rate : 0.01436
## Detection Prevalence : 0.04008
## Balanced Accuracy : 0.52461
##
## 'Positive' Class : Yes
##

##Undersample 1:1

undersample_rose_train_2 <- read_csv("U:/Andy's Thesis/MLoverdose/undersample_rose_train_2.csv" , show_col_types = FALSE)

undersample_rose_train_2 <- undersample_rose_train_2 %>%
 mutate(fatal_od_case = recode(fatal_od_case, "0" = "No", "1" = "Yes"))

train.set <- undersample_rose_train_2

train.set = train.set %>% mutate_if(is.character, as.factor)

dim(train.set)

## [1] 8917 50

dim(test.set)

## [1] 11003 50

nrow(train.set)

## [1] 8917

#XGBoost

xgb_spec <- boost_tree(
 trees = 300) %>%
 set_engine("xgboost") %>%
 set_mode("classification")

overdose_rec <-
 recipe(fatal_od_case ~., data = train.set)


xgbworkflow <- workflow() %>%
 add_model(xgb_spec) %>%
 add_recipe(overdose_rec)

xgb_fit <- xgbworkflow %>%
 fit(data = train.set)

class_pred <- predict(xgb_fit, test.set)
prob_pred <- predict(xgb_fit, test.set, type="prob")
predictions <- data.frame(class_pred, prob_pred) %>%
 setNames(c("XGB_Class", "LR_DeathProb", "R_NotDeathProb"))

ODD_preds <- test.set %>%
 bind_cols(predictions)

caret::confusionMatrix(ODD_preds$XGB_Class, ODD_preds$fatal_od_case, positive = "Yes")

## Confusion Matrix and Statistics
##
## Reference
## Prediction No Yes
## No 5215 785
## Yes 3826 1177
##
## Accuracy : 0.5809
## 95% CI : (0.5716, 0.5902)
## No Information Rate : 0.8217
## P-Value [Acc > NIR] : 1
##
## Kappa : 0.11
##
## Mcnemar's Test P-Value : <2e-16
##
## Sensitivity : 0.5999
## Specificity : 0.5768
## Pos Pred Value : 0.2353
## Neg Pred Value : 0.8692
## Prevalence : 0.1783
## Detection Rate : 0.1070
## Detection Prevalence : 0.4547
## Balanced Accuracy : 0.5884
##
## 'Positive' Class : Yes
##

class_pred <- predict(xgb_fit, test.set)
caret::confusionMatrix(class_pred$.pred_class, test.set$fatal_od_case, positive = "Yes")

## Confusion Matrix and Statistics
##
## Reference
## Prediction No Yes
## No 5215 785
## Yes 3826 1177
##
## Accuracy : 0.5809
## 95% CI : (0.5716, 0.5902)
## No Information Rate : 0.8217
## P-Value [Acc > NIR] : 1
##
## Kappa : 0.11
##
## Mcnemar's Test P-Value : <2e-16
##
## Sensitivity : 0.5999
## Specificity : 0.5768
## Pos Pred Value : 0.2353
## Neg Pred Value : 0.8692
## Prevalence : 0.1783
## Detection Rate : 0.1070
## Detection Prevalence : 0.4547
## Balanced Accuracy : 0.5884
##
## 'Positive' Class : Yes
##

#Random Forest

rf_mod <-
 rand_forest(trees=500) %>%
 set_engine("ranger") %>%
 set_mode("classification")

rf_fit <-
 rf_mod %>%
 fit(fatal_od_case ~., data = train.set)

class_pred <- predict(rf_fit, test.set)
prob_pred <- predict(rf_fit, test.set, type="prob")
predictions <- data.frame(class_pred, prob_pred) %>%
 setNames(c("RF_Class", "RF_DeathProb", "RF_NotDeathProb"))

ODD_preds <- test.set %>%
 bind_cols(predictions)

caret::confusionMatrix(ODD_preds$RF_Class, ODD_preds$fatal_od_case, positive = "Yes")

## Confusion Matrix and Statistics
##
## Reference
## Prediction No Yes
## No 5512 765
## Yes 3529 1197
##
## Accuracy : 0.6097
## 95% CI : (0.6006, 0.6189)
## No Information Rate : 0.8217
## P-Value [Acc > NIR] : 1
##
## Kappa : 0.1416
##
## Mcnemar's Test P-Value : <2e-16
##
## Sensitivity : 0.6101
## Specificity : 0.6097
## Pos Pred Value : 0.2533
## Neg Pred Value : 0.8781
## Prevalence : 0.1783
## Detection Rate : 0.1088
## Detection Prevalence : 0.4295
## Balanced Accuracy : 0.6099
##
## 'Positive' Class : Yes
##

class_pred <- predict(rf_fit, test.set)
caret::confusionMatrix(class_pred$.pred_class, test.set$fatal_od_case, positive = "Yes")

## Confusion Matrix and Statistics
##
## Reference
## Prediction No Yes
## No 5512 765
## Yes 3529 1197
##
## Accuracy : 0.6097
## 95% CI : (0.6006, 0.6189)
## No Information Rate : 0.8217
## P-Value [Acc > NIR] : 1
##
## Kappa : 0.1416
##
## Mcnemar's Test P-Value : <2e-16
##
## Sensitivity : 0.6101
## Specificity : 0.6097
## Pos Pred Value : 0.2533
## Neg Pred Value : 0.8781
## Prevalence : 0.1783
## Detection Rate : 0.1088
## Detection Prevalence : 0.4295
## Balanced Accuracy : 0.6099
##
## 'Positive' Class : Yes
##

##Bothsample 1:1

bothsample_rose_train_1 <- read_csv("U:/Andy's Thesis/MLoverdose/bothsample_rose_train_1.csv" , show_col_types = FALSE)

bothsample_rose_train_1 <- bothsample_rose_train_1 %>%
 mutate(fatal_od_case = recode(fatal_od_case, "0" = "No", "1" = "Yes"))

train.set <- bothsample_rose_train_1

train.set = train.set %>% mutate_if(is.character, as.factor)

dim(train.set)

## [1] 25676 50

dim(test.set)

## [1] 11003 50

nrow(train.set)

## [1] 25676

#XGBoost

xgb_spec <- boost_tree(
 trees = 300) %>%
 set_engine("xgboost") %>%
 set_mode("classification")

overdose_rec <-
 recipe(fatal_od_case ~., data = train.set)


xgbworkflow <- workflow() %>%
 add_model(xgb_spec) %>%
 add_recipe(overdose_rec)

xgb_fit <- xgbworkflow %>%
 fit(data = train.set)

class_pred <- predict(xgb_fit, test.set)
prob_pred <- predict(xgb_fit, test.set, type="prob")
predictions <- data.frame(class_pred, prob_pred) %>%
 setNames(c("XGB_Class", "LR_DeathProb", "R_NotDeathProb"))

ODD_preds <- test.set %>%
 bind_cols(predictions)

caret::confusionMatrix(ODD_preds$XGB_Class, ODD_preds$fatal_od_case, positive = "Yes")

## Confusion Matrix and Statistics
##
## Reference
## Prediction No Yes
## No 6117 972
## Yes 2924 990
##
## Accuracy : 0.6459
## 95% CI : (0.6369, 0.6549)
## No Information Rate : 0.8217
## P-Value [Acc > NIR] : 1
##
## Kappa : 0.1304
##
## Mcnemar's Test P-Value : <2e-16
##
## Sensitivity : 0.50459
## Specificity : 0.67658
## Pos Pred Value : 0.25294
## Neg Pred Value : 0.86289
## Prevalence : 0.17832
## Detection Rate : 0.08998
## Detection Prevalence : 0.35572
## Balanced Accuracy : 0.59059
##
## 'Positive' Class : Yes
##

class_pred <- predict(xgb_fit, test.set)
caret::confusionMatrix(class_pred$.pred_class, test.set$fatal_od_case, positive = "Yes")

## Confusion Matrix and Statistics
##
## Reference
## Prediction No Yes
## No 6117 972
## Yes 2924 990
##
## Accuracy : 0.6459
## 95% CI : (0.6369, 0.6549)
## No Information Rate : 0.8217
## P-Value [Acc > NIR] : 1
##
## Kappa : 0.1304
##
## Mcnemar's Test P-Value : <2e-16
##
## Sensitivity : 0.50459
## Specificity : 0.67658
## Pos Pred Value : 0.25294
## Neg Pred Value : 0.86289
## Prevalence : 0.17832
## Detection Rate : 0.08998
## Detection Prevalence : 0.35572
## Balanced Accuracy : 0.59059
##
## 'Positive' Class : Yes
##

#Random Forest

rf_mod <-
 rand_forest(trees=500) %>%
 set_engine("ranger") %>%
 set_mode("classification")

rf_fit <-
 rf_mod %>%
 fit(fatal_od_case ~., data = train.set)

class_pred <- predict(rf_fit, test.set)
prob_pred <- predict(rf_fit, test.set, type="prob")
predictions <- data.frame(class_pred, prob_pred) %>%
 setNames(c("RF_Class", "RF_DeathProb", "RF_NotDeathProb"))

ODD_preds <- test.set %>%
 bind_cols(predictions)

caret::confusionMatrix(ODD_preds$RF_Class, ODD_preds$fatal_od_case, positive = "Yes")

## Confusion Matrix and Statistics
##
## Reference
## Prediction No Yes
## No 6520 1054
## Yes 2521 908
##
## Accuracy : 0.6751
## 95% CI : (0.6662, 0.6838)
## No Information Rate : 0.8217
## P-Value [Acc > NIR] : 1
##
## Kappa : 0.1423
##
## Mcnemar's Test P-Value : <2e-16
##
## Sensitivity : 0.46279
## Specificity : 0.72116
## Pos Pred Value : 0.26480
## Neg Pred Value : 0.86084
## Prevalence : 0.17832
## Detection Rate : 0.08252
## Detection Prevalence : 0.31164
## Balanced Accuracy : 0.59198
##
## 'Positive' Class : Yes
##

class_pred <- predict(rf_fit, test.set)
caret::confusionMatrix(class_pred$.pred_class, test.set$fatal_od_case, positive = "Yes")

## Confusion Matrix and Statistics
##
## Reference
## Prediction No Yes
## No 6520 1054
## Yes 2521 908
##
## Accuracy : 0.6751
## 95% CI : (0.6662, 0.6838)
## No Information Rate : 0.8217
## P-Value [Acc > NIR] : 1
##
## Kappa : 0.1423
##
## Mcnemar's Test P-Value : <2e-16
##
## Sensitivity : 0.46279
## Specificity : 0.72116
## Pos Pred Value : 0.26480
## Neg Pred Value : 0.86084
## Prevalence : 0.17832
## Detection Rate : 0.08252
## Detection Prevalence : 0.31164
## Balanced Accuracy : 0.59198
##
## 'Positive' Class : Yes
##

##Oversample 1:1

oversample_rose_train_1 <- read_csv("U:/Andy's Thesis/MLoverdose/oversample_rose_train_1.csv" , show_col_types = FALSE)

oversample_rose_train_1 <- oversample_rose_train_1 %>%
 mutate(fatal_od_case = recode(fatal_od_case, "0" = "No", "1" = "Yes"))

train.set <- oversample_rose_train_1
test.set <- datasettest

train.set = train.set %>% mutate_if(is.character, as.factor)
test.set = test.set %>% mutate_if(is.character, as.factor)

dim(train.set)

## [1] 42230 50

dim(test.set)

## [1] 11003 50

nrow(train.set)

## [1] 42230

#XGBoost

xgb_spec <- boost_tree(
 trees = 300) %>%
 set_engine("xgboost") %>%
 set_mode("classification")

overdose_rec <-
 recipe(fatal_od_case ~., data = train.set)


xgbworkflow <- workflow() %>%
 add_model(xgb_spec) %>%
 add_recipe(overdose_rec)

xgb_fit <- xgbworkflow %>%
 fit(data = train.set)

class_pred <- predict(xgb_fit, test.set)
prob_pred <- predict(xgb_fit, test.set, type="prob")
predictions <- data.frame(class_pred, prob_pred) %>%
 setNames(c("XGB_Class", "LR_DeathProb", "R_NotDeathProb"))

ODD_preds <- test.set %>%
 bind_cols(predictions)

caret::confusionMatrix(ODD_preds$XGB_Class, ODD_preds$fatal_od_case, positive = "Yes")

## Confusion Matrix and Statistics
##
## Reference
## Prediction No Yes
## No 6454 1070
## Yes 2587 892
##
## Accuracy : 0.6676
## 95% CI : (0.6587, 0.6764)
## No Information Rate : 0.8217
## P-Value [Acc > NIR] : 1
##
## Kappa : 0.1293
##
## Mcnemar's Test P-Value : <2e-16
##
## Sensitivity : 0.45464
## Specificity : 0.71386
## Pos Pred Value : 0.25640
## Neg Pred Value : 0.85779
## Prevalence : 0.17832
## Detection Rate : 0.08107
## Detection Prevalence : 0.31619
## Balanced Accuracy : 0.58425
##
## 'Positive' Class : Yes
##

class_pred <- predict(xgb_fit, test.set)
caret::confusionMatrix(class_pred$.pred_class, test.set$fatal_od_case, positive = "Yes")

## Confusion Matrix and Statistics
##
## Reference
## Prediction No Yes
## No 6454 1070
## Yes 2587 892
##
## Accuracy : 0.6676
## 95% CI : (0.6587, 0.6764)
## No Information Rate : 0.8217
## P-Value [Acc > NIR] : 1
##
## Kappa : 0.1293
##
## Mcnemar's Test P-Value : <2e-16
##
## Sensitivity : 0.45464
## Specificity : 0.71386
## Pos Pred Value : 0.25640
## Neg Pred Value : 0.85779
## Prevalence : 0.17832
## Detection Rate : 0.08107
## Detection Prevalence : 0.31619
## Balanced Accuracy : 0.58425
##
## 'Positive' Class : Yes
##

#Random Forest

rf_mod <-
 rand_forest(trees=500) %>%
 set_engine("ranger") %>%
 set_mode("classification")

rf_fit <-
 rf_mod %>%
 fit(fatal_od_case ~., data = train.set)

class_pred <- predict(rf_fit, test.set)
prob_pred <- predict(rf_fit, test.set, type="prob")
predictions <- data.frame(class_pred, prob_pred) %>%
 setNames(c("RF_Class", "RF_DeathProb", "RF_NotDeathProb"))

ODD_preds <- test.set %>%
 bind_cols(predictions)

caret::confusionMatrix(ODD_preds$RF_Class, ODD_preds$fatal_od_case, positive = "Yes")

## Confusion Matrix and Statistics
##
## Reference
## Prediction No Yes
## No 6927 1195
## Yes 2114 767
##
## Accuracy : 0.6993
## 95% CI : (0.6906, 0.7078)
## No Information Rate : 0.8217
## P-Value [Acc > NIR] : 1
##
## Kappa : 0.1328
##
## Mcnemar's Test P-Value : <2e-16
##
## Sensitivity : 0.39093
## Specificity : 0.76618
## Pos Pred Value : 0.26623
## Neg Pred Value : 0.85287
## Prevalence : 0.17832
## Detection Rate : 0.06971
## Detection Prevalence : 0.26184
## Balanced Accuracy : 0.57855
##
## 'Positive' Class : Yes
##

class_pred <- predict(rf_fit, test.set)
caret::confusionMatrix(class_pred$.pred_class, test.set$fatal_od_case, positive = "Yes")

## Confusion Matrix and Statistics
##
## Reference
## Prediction No Yes
## No 6927 1195
## Yes 2114 767
##
## Accuracy : 0.6993
## 95% CI : (0.6906, 0.7078)
## No Information Rate : 0.8217
## P-Value [Acc > NIR] : 1
##
## Kappa : 0.1328
##
## Mcnemar's Test P-Value : <2e-16
##
## Sensitivity : 0.39093
## Specificity : 0.76618
## Pos Pred Value : 0.26623
## Neg Pred Value : 0.85287
## Prevalence : 0.17832
## Detection Rate : 0.06971
## Detection Prevalence : 0.26184
## Balanced Accuracy : 0.57855
##
## 'Positive' Class : Yes
##

###feature selected RF (From Boruta)

bothsample_rose_train_1 <- read_csv("U:/Andy's Thesis/MLoverdose/bothsample_rose_train_1.csv" , show_col_types = FALSE)

bothsample_rose_train_1 <- bothsample_rose_train_1 %>%
 mutate(fatal_od_case = recode(fatal_od_case, "0" = "No", "1" = "Yes"))

train.set <- bothsample_rose_train_1

train.set = train.set %>% mutate_if(is.character, as.factor)

dim(train.set)

## [1] 25676 50

dim(test.set)

## [1] 11003 50

nrow(train.set)

## [1] 25676

train.set <- train.set%>%
 select(fatal_od_case, total_od_n, alzheimer_dementia_date_b, ami_date_b, angina_date_b, ckd_date_b, copd_date_b, depression_date_b, diabetes_date_b, heart_failure_date_b, hypertension_date_b, hosp_stroke_date_b, haemorr_stroke_date_b, isch_stroke_date_b, ihd_date_b, mood_anx_date_b, osteo_arthritis_date_b, osteo_porosis_date_b, ost, substancerelateddisorders.x, Tobaccouse, Cocaineuse, earlyonsetdisorders, Mooddisorders, Multiplementalillness, Neurocognitivedisorders, Neuroticrelateddisorders, Opioiduse, Osteomyelitis, Otherpsychoactivedruguse, Personalitydisorders, Polysubstance, psychoticdisorders, Sepsis, Stimulantuse, Tissueinfection)

test.set <- test.set%>%
 select(fatal_od_case, total_od_n, alzheimer_dementia_date_b, ami_date_b, angina_date_b, ckd_date_b, copd_date_b, depression_date_b, diabetes_date_b, heart_failure_date_b, hypertension_date_b, hosp_stroke_date_b, haemorr_stroke_date_b, isch_stroke_date_b, ihd_date_b, mood_anx_date_b, osteo_arthritis_date_b, osteo_porosis_date_b, ost, substancerelateddisorders.x, Tobaccouse, Cocaineuse, earlyonsetdisorders, Mooddisorders, Multiplementalillness, Neurocognitivedisorders, Neuroticrelateddisorders, Opioiduse, Osteomyelitis, Otherpsychoactivedruguse, Personalitydisorders, Polysubstance, psychoticdisorders, Sepsis, Stimulantuse, Tissueinfection)

rf_mod <-
 rand_forest(trees=500) %>%
 set_engine("ranger") %>%
 set_mode("classification")

rf_fit <-
 rf_mod %>%
 fit(fatal_od_case ~., data = train.set)

class_pred <- predict(rf_fit, test.set)
prob_pred <- predict(rf_fit, test.set, type="prob")
predictions <- data.frame(class_pred, prob_pred) %>%
 setNames(c("RF_Class", "RF_DeathProb", "RF_NotDeathProb"))

ODD_preds <- test.set %>%
 bind_cols(predictions)

caret::confusionMatrix(ODD_preds$RF_Class, ODD_preds$fatal_od_case, positive = "Yes")

## Confusion Matrix and Statistics
##
## Reference
## Prediction No Yes
## No 6466 1044
## Yes 2575 918
##
## Accuracy : 0.6711
## 95% CI : (0.6622, 0.6799)
## No Information Rate : 0.8217
## P-Value [Acc > NIR] : 1
##
## Kappa : 0.1402
##
## Mcnemar's Test P-Value : <2e-16
##
## Sensitivity : 0.46789
## Specificity : 0.71519
## Pos Pred Value : 0.26281
## Neg Pred Value : 0.86099
## Prevalence : 0.17832
## Detection Rate : 0.08343
## Detection Prevalence : 0.31746
## Balanced Accuracy : 0.59154
##
## 'Positive' Class : Yes
##

Validating all the models

bothsample_rose_train_1 <- read_csv("U:/Andy's Thesis/MLoverdose/bothsample_rose_train_1.csv" , show_col_types = FALSE)

bothsample_rose_train_1 <- bothsample_rose_train_1 %>%
 mutate(fatal_od_case = recode(fatal_od_case, "0" = "No", "1" = "Yes"))

datasettest <- read_csv("U:/Andy's Thesis/MLoverdose/test.set.csv" , show_col_types = FALSE)

datasettest <- datasettest %>%
 mutate(fatal_od_case = recode(fatal_od_case, "0" = "No", "1" = "Yes"))

train.set <- bothsample_rose_train_1
test.set <- datasettest

train.set = train.set %>% mutate_if(is.character, as.factor)
test.set = test.set %>% mutate_if(is.character, as.factor)

dim(train.set)

## [1] 25676 50

dim(test.set)

## [1] 11003 50

nrow(train.set)

## [1] 25676

#Xgboost

ten_fold <- vfold_cv(train.set, v=10)

xgb_spec <- boost_tree(
 trees = 300) %>%
 set_engine("xgboost") %>%
 set_mode("classification")

overdose_rec <-
 recipe(fatal_od_case ~., data = train.set)


xgbworkflow <- workflow() %>%
 add_model(xgb_spec) %>%
 add_recipe(overdose_rec)

xgb_fit <- xgbworkflow %>%
 fit(data = train.set)

xgb_fit_rs <-
 xgbworkflow %>%
 fit_resamples(ten_fold)

collect_metrics(xgb_fit_rs)

## # A tibble: 2 x 5
## .metric .estimator mean n std_err
## <chr> <chr> <dbl> <int> <dbl>
## 1 accuracy binary 0.754 10 0.00194
## 2 roc_auc binary 0.839 10 0.00211

#Random Forest

ten_fold <- vfold_cv(train.set, v=10)

rf_spec <- rand_forest(
 trees = 500) %>%
 set_engine("ranger") %>%
 set_mode("classification")

overdose_rec <-
 recipe(fatal_od_case ~., data = train.set)


rfworkflow <- workflow() %>%
 add_model(rf_spec) %>%
 add_recipe(overdose_rec)

rf_fit <- rfworkflow %>%
 fit(data = train.set)

rf_fit_rs <-
 rfworkflow %>%
 fit_resamples(ten_fold)

collect_metrics(rf_fit_rs)

## # A tibble: 2 x 5
## .metric .estimator mean n std_err
## <chr> <chr> <dbl> <int> <dbl>
## 1 accuracy binary 0.799 10 0.00296
## 2 roc_auc binary 0.883 10 0.00240

#Logistic Regression

ten_fold <- vfold_cv(train.set, v=10)

glm_spec <- logistic_reg() %>%
 set_engine("glm") %>%
 translate()

overdose_rec <-
 recipe(fatal_od_case ~., data = train.set)


glmworkflow <- workflow() %>%
 add_model(glm_spec) %>%
 add_recipe(overdose_rec)

glm_fit <- glmworkflow %>%
 fit(data = train.set)

glm_fit_rs <-
 glmworkflow %>%
 fit_resamples(ten_fold)

collect_metrics(glm_fit_rs)

## # A tibble: 2 x 5
## .metric .estimator mean n std_err
## <chr> <chr> <dbl> <int> <dbl>
## 1 accuracy binary 0.606 10 0.00246
## 2 roc_auc binary 0.646 10 0.00165

#KNN

ten_fold <- vfold_cv(train.set, v=10)

knn_spec <- nearest_neighbor() %>%
 set_engine("kknn") %>%
 set_mode("classification") %>%
 translate

overdose_rec <-
 recipe(fatal_od_case ~., data = train.set)


knnworkflow <- workflow() %>%
 add_model(knn_spec) %>%
 add_recipe(overdose_rec)

knn_fit <- knnworkflow %>%
 fit(data = train.set)

knn_fit_rs <-
 knnworkflow %>%
 fit_resamples(ten_fold)

collect_metrics(knn_fit_rs)

## # A tibble: 2 x 5
## .metric .estimator mean n std_err
## <chr> <chr> <dbl> <int> <dbl>
## 1 accuracy binary 0.766 10 0.00252
## 2 roc_auc binary 0.757 10 0.00365

#Testing for the best performing model

### XGBoost
class_pred <- predict(xgb_fit, test.set)
prob_pred <- predict(xgb_fit, test.set, type="prob")
predictions <- data.frame(class_pred, prob_pred) %>%
 setNames(c("XGB_Class", "LR_DeathProb", "R_NotDeathProb"))

ODD_preds <- test.set %>%
 bind_cols(predictions)


cmxgboost <- caret::confusionMatrix(ODD_preds$XGB_Class, ODD_preds$fatal_od_case, positive = "Yes")

print(cmxgboost)

## Confusion Matrix and Statistics
##
## Reference
## Prediction No Yes
## No 6117 972
## Yes 2924 990
##
## Accuracy : 0.6459
## 95% CI : (0.6369, 0.6549)
## No Information Rate : 0.8217
## P-Value [Acc > NIR] : 1
##
## Kappa : 0.1304
##
## Mcnemar's Test P-Value : <2e-16
##
## Sensitivity : 0.50459
## Specificity : 0.67658
## Pos Pred Value : 0.25294
## Neg Pred Value : 0.86289
## Prevalence : 0.17832
## Detection Rate : 0.08998
## Detection Prevalence : 0.35572
## Balanced Accuracy : 0.59059
##
## 'Positive' Class : Yes
##

### RF


class_pred <- predict(rf_fit, test.set)
prob_pred <- predict(rf_fit, test.set, type="prob")
predictions <- data.frame(class_pred, prob_pred) %>%
 setNames(c("rf_Class", "LR_DeathProb", "R_NotDeathProb"))

ODD_preds <- test.set %>%
 bind_cols(predictions)


cmrf <- caret::confusionMatrix(ODD_preds$rf_Class, ODD_preds$fatal_od_case, positive = "Yes")

print(cmrf)

## Confusion Matrix and Statistics
##
## Reference
## Prediction No Yes
## No 6501 1062
## Yes 2540 900
##
## Accuracy : 0.6726
## 95% CI : (0.6638, 0.6814)
## No Information Rate : 0.8217
## P-Value [Acc > NIR] : 1
##
## Kappa : 0.1373
##
## Mcnemar's Test P-Value : <2e-16
##
## Sensitivity : 0.4587
## Specificity : 0.7191
## Pos Pred Value : 0.2616
## Neg Pred Value : 0.8596
## Prevalence : 0.1783
## Detection Rate : 0.0818
## Detection Prevalence : 0.3126
## Balanced Accuracy : 0.5889
##
## 'Positive' Class : Yes
##

### GLM
class_pred <- predict(glm_fit, test.set)
prob_pred <- predict(glm_fit, test.set, type="prob")
predictions <- data.frame(class_pred, prob_pred) %>%
 setNames(c("glm_Class", "LR_DeathProb", "R_NotDeathProb"))

ODD_preds <- test.set %>%
 bind_cols(predictions)

cm <- caret::confusionMatrix(ODD_preds$glm_Class, ODD_preds$fatal_od_case, positive = "Yes")

print(cm)

## Confusion Matrix and Statistics
##
## Reference
## Prediction No Yes
## No 5368 740
## Yes 3673 1222
##
## Accuracy : 0.5989
## 95% CI : (0.5897, 0.6081)
## No Information Rate : 0.8217
## P-Value [Acc > NIR] : 1
##
## Kappa : 0.1366
##
## Mcnemar's Test P-Value : <2e-16
##
## Sensitivity : 0.6228
## Specificity : 0.5937
## Pos Pred Value : 0.2496
## Neg Pred Value : 0.8788
## Prevalence : 0.1783
## Detection Rate : 0.1111
## Detection Prevalence : 0.4449
## Balanced Accuracy : 0.6083
##
## 'Positive' Class : Yes
##

### KNN

class_pred <- predict(knn_fit, test.set)
prob_pred <- predict(knn_fit, test.set, type="prob")
predictions <- data.frame(class_pred, prob_pred) %>%
 setNames(c("knn_Class", "LR_DeathProb", "R_NotDeathProb"))

ODD_preds <- test.set %>%
 bind_cols(predictions)


knncm <- caret::confusionMatrix(ODD_preds$knn_Class, ODD_preds$fatal_od_case, positive = "Yes")

print(knncm)

## Confusion Matrix and Statistics
##
## Reference
## Prediction No Yes
## No 7257 1493
## Yes 1784 469
##
## Accuracy : 0.7022
## 95% CI : (0.6935, 0.7107)
## No Information Rate : 0.8217
## P-Value [Acc > NIR] : 1
##
## Kappa : 0.0394
##
## Mcnemar's Test P-Value : 4.064e-07
##
## Sensitivity : 0.23904
## Specificity : 0.80268
## Pos Pred Value : 0.20817
## Neg Pred Value : 0.82937
## Prevalence : 0.17832
## Detection Rate : 0.04262
## Detection Prevalence : 0.20476
## Balanced Accuracy : 0.52086
##
## 'Positive' Class : Yes
##

ML Prediction Code for Overdose

Data preprocessing

library(tidyverse)
library(dplyr)
library(gapminder)
library(caret)
library(xgboost)
library(forcats)
library(mice)
library(vctrs)
library(naniar)
library(arsenal)
library(janitor)

##loading data

ICDderivedvariables <- read_csv("U:/Andy's Thesis/MLoverdose in general/GeneralodML/og data/ICDderivedvariables.csv" , show_col_types = FALSE)
Pharmanetdinpin <- read_csv("U:/Andy's Thesis/MLoverdose in general/GeneralodML/og data/Pharmanetdinpin.csv" , show_col_types = FALSE)
vw_cdr_case_b <- read_csv("U:/Andy's Thesis/MLoverdose in general/GeneralodML/og data/vw_cdr_case_b.csv" , show_col_types = FALSE)
vw_od_case <- read_csv("U:/Andy's Thesis/MLoverdose in general/GeneralodML/og data/vw_od_case.csv" , show_col_types = FALSE)

glimpse(ICDderivedvariables)

glimpse(Pharmanetdinpin)

## Rows: 57,902,314
## Columns: 3

glimpse(vw_cdr_case_b)

glimpse(vw_od_case)

length(unique(vw_od_case$moh_study_id)) == nrow(vw_od_case)

## [1] TRUE

n_distinct(ICDderivedvariables$moh_study_id)

## [1] 1094483

n_distinct(Pharmanetdinpin$moh_study_id)

## [1] 647873

n_distinct(vw_cdr_case_b$moh_study_id)

## [1] 608182

# dataset1 <- left_join(vw_cdr_case_b, Pharmanetdinpin, by = "moh_study_id")
#
# controls <- left_join(dataset1, ICDderivedvariables, by = "moh_study_id")

#
# length(unique(controls$moh_study_id)) == nrow(controls)
#
# controls1 <- controls %>%
# distinct(moh_study_id, .keep_all = TRUE)
#
# length(unique(controls1$moh_study_id)) == nrow(controls1)
#
# glimpse(controls1)

# controls2 <- controls1 %>%
# select(moh_study_id, ost, rheumatoid_arthritis_date_b, parkinsonism_date_b, osteo_arthritis_date_b, osteo_porosis_date_b, ms_date_b, mood_anx_date_b, isch_stroke_date_b, ihd_date_b, hypertension_date_b, hosp_tia_date_b, hosp_stroke_date_b, heart_failure_date_b, haemorr_stroke_date_b, epilepsy_date_b, diabetes_date_b, depression_date_b, copd_date_b, ckd_date_b, asthma_date_b, angina_date_b, ami_date_b, alzheimer_dementia_date_b, Tobaccouse, Tissueinfection, substancerelateddisorders.x, Stimulantuse, Sepsis, Sedativeandhypnoticuse, psychoticdisorders, Polysubstance, Personalitydisorders, Otherpsychoactivedruguse, Osteomyelitis, Opioiduse, Neuroticrelateddisorders, Neurocognitivedisorders, Multiplementalillness, Mooddisorders, Intellectualdisability, Hallucinogensuse, Endocarditis, earlyonsetdisorders, Developmentdisorders, Cocaineuse, Cannabinoiduse, Behaviouralpsychologicaldisturbances, Alcoholuse)
#
# controls3 <- na.omit(controls2)

# gg_miss_var(controls1)
#
# gg_miss_var(controls3)

# odmohs <- vw_od_case %>%
# select(moh_study_id)

# controls4 <- subset(controls3, !(moh_study_id %in% odmohs$moh_study_id))

# controls5<- sample_n(controls4, 36679)
#
# controls6<- controls5 %>%
# select(-moh_study_id) %>%
# mutate(od_case = 0)

# write.csv(controls4, "controlsbigpool.csv", row.names = FALSE)
# write.csv(controls6, "controls.csv", row.names = FALSE)

controlsbigpool <- read_csv("U:/Andy's Thesis/MLoverdose in general/GeneralodML/controlsbigpool.csv" , show_col_types = FALSE)

glimpse(controlsbigpool)

## Rows: 446,710
## Columns: 49

###pulling OD populationg

dataset2 <- read_csv("U:/Andy's Thesis/MLoverdose in general/GeneralodML/og data/datasetfirst.csv" , show_col_types = FALSE)

controlsbigpool <- read_csv("U:/Andy's Thesis/MLoverdose in general/GeneralodML/controlsbigpool.csv" , show_col_types = FALSE)

glimpse(controlsbigpool)

## Rows: 446,710
## Columns: 49
# controls6 <- read_csv("U:/Andy's Thesis/MLoverdose in general/GeneralodML/controls.csv" , show_col_types = FALSE)

dataset3 <- dataset2 %>%
 distinct(moh_study_id, .keep_all = TRUE)

gg_miss_var(dataset3, show_pct = TRUE)


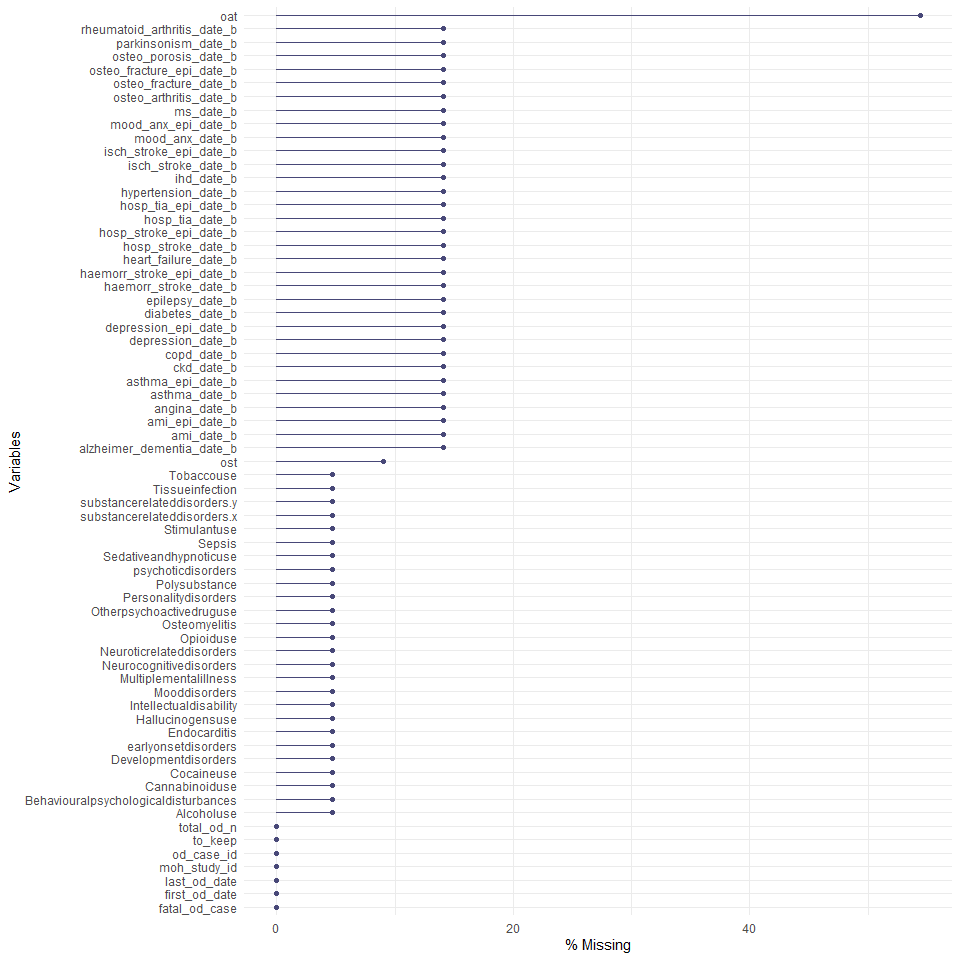


glimpse(dataset3)

## Rows: 36,679
## Columns: 67
na_count <- sapply(dataset3, function(y) sum(length(which(is.na(y)))))

na_count <- data.frame(na_count)

data1 <- dataset3 %>%
 select(moh_study_id, ost, rheumatoid_arthritis_date_b, parkinsonism_date_b, osteo_arthritis_date_b, osteo_porosis_date_b, ms_date_b, mood_anx_date_b, isch_stroke_date_b, ihd_date_b, hypertension_date_b, hosp_tia_date_b, hosp_stroke_date_b, heart_failure_date_b, haemorr_stroke_date_b, epilepsy_date_b, diabetes_date_b, depression_date_b, copd_date_b, ckd_date_b, asthma_date_b, angina_date_b, ami_date_b, alzheimer_dementia_date_b, Tobaccouse, Tissueinfection, substancerelateddisorders.x, Stimulantuse, Sepsis, Sedativeandhypnoticuse, psychoticdisorders, Polysubstance, Personalitydisorders, Otherpsychoactivedruguse, Osteomyelitis, Opioiduse, Neuroticrelateddisorders, Neurocognitivedisorders, Multiplementalillness, Mooddisorders, Intellectualdisability, Hallucinogensuse, Endocarditis, earlyonsetdisorders, Developmentdisorders, Cocaineuse, Cannabinoiduse, Behaviouralpsychologicaldisturbances, Alcoholuse)%>%
 mutate(od_case = 1)


 data2 <- data1[,-1]

controlsbigpool1 <- controlsbigpool %>%
 select(-moh_study_id) %>%
 mutate(od_case = 0)


compare_df_cols(data2, controlsbigpool1)

## column_name data2 controlsbigpool1
## 1 Alcoholuse numeric numeric
## 2 alzheimer_dementia_date_b numeric numeric
## 3 ami_date_b numeric numeric
## 4 angina_date_b numeric numeric
## 5 asthma_date_b numeric numeric
## 6 Behaviouralpsychologicaldisturbances numeric numeric
## 7 Cannabinoiduse numeric numeric
## 8 ckd_date_b numeric numeric
## 9 Cocaineuse numeric numeric
## 10 copd_date_b numeric numeric
## 11 depression_date_b numeric numeric
## 12 Developmentdisorders numeric numeric
## 13 diabetes_date_b numeric numeric
## 14 earlyonsetdisorders numeric numeric
## 15 Endocarditis numeric numeric
## 16 epilepsy_date_b numeric numeric
## 17 haemorr_stroke_date_b numeric numeric
## 18 Hallucinogensuse numeric numeric
## 19 heart_failure_date_b numeric numeric
## 20 hosp_stroke_date_b numeric numeric
## 21 hosp_tia_date_b numeric numeric
## 22 hypertension_date_b numeric numeric
## 23 ihd_date_b numeric numeric
## 24 Intellectualdisability numeric numeric
## 25 isch_stroke_date_b numeric numeric
## 26 mood_anx_date_b numeric numeric
## 27 Mooddisorders numeric numeric
## 28 ms_date_b numeric numeric
## 29 Multiplementalillness numeric numeric
## 30 Neurocognitivedisorders numeric numeric
## 31 Neuroticrelateddisorders numeric numeric
## 32 od_case numeric numeric
## 33 Opioiduse numeric numeric
## 34 ost numeric numeric
## 35 osteo_arthritis_date_b numeric numeric
## 36 osteo_porosis_date_b numeric numeric
## 37 Osteomyelitis numeric numeric
## 38 Otherpsychoactivedruguse numeric numeric
## 39 parkinsonism_date_b numeric numeric
## 40 Personalitydisorders numeric numeric
## 41 Polysubstance numeric numeric
## 42 psychoticdisorders numeric numeric
## 43 rheumatoid_arthritis_date_b numeric numeric
## 44 Sedativeandhypnoticuse numeric numeric
## 45 Sepsis numeric numeric
## 46 Stimulantuse numeric numeric
## 47 substancerelateddisorders.x numeric numeric
## 48 Tissueinfection numeric numeric
## 49 Tobaccouse numeric numeric

overdosedata <- rbind(data2, controlsbigpool1)

table(overdosedata$od_case)

##
## 0 1
## 446710 36679

# inferencedataset1 <- as.data.frame((unclass(overdosedata)))
#
# inferencedataset1 <- data.frame(complete(mice(inferencedataset1, m=7, method = "cart", seed= 123, remove.collinear=FALSE)))
#
#
# write.csv(inferencedataset1, "inferencedataset1.csv", row.names = FALSE)

###splitting before imputation

# set.seed(2001)
#
# data <- overdosedata
#
# index= createDataPartition(y=data$od_case, p = 0.7, list = FALSE)
#
#
# train.set = data[index,]
# test.set = data[-index,]
#
# test.set$od_case = as.factor(test.set $od_case)
# train.set$od_case = as.factor(train.set$od_case)
#
# train.set = train.set %>% mutate_if(is.character, as.factor)
# test.set = test.set %>% mutate_if(is.character, as.factor)
#
# dim(train.set)
# dim(test.set)
#
# table(train.set$od_case)
# table(test.set$od_case)
#
# na_count <- sapply(train.set, function(y) sum(length(which(is.na(y)))))
#
# na_count1 <- data.frame(na_count)
#
# na_count1
#
# na_count2 <- sapply(test.set, function(y) sum(length(which(is.na(y)))))
#
# na_count3 <- data.frame(na_count2)
#
# na_count3

train.setna <- read_csv("U:/Andy's Thesis/MLoverdose in general/GeneralodML/train.setna.csv" , show_col_types = FALSE)


test.setna <- read_csv("U:/Andy's Thesis/MLoverdose in general/GeneralodML/test.setna.csv" , show_col_types = FALSE)


na_count0 <- sapply(train.setna, function(y) sum(length(which(is.na(y)))))

na_counttrain <- data.frame(na_count0)

na_counttrain

## na_count0
## ost 2282
## rheumatoid_arthritis_date_b 3612
## parkinsonism_date_b 3612
## osteo_arthritis_date_b 3612
## osteo_porosis_date_b 3612
## ms_date_b 3612
## mood_anx_date_b 3612
## isch_stroke_date_b 3612
## ihd_date_b 3612
## hypertension_date_b 3612
## hosp_tia_date_b 3612
## hosp_stroke_date_b 3612
## heart_failure_date_b 3612
## haemorr_stroke_date_b 3612
## epilepsy_date_b 3612
## diabetes_date_b 3612
## depression_date_b 3612
## copd_date_b 3612
## ckd_date_b 3612
## asthma_date_b 3612
## angina_date_b 3612
## ami_date_b 3612
## alzheimer_dementia_date_b 3612
## Tobaccouse 1202
## Tissueinfection 1202
## substancerelated.disorders 1202
## Stimulantuse 1202
## Sepsis 1202
## Sedativeandhypnoticuse 1202
## psychoticdisorders 1202
## Polysubstance 1202
## Personalitydisorders 1202
## Otherpsychoactivedruguse 1202
## Osteomyelitis 1202
## Opioiduse 1202
## Neuroticrelateddisorders 1202
## Neurocognitivedisorders 1202
## Multiplementalillness 1202
## Mooddisorders 1202
## Intellectualdisability 1202
## Hallucinogensuse 1202
## Endocarditis 1202
## earlyonsetdisorders 1202
## Developmentdisorders 1202
## Cocaineuse 1202
## Cannabinoiduse 1202
## Behaviouralpsychologicaldisturbances 1202
## Alcoholuse 1202
## od_case 0

na_count1 <- sapply(test.setna, function(y) sum(length(which(is.na(y)))))

na_counttest <- data.frame(na_count1)

na_counttest

## na_count1
## ost 1024
## rheumatoid_arthritis_date_b 1563
## parkinsonism_date_b 1563
## osteo_arthritis_date_b 1563
## osteo_porosis_date_b 1563
## ms_date_b 1563
## mood_anx_date_b 1563
## isch_stroke_date_b 1563
## ihd_date_b 1563
## hypertension_date_b 1563
## hosp_tia_date_b 1563
## hosp_stroke_date_b 1563
## heart_failure_date_b 1563
## haemorr_stroke_date_b 1563
## epilepsy_date_b 1563
## diabetes_date_b 1563
## depression_date_b 1563
## copd_date_b 1563
## ckd_date_b 1563
## asthma_date_b 1563
## angina_date_b 1563
## ami_date_b 1563
## alzheimer_dementia_date_b 1563
## Tobaccouse 533
## Tissueinfection 533
## substancerelated.disorders 533
## Stimulantuse 533
## Sepsis 533
## Sedativeandhypnoticuse 533
## psychoticdisorders 533
## Polysubstance 533
## Personalitydisorders 533
## Otherpsychoactivedruguse 533
## Osteomyelitis 533
## Opioiduse 533
## Neuroticrelateddisorders 533
## Neurocognitivedisorders 533
## Multiplementalillness 533
## Mooddisorders 533
## Intellectualdisability 533
## Hallucinogensuse 533
## Endocarditis 533
## earlyonsetdisorders 533
## Developmentdisorders 533
## Cocaineuse 533
## Cannabinoiduse 533
## Behaviouralpsychologicaldisturbances 533
## Alcoholuse 533
## od_case 0

# set2 <- train.set[sample(which(train.set$od_case != "1"), 25671), ]
#
# table(set2$od_case)
#
# set1 <- train.set %>%
# filter(od_case == 1)
#
# train.set1 <- rbind(set2, set1)
#
# table(train.set$od_case)
# table(train.set1$od_case)
# table(test.set$od_case)

# test.set1 <- test.set

train.set1 <- read_csv("U:/Andy's Thesis/MLoverdose in general/GeneralodML/train.set2.csv" , show_col_types = FALSE)


test.set1 <- read_csv("U:/Andy's Thesis/MLoverdose in general/GeneralodML/test.set2.csv" , show_col_types = FALSE)


gg_miss_var(train.set1, show_pct = TRUE)


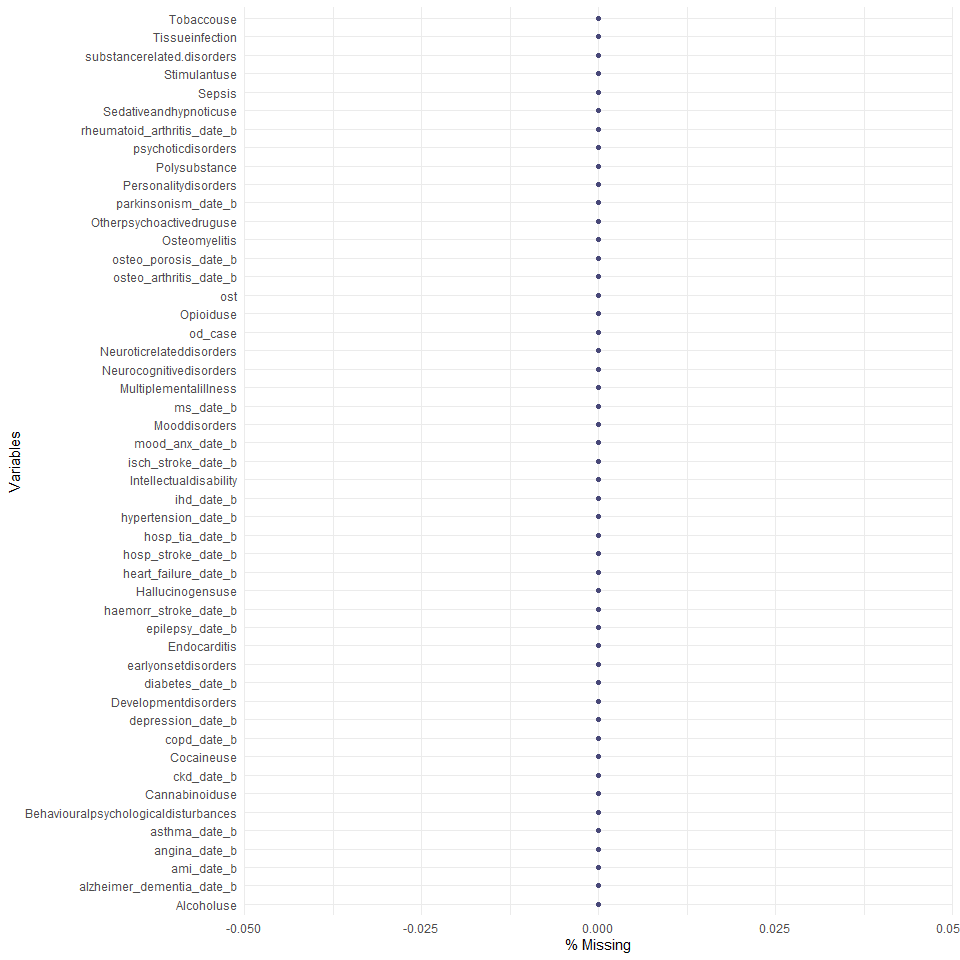


glimpse(train.set1)

## Rows: 51,342
## Columns: 49

table(train.set1$od_case)

##
## 0 1
## 25671 25671

gg_miss_var(test.set1, show_pct = TRUE)


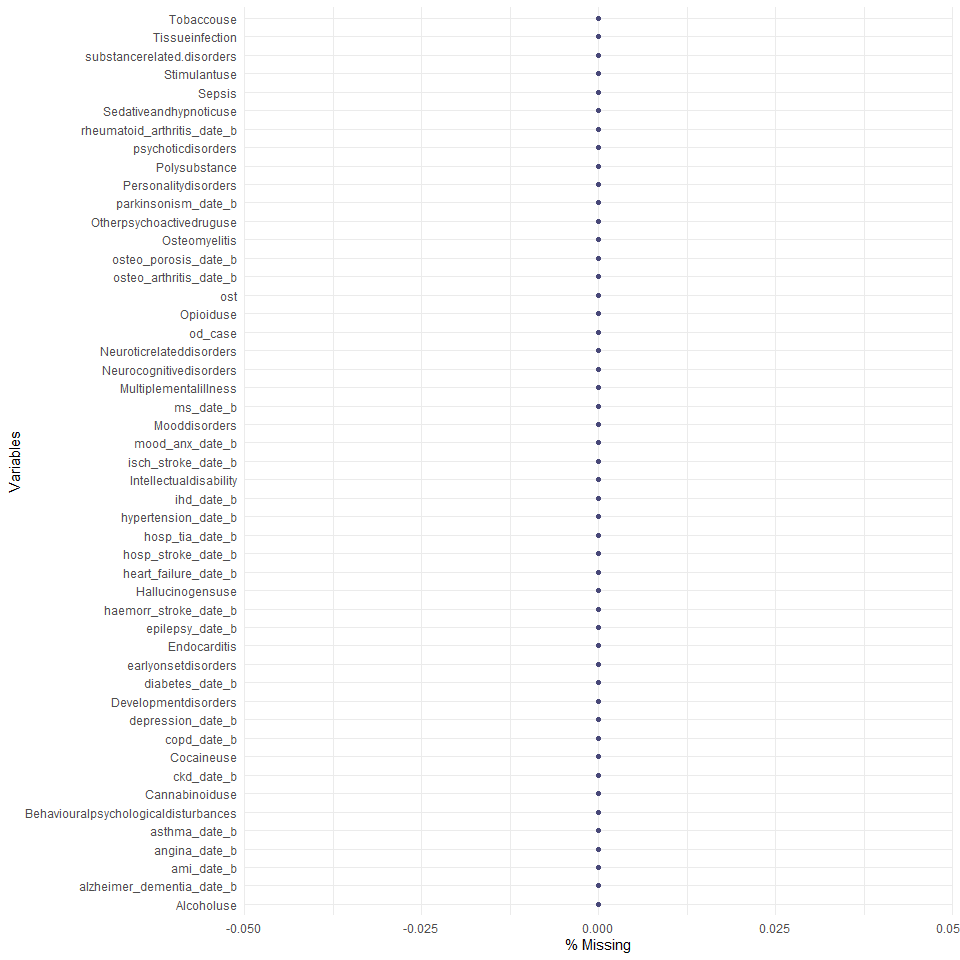


glimpse(test.set1)

## Rows: 145,016
## Columns: 49
table(test.set1$od_case)

##
## 0 1
## 134008 11008

# train.set2 <- train.set1 %>%
# rename(substancerelated.disorders = substancerelateddisorders.x)
#
# test.set2 <- test.set1 %>%
# rename(substancerelated.disorders = substancerelateddisorders.x)
#
# write.csv(train.set2, "train.setna.csv", row.names = FALSE)
# write.csv(test.set2, "test.setna.csv", row.names = FALSE)

# train.set3 <- as.data.frame((unclass(train.set2)))
#
# train.set3 <- data.frame(complete(mice(train.set3, m=7, method = "cart", seed= 123, remove.collinear=FALSE)))
#
#
# test.set3 <- as.data.frame((unclass(test.set2)))
#
# test.set3 <- data.frame(complete(mice(test.set3, m=7, method = "cart", seed= 123, remove.collinear=FALSE)))
#
#
# write.csv(train.set3, "train.set2.csv", row.names = FALSE)
# write.csv(test.set3, "test.set2.csv", row.names = FALSE)

ML modeling with Caret

library(keras)
library(tensorflow)
library(rlang)
library(tidyverse)
library(dplyr)
library(gapminder)
library(caret)
library(xgboost)
library(forcats)
library(mice)
library(vctrs)
library(naniar)
library(yardstick)
library(forcats)
library(Boruta)
library(ROSE)
library(imbalance)
library(rnn)
library(ROCR)
library(SHAPforxgboost)
library(randomForest)
library(mlbench)
library(ggplot2)
library(data.table)
library(here)
library(pROC)
library(ROCR)

###Testing the original sample

datasettrain <- read_csv("U:/Andy's Thesis/MLoverdose in general/GeneralodML/train.set2.csv" , show_col_types = FALSE)

datasettest <- read_csv("U:/Andy's Thesis/MLoverdose in general/GeneralodML/test.set2.csv" , show_col_types = FALSE)

train.set <- datasettrain
test.set <- datasettest

train.set <- train.set %>%
 mutate(od_case = recode(od_case, "0" = "No", "1" = "Yes"))

test.set <- test.set %>%
 mutate(od_case = recode(od_case, "0" = "No", "1" = "Yes"))

train.set = train.set %>% mutate_if(is.character, as.factor)
test.set = test.set %>% mutate_if(is.character, as.factor)

dim(train.set)

## [1] 51342 49

dim(test.set)

## [1] 145016 49

nrow(train.set)

## [1] 51342

table(train.set$od_case)

##
## No Yes
## 25671 25671

dim(train.set)

## [1] 51342 49

dim(test.set)

## [1] 145016 49

table(train.set$od_case)

##
## No Yes
## 25671 25671

table(test.set$od_case)

##
## No Yes
## 134008 11008

class(train.set$od_case)

## [1] "factor"

class(test.set$od_case)

## [1] "factor"

#XGBOOST

grid_default <- expand.grid(
 nrounds= 300,
 max_depth = 5,
 eta = 0.3, gamma = 0.001,
 colsample_bytree = 0.75,
 min_child_weight = 1,
 subsample = 1
)

train_control <- caret::trainControl(
 method = "none",
 summaryFunction = twoClassSummary,
 returnResamp = "none",
 classProbs = TRUE,
 savePredictions = TRUE,
 verboseIter = FALSE,
 allowParallel = TRUE
)

model = caret::train(od_case ~ .,
 data = train.set,
 trControl = train_control,
 method = "xgbTree",
 tuneGrid = grid_default,
 verbose = TRUE
 )

pred <- predict(model, test.set)
confusionMatrix(factor(pred), factor(test.set$od_case), positive = "Yes")

## Confusion Matrix and Statistics
##
## Reference
## Prediction No Yes
## No 119364 2006
## Yes 14644 9002
##
## Accuracy : 0.8852
## 95% CI : (0.8835, 0.8868)
## No Information Rate : 0.9241
## P-Value [Acc > NIR] : 1
##
## Kappa : 0.464
##
## Mcnemar's Test P-Value : <2e-16
##
## Sensitivity : 0.81777
## Specificity : 0.89072
## Pos Pred Value : 0.38070
## Neg Pred Value : 0.98347
## Prevalence : 0.07591
## Detection Rate : 0.06208
## Detection Prevalence : 0.16306
## Balanced Accuracy : 0.85425
##
## 'Positive' Class : Yes
##

prob <- predict(model, test.set, type = "prob")
results.roc <- roc(test.set$od_case, prob$Yes)
auc(results.roc)

## Area under the curve: 0.9084

plot(results.roc, print.thres = "best", print.thres.best.method = "closest.topleft")


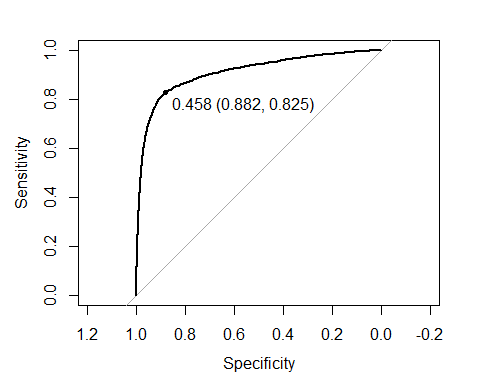


results.coords <- coords(results.roc,"best", best.method = "closest.topleft")
print(results.coords)

## threshold specificity sensitivity
## 1 0.4577166 0.8824249 0.8254906

#Random Forest

grid_default <- expand.grid(
 .mtry = 1:7,
 .splitrule="gini",
 .min.node.size=c(1)
)

train_control <- caret::trainControl(
 summaryFunction = twoClassSummary,
 returnResamp = "none",
 classProbs = TRUE,
 savePredictions = TRUE,
 verboseIter = FALSE,
 allowParallel = TRUE
)

rf2 = caret::train(od_case ~ .,
 data = train.set,
 method = "ranger",
 trControl = train_control,
 tuneGrid = grid_default,
 verbose = TRUE
 )

pred <- predict(rf2, test.set)
confusionMatrix(factor(pred), factor(test.set$od_case), positive = "Yes")

## Confusion Matrix and Statistics
##
## Reference
## Prediction No Yes
## No 120098 2047
## Yes 13910 8961
##
## Accuracy : 0.89
## 95% CI : (0.8883, 0.8916)
## No Information Rate : 0.9241
## P-Value [Acc > NIR] : 1
##
## Kappa : 0.4752
##
## Mcnemar's Test P-Value : <2e-16
##
## Sensitivity : 0.81404
## Specificity : 0.89620
## Pos Pred Value : 0.39181
## Neg Pred Value : 0.98324
## Prevalence : 0.07591
## Detection Rate : 0.06179
## Detection Prevalence : 0.15771
## Balanced Accuracy : 0.85512
##
## 'Positive' Class : Yes
##

prob <- stats::predict(rf2, newdata = test.set, type = "prob")

results.roc <- roc(test.set$od_case, prob$Yes)
auc(results.roc)

## Area under the curve: 0.9111

plot(results.roc, print.thres = "best", print.thres.best.method = "closest.topleft")


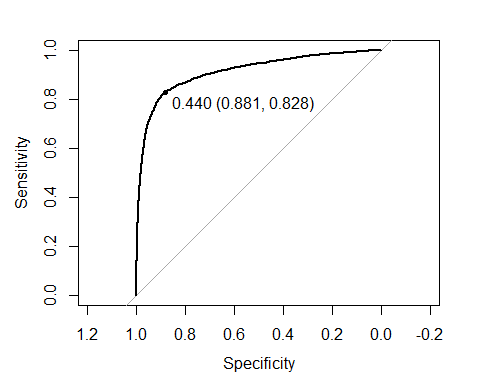


results.coords <- coords(results.roc,"best", best.method = "closest.topleft")
print(results.coords)

## threshold specificity sensitivity
## 1 0.4404112 0.8814623 0.828125

###feature selected (From Boruta)

datasettrain <- read_csv("U:/Andy's Thesis/MLoverdose in general/GeneralodML/train.set2.csv" , show_col_types = FALSE)

datasettest <- read_csv("U:/Andy's Thesis/MLoverdose in general/GeneralodML/test.set2.csv" , show_col_types = FALSE)

train.set <- datasettrain
test.set <- datasettest

train.set <- train.set %>%
 mutate(od_case = recode(od_case, "0" = "No", "1" = "Yes"))

test.set <- test.set %>%
 mutate(od_case = recode(od_case, "0" = "No", "1" = "Yes"))

train.set = train.set %>% mutate_if(is.character, as.factor)
test.set = test.set %>% mutate_if(is.character, as.factor)

dim(train.set)

## [1] 51342 49

dim(test.set)

## [1] 145016 49

nrow(train.set)

## [1] 51342

table(train.set$od_case)

##
## No Yes
## 25671 25671

dim(train.set)

## [1] 51342 49

dim(test.set)

## [1] 145016 49

table(train.set$od_case)

##
## No Yes
## 25671 25671

table(test.set$od_case)

##
## No Yes
## 134008 11008

class(train.set$od_case)

## [1] "factor"

class(test.set$od_case)

## [1] "factor"

train.set <- train.set%>%
 select(od_case, ost, rheumatoid_arthritis_date_b, parkinsonism_date_b, osteo_arthritis_date_b, osteo_porosis_date_b, mood_anx_date_b, isch_stroke_date_b, ihd_date_b, hypertension_date_b, hosp_stroke_date_b, heart_failure_date_b, haemorr_stroke_date_b, epilepsy_date_b, diabetes_date_b, depression_date_b, copd_date_b, ckd_date_b, asthma_date_b, angina_date_b, ami_date_b, alzheimer_dementia_date_b, Tobaccouse, Tissueinfection, substancerelated.disorders, Stimulantuse, Sepsis, Sedativeandhypnoticuse, psychoticdisorders, Polysubstance, Personalitydisorders, Otherpsychoactivedruguse, Osteomyelitis, Opioiduse, Neuroticrelateddisorders, Neurocognitivedisorders, Multiplementalillness, Mooddisorders, Intellectualdisability, Hallucinogensuse, Endocarditis, earlyonsetdisorders, Developmentdisorders, Cocaineuse, Cannabinoiduse, Behaviouralpsychologicaldisturbances, Alcoholuse
)

test.set <- test.set%>%
 select(od_case, ost, rheumatoid_arthritis_date_b, parkinsonism_date_b, osteo_arthritis_date_b, osteo_porosis_date_b, mood_anx_date_b, isch_stroke_date_b, ihd_date_b, hypertension_date_b, hosp_stroke_date_b, heart_failure_date_b, haemorr_stroke_date_b, epilepsy_date_b, diabetes_date_b, depression_date_b, copd_date_b, ckd_date_b, asthma_date_b, angina_date_b, ami_date_b, alzheimer_dementia_date_b, Tobaccouse, Tissueinfection, substancerelated.disorders, Stimulantuse, Sepsis, Sedativeandhypnoticuse, psychoticdisorders, Polysubstance, Personalitydisorders, Otherpsychoactivedruguse, Osteomyelitis, Opioiduse, Neuroticrelateddisorders, Neurocognitivedisorders, Multiplementalillness, Mooddisorders, Intellectualdisability, Hallucinogensuse, Endocarditis, earlyonsetdisorders, Developmentdisorders, Cocaineuse, Cannabinoiduse, Behaviouralpsychologicaldisturbances, Alcoholuse)

grid_default <- expand.grid(
 nrounds= 300,
 max_depth = 5,
 eta = 0.3, gamma = 0.001,
 colsample_bytree = 0.75,
 min_child_weight = 1,
 subsample = 1
)

train_control <- caret::trainControl(
 method = "none",
 summaryFunction = twoClassSummary,
 returnResamp = "none",
 classProbs = TRUE,
 savePredictions = TRUE,
 verboseIter = FALSE,
 allowParallel = TRUE
)

model = caret::train(od_case ~ .,
 data = train.set,
 trControl = train_control,
 method = "xgbTree",
 tuneGrid = grid_default,
 verbose = TRUE
 )

pred <- predict(model, test.set)
confusionMatrix(factor(pred), factor(test.set$od_case), positive = "Yes")

## Confusion Matrix and Statistics
##
## Reference
## Prediction No Yes
## No 119375 2015
## Yes 14633 8993
##
## Accuracy : 0.8852
## 95% CI : (0.8835, 0.8868)
## No Information Rate : 0.9241
## P-Value [Acc > NIR] : 1
##
## Kappa : 0.4638
##
## Mcnemar's Test P-Value : <2e-16
##
## Sensitivity : 0.81695
## Specificity : 0.89081
## Pos Pred Value : 0.38064
## Neg Pred Value : 0.98340
## Prevalence : 0.07591
## Detection Rate : 0.06201
## Detection Prevalence : 0.16292
## Balanced Accuracy : 0.85388
##
## 'Positive' Class : Yes
##

prob <- predict(model, test.set, type = "prob")
results.roc <- roc(test.set$od_case, prob$Yes)
auc(results.roc)

## Area under the curve: 0.9083

plot(results.roc, print.thres = "best", print.thres.best.method = "closest.topleft")


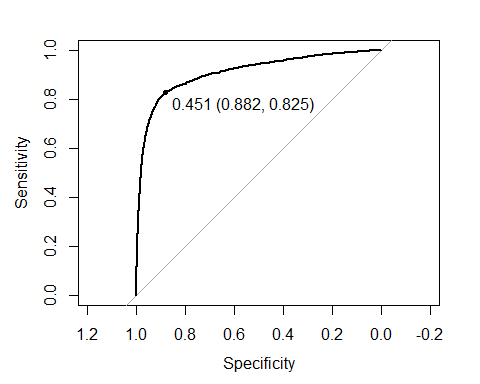


results.coords <- coords(results.roc,"best", best.method = "closest.topleft")
print(results.coords)

## threshold specificity sensitivity
## 1 0.4511632 0.881522 0.8253089

datasettrain <- read_csv("U:/Andy's Thesis/MLoverdose in general/GeneralodML/train.set2.csv" , show_col_types = FALSE)

datasettest <- read_csv("U:/Andy's Thesis/MLoverdose in general/GeneralodML/test.set2.csv" , show_col_types = FALSE)

train.set <- datasettrain
test.set <- datasettest

train.set <- train.set %>%
 mutate(od_case = recode(od_case, "0" = "No", "1" = "Yes"))

test.set <- test.set %>%
 mutate(od_case = recode(od_case, "0" = "No", "1" = "Yes"))

train.set = train.set %>% mutate_if(is.character, as.factor)
test.set = test.set %>% mutate_if(is.character, as.factor)

dim(train.set)

## [1] 51342 49

dim(test.set)

## [1] 145016 49

nrow(train.set)

## [1] 51342

table(train.set$od_case)

##
## No Yes
## 25671 25671

dim(train.set)

## [1] 51342 49

dim(test.set)

## [1] 145016 49

table(train.set$od_case)

##
## No Yes
## 25671 25671

table(test.set$od_case)

##
## No Yes
## 134008 11008

class(train.set$od_case)

## [1] "factor"

class(test.set$od_case)

## [1] "factor"

train.set <- train.set%>%
 select(od_case, ost, rheumatoid_arthritis_date_b, parkinsonism_date_b, osteo_arthritis_date_b, osteo_porosis_date_b, mood_anx_date_b, isch_stroke_date_b, ihd_date_b, hypertension_date_b, hosp_stroke_date_b, heart_failure_date_b, haemorr_stroke_date_b, epilepsy_date_b, diabetes_date_b, depression_date_b, copd_date_b, ckd_date_b, asthma_date_b, angina_date_b, ami_date_b
)

test.set <- test.set%>%
 select(od_case, ost, rheumatoid_arthritis_date_b, parkinsonism_date_b, osteo_arthritis_date_b, osteo_porosis_date_b, mood_anx_date_b, isch_stroke_date_b, ihd_date_b, hypertension_date_b, hosp_stroke_date_b, heart_failure_date_b, haemorr_stroke_date_b, epilepsy_date_b, diabetes_date_b, depression_date_b, copd_date_b, ckd_date_b, asthma_date_b, angina_date_b, ami_date_b)

grid_default <- expand.grid(
 nrounds= 300,
 max_depth = 5,
 eta = 0.3, gamma = 0.001,
 colsample_bytree = 0.75,
 min_child_weight = 1,
 subsample = 1
)

train_control <- caret::trainControl(
 method = "none",
 summaryFunction = twoClassSummary,
 returnResamp = "none",
 classProbs = TRUE,
 savePredictions = TRUE,
 verboseIter = FALSE,
 allowParallel = TRUE
)

model = caret::train(od_case ~ .,
 data = train.set,
 trControl = train_control,
 method = "xgbTree",
 tuneGrid = grid_default,
 verbose = TRUE
 )

pred <- predict(model, test.set)
confusionMatrix(factor(pred), factor(test.set$od_case), positive = "Yes")

## Confusion Matrix and Statistics
##
## Reference
## Prediction No Yes
## No 86027 3164
## Yes 47981 7844
##
## Accuracy : 0.6473
## 95% CI : (0.6448, 0.6498)
## No Information Rate : 0.9241
## P-Value [Acc > NIR] : 1
##
## Kappa : 0.1236
##
## Mcnemar's Test P-Value : <2e-16
##
## Sensitivity : 0.71257
## Specificity : 0.64195
## Pos Pred Value : 0.14051
## Neg Pred Value : 0.96453
## Prevalence : 0.07591
## Detection Rate : 0.05409
## Detection Prevalence : 0.38496
## Balanced Accuracy : 0.67726
##
## 'Positive' Class : Yes
##

prob <- predict(model, test.set, type = "prob")
results.roc <- roc(test.set$od_case, prob$Yes)
auc(results.roc)

## Area under the curve: 0.7611

plot(results.roc, print.thres = "best", print.thres.best.method = "closest.topleft")


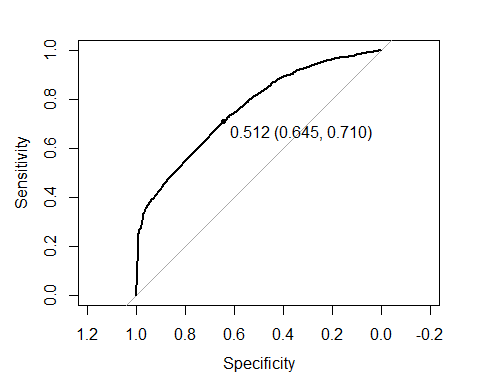


results.coords <- coords(results.roc,"best", best.method = "closest.topleft")
print(results.coords)

## threshold specificity sensitivity
## 1 0.5120248 0.6449093 0.7100291

datasettrain <- read_csv("U:/Andy's Thesis/MLoverdose in general/GeneralodML/train.set2.csv" , show_col_types = FALSE)

datasettest <- read_csv("U:/Andy's Thesis/MLoverdose in general/GeneralodML/test.set2.csv" , show_col_types = FALSE)

train.set <- datasettrain
test.set <- datasettest

train.set <- train.set %>%
 mutate(od_case = recode(od_case, "0" = "No", "1" = "Yes"))

test.set <- test.set %>%
 mutate(od_case = recode(od_case, "0" = "No", "1" = "Yes"))

train.set = train.set %>% mutate_if(is.character, as.factor)
test.set = test.set %>% mutate_if(is.character, as.factor)

dim(train.set)

## [1] 51342 49

dim(test.set)

## [1] 145016 49

nrow(train.set)

## [1] 51342

table(train.set$od_case)

##
## No Yes
## 25671 25671

dim(train.set)

## [1] 51342 49

dim(test.set)

## [1] 145016 49

table(train.set$od_case)

##
## No Yes
## 25671 25671

table(test.set$od_case)

##
## No Yes
## 134008 11008

class(train.set$od_case)

## [1] "factor"

class(test.set$od_case)

## [1] "factor"

train.set <- train.set%>%
 select(od_case, ost, mood_anx_date_b, substancerelated.disorders, Stimulantuse, psychoticdisorders, Polysubstance, Personalitydisorders, Opioiduse, Multiplementalillness, Mooddisorders, Intellectualdisability, Hallucinogensuse, earlyonsetdisorders, Developmentdisorders, Cocaineuse, Alcoholuse
)

test.set <- test.set%>%
 select(od_case, ost, mood_anx_date_b, substancerelated.disorders, Stimulantuse, psychoticdisorders, Polysubstance, Personalitydisorders, Opioiduse, Multiplementalillness, Mooddisorders, Intellectualdisability, Hallucinogensuse, earlyonsetdisorders, Developmentdisorders, Cocaineuse, Alcoholuse)

grid_default <- expand.grid(
 nrounds= 300,
 max_depth = 5,
 eta = 0.3, gamma = 0.001,
 colsample_bytree = 0.75,
 min_child_weight = 1,
 subsample = 1
)

train_control <- caret::trainControl(
 method = "none",
 summaryFunction = twoClassSummary,
 returnResamp = "none",
 classProbs = TRUE,
 savePredictions = TRUE,
 verboseIter = FALSE,
 allowParallel = TRUE
)

model = caret::train(od_case ~ .,
 data = train.set,
 trControl = train_control,
 method = "xgbTree",
 tuneGrid = grid_default,
 verbose = TRUE
 )

pred <- predict(model, test.set)
confusionMatrix(factor(pred), factor(test.set$od_case), positive = "Yes")

## Confusion Matrix and Statistics
##
## Reference
## Prediction No Yes
## No 115947 1815
## Yes 18061 9193
##
## Accuracy : 0.8629
## 95% CI : (0.8612, 0.8647)
## No Information Rate : 0.9241
## P-Value [Acc > NIR] : 1
##
## Kappa : 0.4175
##
## Mcnemar's Test P-Value : <2e-16
##
## Sensitivity : 0.83512
## Specificity : 0.86522
## Pos Pred Value : 0.33731
## Neg Pred Value : 0.98459
## Prevalence : 0.07591
## Detection Rate : 0.06339
## Detection Prevalence : 0.18794
## Balanced Accuracy : 0.85017
##
## 'Positive' Class : Yes
##

prob <- predict(model, test.set, type = "prob")
results.roc <- roc(test.set$od_case, prob$Yes)
auc(results.roc)

## Area under the curve: 0.8922

plot(results.roc, print.thres = "best", print.thres.best.method = "closest.topleft")


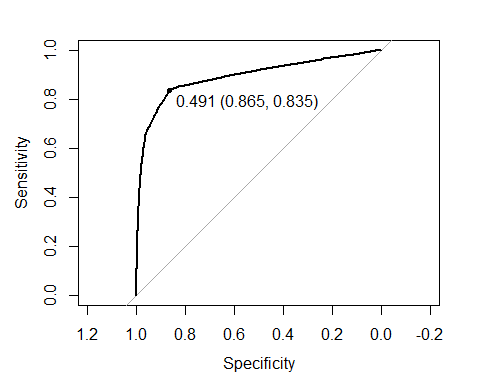


results.coords <- coords(results.roc,"best", best.method = "closest.topleft")
print(results.coords)

## threshold specificity sensitivity
## 1 0.4906703 0.8651125 0.8354833

Validating all the models

datasettrain <- read_csv("U:/Andy's Thesis/MLoverdose in general/GeneralodML/train.set2.csv" , show_col_types = FALSE)

datasettest <- read_csv("U:/Andy's Thesis/MLoverdose in general/GeneralodML/test.set2.csv" , show_col_types = FALSE)

train.set <- datasettrain
test.set <- datasettest

train.set <- train.set %>%
 mutate(od_case = recode(od_case, "0" = "No", "1" = "Yes"))

test.set <- test.set %>%
 mutate(od_case = recode(od_case, "0" = "No", "1" = "Yes"))

train.set = train.set %>% mutate_if(is.character, as.factor)
test.set = test.set %>% mutate_if(is.character, as.factor)

dim(train.set)

## [1] 51342 49

dim(test.set)

## [1] 145016 49

nrow(train.set)

## [1] 51342

table(train.set$od_case)

##
## No Yes
## 25671 25671

dim(train.set)

## [1] 51342 49

dim(test.set)

## [1] 145016 49

table(train.set$od_case)

##
## No Yes
## 25671 25671

table(test.set$od_case)

##
## No Yes
## 134008 11008

class(train.set$od_case)

## [1] "factor"

class(test.set$od_case)

## [1] "factor"

#Xgboost

grid_default <- expand.grid(
 nrounds= 300,
 max_depth = 5,
 eta = 0.3, gamma = 0.001,
 colsample_bytree = 0.75,
 min_child_weight = 1,
 subsample = 1
)

train_control <- caret::trainControl(
 method = "cv",
 number = 10,
 search = "grid",
 summaryFunction = twoClassSummary,
 returnResamp = "none",
 classProbs = TRUE,
 savePredictions = TRUE,
 verboseIter = FALSE,
 allowParallel = TRUE
)

class(train.set$od_case)

## [1] "factor"

XGBoostmodel = caret::train(od_case ~ .,
 data = train.set,
 trControl = train_control,
 method = "xgbTree",
 tuneGrid = grid_default,
 verbose = TRUE
 )

confusionMatrix(XGBoostmodel)

## Cross-Validated (10 fold) Confusion Matrix
##
## (entries are percentual average cell counts across resamples)
##
## Reference
## Prediction No Yes
## No 44.6 8.9
## Yes 5.4 41.1
##
## Accuracy (average) : 0.8569

confusionMatrix(XGBoostmodel$pred$pred, XGBoostmodel$pred$obs)

## Confusion Matrix and Statistics
##
## Reference
## Prediction No Yes
## No 22897 4572
## Yes 2774 21099
##
## Accuracy : 0.8569
## 95% CI : (0.8539, 0.8599)
## No Information Rate : 0.5
## P-Value [Acc > NIR] : < 2.2e-16
##
## Kappa : 0.7138
##
## Mcnemar's Test P-Value : < 2.2e-16
##
## Sensitivity : 0.8919
## Specificity : 0.8219
## Pos Pred Value : 0.8336
## Neg Pred Value : 0.8838
## Prevalence : 0.5000
## Detection Rate : 0.4460
## Detection Prevalence : 0.5350
## Balanced Accuracy : 0.8569
##
## 'Positive' Class : No
##

#Random Forest

grid_default <- expand.grid(
 .mtry = c(1:7),
 .splitrule="gini",
 .min.node.size=c(1)
)

train_control <- caret::trainControl(
 method = "cv",
 number = 10,
 search = "grid",
 summaryFunction = twoClassSummary,
 returnResamp = "none",
 classProbs = TRUE,
 savePredictions = TRUE,
 verboseIter = FALSE,
 allowParallel = TRUE
)

rf1 = caret::train(od_case ~ .,
 data = train.set,
 trControl = train_control,
 method = "ranger",
 tuneGrid = grid_default,
 verbose = TRUE
 )

print(rf1)

## Random Forest
##
## 51342 samples
## 48 predictor
## 2 classes: 'No', 'Yes'
##
## No pre-processing
## Resampling: Cross-Validated (10 fold)
## Summary of sample sizes: 46208, 46206, 46208, 46208, 46208, 46208, ...
## Resampling results across tuning parameters:
##
## mtry ROC Sens Spec
## 1 0.9038600 0.9215068 0.7469122
## 2 0.9154990 0.9067039 0.8067470
## 3 0.9175635 0.8975107 0.8213938
## 4 0.9177619 0.8942774 0.8249776
## 5 0.9171787 0.8940827 0.8247439
## 6 0.9165390 0.8936931 0.8240428
## 7 0.9158401 0.8941606 0.8234974
##
## Tuning parameter 'splitrule' was held constant at a value of gini
##
## Tuning parameter 'min.node.size' was held constant at a value of 1
## ROC was used to select the optimal model using the largest value.
## The final values used for the model were mtry = 4, splitrule = gini
## and min.node.size = 1.

confusionMatrix(rf1)

## Cross-Validated (10 fold) Confusion Matrix
##
## (entries are percentual average cell counts across resamples)
##
## Reference
## Prediction No Yes
## No 44.7 8.8
## Yes 5.3 41.2
##
## Accuracy (average) : 0.8596

confusionMatrix(rf1$pred$pred, rf1$pred$obs)

## Confusion Matrix and Statistics
##
## Reference
## Prediction No Yes
## No 161777 34083
## Yes 17920 145614
##
## Accuracy : 0.8553
## 95% CI : (0.8541, 0.8565)
## No Information Rate : 0.5
## P-Value [Acc > NIR] : < 2.2e-16
##
## Kappa : 0.7106
##
## Mcnemar's Test P-Value : < 2.2e-16
##
## Sensitivity : 0.9003
## Specificity : 0.8103
## Pos Pred Value : 0.8260
## Neg Pred Value : 0.8904
## Prevalence : 0.5000
## Detection Rate : 0.4501
## Detection Prevalence : 0.5450
## Balanced Accuracy : 0.8553
##
## 'Positive' Class : No
##

#Adabag

grid_default <- expand.grid(
 mfinal = 300,
 maxdepth = 5
)


train_control <- caret::trainControl(
 method = "cv",
 number = 10,
 search = "grid",
 summaryFunction = twoClassSummary,
 returnResamp = "none",
 classProbs = TRUE,
 savePredictions = TRUE,
 verboseIter = FALSE,
 allowParallel = TRUE
)

ada = caret::train(od_case ~ .,
 data = train.set,
 trControl = train_control,
 method = "AdaBag",
 tuneGrid = grid_default,
 verbose = TRUE
 )

print(ada)

## Bagged AdaBoost
##
## 51342 samples
## 48 predictor
## 2 classes: 'No', 'Yes'
##
## No pre-processing
## Resampling: Cross-Validated (10 fold)
## Summary of sample sizes: 46207, 46208, 46208, 46208, 46208, 46208, ...
## Resampling results:
##
## ROC Sens Spec
## 0.8728535 0.8913562 0.820225
##
## Tuning parameter 'mfinal' was held constant at a value of 300
## Tuning
## parameter 'maxdepth' was held constant at a value of 5

confusionMatrix(ada)

## Cross-Validated (10 fold) Confusion Matrix
##
## (entries are percentual average cell counts across resamples)
##
## Reference
## Prediction No Yes
## No 44.6 9.0
## Yes 5.4 41.0
##
## Accuracy (average) : 0.8558

confusionMatrix(ada$pred$pred, ada$pred$obs)

## Confusion Matrix and Statistics
##
## Reference
## Prediction No Yes
## No 22882 4615
## Yes 2789 21056
##
## Accuracy : 0.8558
## 95% CI : (0.8527, 0.8588)
## No Information Rate : 0.5
## P-Value [Acc > NIR] : < 2.2e-16
##
## Kappa : 0.7116
##
## Mcnemar's Test P-Value : < 2.2e-16
##
## Sensitivity : 0.8914
## Specificity : 0.8202
## Pos Pred Value : 0.8322
## Neg Pred Value : 0.8830
## Prevalence : 0.5000
## Detection Rate : 0.4470
## Detection Prevalence : 0.5356
## Balanced Accuracy : 0.8558
##
## 'Positive' Class : No
##

#SVM

train_control <- caret::trainControl(
 method = "cv",
 number = 10,
 search = "grid",
 summaryFunction = twoClassSummary,
 returnResamp = "none",
 classProbs = TRUE,
 savePredictions = TRUE,
 verboseIter = FALSE,
 allowParallel = TRUE
)

svmmodel = caret::train(od_case ~ .,
 data = train.set,
 trControl = train_control,
 method = "svmLinear",
 verbose = TRUE,
 tuneLength = 10
 )

print(svmmodel)

## Support Vector Machines with Linear Kernel
##
## 51342 samples
## 48 predictor
## 2 classes: 'No', 'Yes'
##
## No pre-processing
## Resampling: Cross-Validated (10 fold)
## Summary of sample sizes: 46208, 46208, 46208, 46208, 46208, 46207, ...
## Resampling results:
##
## ROC Sens Spec
## 0.8934179 0.8713335 0.8279382
##
## Tuning parameter 'C' was held constant at a value of 1

confusionMatrix(svmmodel)

## Cross-Validated (10 fold) Confusion Matrix
##
## (entries are percentual average cell counts across resamples)
##
## Reference
## Prediction No Yes
## No 43.6 8.6
## Yes 6.4 41.4
##
## Accuracy (average) : 0.8496

confusionMatrix(svmmodel$pred$pred, svmmodel$pred$obs)

## Confusion Matrix and Statistics
##
## Reference
## Prediction No Yes
## No 22368 4417
## Yes 3303 21254
##
## Accuracy : 0.8496
## 95% CI : (0.8465, 0.8527)
## No Information Rate : 0.5
## P-Value [Acc > NIR] : < 2.2e-16
##
## Kappa : 0.6993
##
## Mcnemar's Test P-Value : < 2.2e-16
##
## Sensitivity : 0.8713
## Specificity : 0.8279
## Pos Pred Value : 0.8351
## Neg Pred Value : 0.8655
## Prevalence : 0.5000
## Detection Rate : 0.4357
## Detection Prevalence : 0.5217
## Balanced Accuracy : 0.8496
##
## 'Positive' Class : No
##

#Logistic Regression

grid_default <- expand.grid(parameter=c(0.001, 0.01, 0.1, 1, 10, 100, 1000))


train_control <- caret::trainControl(
 method = "cv",
 number = 10,
 search = "grid",
 summaryFunction = twoClassSummary,
 returnResamp = "none",
 classProbs = TRUE,
 savePredictions = TRUE,
 verboseIter = FALSE,
 allowParallel = TRUE
)

LogitModel <- caret::train(od_case ~ .,
 data = train.set,
 method = "glm",
 family = "binomial",
 trControl = train_control,
 tuneGrid = grid_default
 )


print(LogitModel)

## Generalized Linear Model
##
## 51342 samples
## 48 predictor
## 2 classes: 'No', 'Yes'
##
## No pre-processing
## Resampling: Cross-Validated (10 fold)
## Summary of sample sizes: 46208, 46208, 46208, 46208, 46208, 46208, ...
## Resampling results across tuning parameters:
##
## ROC Sens Spec parameter
## 0.9135732 0.8901485 0.821822 0.001
## 0.9135732 0.8901485 0.821822 0.001
## 0.9135732 0.8901485 0.821822 0.001
## 0.9135732 0.8901485 0.821822 0.001
## 0.9135732 0.8901485 0.821822 0.001
## 0.9135732 0.8901485 0.821822 0.001
## 0.9135732 0.8901485 0.821822 0.001
##
## ROC was used to select the optimal model using the largest value.
## The final value used for the model was parameter = 0.001.

confusionMatrix(LogitModel)

## Cross-Validated (10 fold) Confusion Matrix
##
## (entries are percentual average cell counts across resamples)
##
## Reference
## Prediction No Yes
## No 44.5 8.9
## Yes 5.5 41.1
##
## Accuracy (average) : 0.856

confusionMatrix(LogitModel$pred$pred, LogitModel$pred$obs)

## Confusion Matrix and Statistics
##
## Reference
## Prediction No Yes
## No 159957 32018
## Yes 19740 147679
##
## Accuracy : 0.856
## 95% CI : (0.8548, 0.8571)
## No Information Rate : 0.5
## P-Value [Acc > NIR] : < 2.2e-16
##
## Kappa : 0.712
##
## Mcnemar's Test P-Value : < 2.2e-16
##
## Sensitivity : 0.8901
## Specificity : 0.8218
## Pos Pred Value : 0.8332
## Neg Pred Value : 0.8821
## Prevalence : 0.5000
## Detection Rate : 0.4451
## Detection Prevalence : 0.5342
## Balanced Accuracy : 0.8560
##
## 'Positive' Class : No
##

#GBM

train_control <- caret::trainControl(
 method = "cv",
 number = 10,
 search = "grid",
 summaryFunction = twoClassSummary,
 returnResamp = "none",
 classProbs = TRUE,
 savePredictions = TRUE,
 verboseIter = FALSE,
 allowParallel = TRUE
)

gbm <- caret::train(od_case ~ .,
 data = train.set,
 method = "gbm",
 trControl = train_control,
 )

print(gbm)

## Stochastic Gradient Boosting
##
## 51342 samples
## 48 predictor
## 2 classes: 'No', 'Yes'
##
## No pre-processing
## Resampling: Cross-Validated (10 fold)
## Summary of sample sizes: 46208, 46208, 46208, 46207, 46207, 46208, ...
## Resampling results across tuning parameters:
##
## interaction.depth n.trees ROC Sens Spec
## 1 50 0.9024160 0.8789684 0.8137591
## 1 100 0.9081720 0.8740601 0.8307042
## 1 150 0.9120258 0.8784618 0.8294577
## 2 50 0.9083011 0.8719565 0.8332362
## 2 100 0.9137730 0.8801758 0.8330026
## 2 150 0.9152219 0.8858243 0.8308991
## 3 50 0.9123934 0.8757351 0.8363916
## 3 100 0.9155810 0.8840324 0.8333922
## 3 150 0.9167294 0.8887849 0.8303927
##
## Tuning parameter 'shrinkage' was held constant at a value of 0.1
##
## Tuning parameter 'n.minobsinnode' was held constant at a value of 10
## ROC was used to select the optimal model using the largest value.
## The final values used for the model were n.trees = 150, interaction.depth =
## 3, shrinkage = 0.1 and n.minobsinnode = 10.

confusionMatrix(gbm)

## Cross-Validated (10 fold) Confusion Matrix
##
## (entries are percentual average cell counts across resamples)
##
## Reference
## Prediction No Yes
## No 44.4 8.5
## Yes 5.6 41.5
##
## Accuracy (average) : 0.8596

confusionMatrix(gbm$pred$pred, gbm$pred$obs)

## Confusion Matrix and Statistics
##
## Reference
## Prediction No Yes
## No 203263 39245
## Yes 27776 191794
##
## Accuracy : 0.855
## 95% CI : (0.8539, 0.856)
## No Information Rate : 0.5
## P-Value [Acc > NIR] : < 2.2e-16
##
## Kappa : 0.7099
##
## Mcnemar's Test P-Value : < 2.2e-16
##
## Sensitivity : 0.8798
## Specificity : 0.8301
## Pos Pred Value : 0.8382
## Neg Pred Value : 0.8735
## Prevalence : 0.5000
## Detection Rate : 0.4399
## Detection Prevalence : 0.5248
## Balanced Accuracy : 0.8550
##
## 'Positive' Class : No
##

#Naive Bayes

train_control <- caret::trainControl(
 method = "cv",
 number = 10,
 search = "grid",
 summaryFunction = twoClassSummary,
 returnResamp = "none",
 classProbs = TRUE,
 savePredictions = TRUE,
 verboseIter = FALSE,
 allowParallel = TRUE
)

nBmodel <- caret::train(od_case ~ .,
 data = train.set,
 method = "nb",
 trControl = train_control
 )

confusionMatrix(nBmodel)

## Cross-Validated (10 fold) Confusion Matrix
##
## (entries are percentual average cell counts across resamples)
##
## Reference
## Prediction No Yes
## No 49.8 39.9
## Yes 0.2 10.1
##
## Accuracy (average) : 0.5995

confusionMatrix(nBmodel$pred$pred, nBmodel$pred$obs)

## Confusion Matrix and Statistics
##
## Reference
## Prediction No Yes
## No 49034 27812
## Yes 2308 23530
##
## Accuracy : 0.7067
## 95% CI : (0.7039, 0.7095)
## No Information Rate : 0.5
## P-Value [Acc > NIR] : < 2.2e-16
##
## Kappa : 0.4133
##
## Mcnemar's Test P-Value : < 2.2e-16
##
## Sensitivity : 0.9550
## Specificity : 0.4583
## Pos Pred Value : 0.6381
## Neg Pred Value : 0.9107
## Prevalence : 0.5000
## Detection Rate : 0.4775
## Detection Prevalence : 0.7484
## Balanced Accuracy : 0.7067
##
## 'Positive' Class : No
##

#KNN

grid_default <- expand.grid(k = 1)

train_control <- caret::trainControl(
 method = "cv",
 number = 10,
 search = "grid",
 summaryFunction = twoClassSummary,
 returnResamp = "none",
 classProbs = TRUE,
 savePredictions = TRUE,
 verboseIter = FALSE,
 allowParallel = TRUE
)

knnmodel <- caret::train(od_case ~ .,
 data = train.set,
 method = "knn",
 tuneGrid = grid_default,
 trControl = train_control)

confusionMatrix(knnmodel)

## Cross-Validated (10 fold) Confusion Matrix
##
## (entries are percentual average cell counts across resamples)
##
## Reference
## Prediction No Yes
## No 43.8 10.5
## Yes 6.2 39.5
##
## Accuracy (average) : 0.8328

confusionMatrix(knnmodel$pred$pred, knnmodel$pred$obs)

## Confusion Matrix and Statistics
##
## Reference
## Prediction No Yes
## No 22474 5387
## Yes 3197 20284
##
## Accuracy : 0.8328
## 95% CI : (0.8296, 0.836)
## No Information Rate : 0.5
## P-Value [Acc > NIR] : < 2.2e-16
##
## Kappa : 0.6656
##
## Mcnemar's Test P-Value : < 2.2e-16
##
## Sensitivity : 0.8755
## Specificity : 0.7902
## Pos Pred Value : 0.8066
## Neg Pred Value : 0.8638
## Prevalence : 0.5000
## Detection Rate : 0.4377
## Detection Prevalence : 0.5427
## Balanced Accuracy : 0.8328
##
## 'Positive' Class : No
##

#Testing for the best performing model

#Xgboost
predt <- predict(XGBoostmodel, test.set)
confusionMatrix(predt, test.set$od_case, positive = "Yes")

## Confusion Matrix and Statistics
##
## Reference
## Prediction No Yes
## No 119372 2016
## Yes 14636 8992
##
## Accuracy : 0.8852
## 95% CI : (0.8835, 0.8868)
## No Information Rate : 0.9241
## P-Value [Acc > NIR] : 1
##
## Kappa : 0.4637
##
## Mcnemar's Test P-Value : <2e-16
##
## Sensitivity : 0.81686
## Specificity : 0.89078
## Pos Pred Value : 0.38057
## Neg Pred Value : 0.98339
## Prevalence : 0.07591
## Detection Rate : 0.06201
## Detection Prevalence : 0.16293
## Balanced Accuracy : 0.85382
##
## 'Positive' Class : Yes
##

prob <- predict(XGBoostmodel, test.set, type = "prob")
results.roc <- roc(test.set$od_case, prob$Yes)
auc(results.roc)

## Area under the curve: 0.9084

plot(results.roc, print.thres = "best", print.thres.best.method = "closest.topleft")


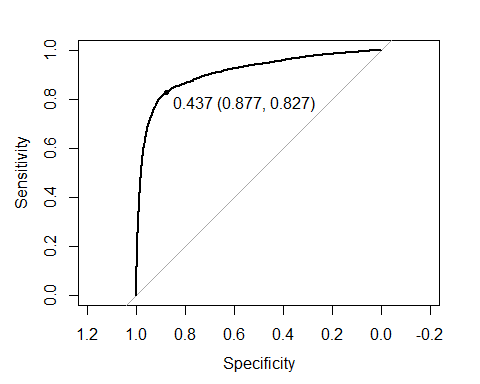


results.coords <- coords(results.roc,"best", best.method = "closest.topleft")
print(results.coords)

## threshold specificity sensitivity
## 1 0.4371451 0.8774402 0.8272166

#RF
predrf <- predict(rf1, test.set)
confusionMatrix(factor(predrf), factor(test.set$od_case), positive = "Yes")

## Confusion Matrix and Statistics
##
## Reference
## Prediction No Yes
## No 119745 2027
## Yes 14263 8981
##
## Accuracy : 0.8877
## 95% CI : (0.886, 0.8893)
## No Information Rate : 0.9241
## P-Value [Acc > NIR] : 1
##
## Kappa : 0.4698
##
## Mcnemar's Test P-Value : <2e-16
##
## Sensitivity : 0.81586
## Specificity : 0.89357
## Pos Pred Value : 0.38638
## Neg Pred Value : 0.98335
## Prevalence : 0.07591
## Detection Rate : 0.06193
## Detection Prevalence : 0.16029
## Balanced Accuracy : 0.85471
##
## 'Positive' Class : Yes
##

prob <- predict(rf1, test.set, type = "prob")
results.roc1 <- roc(test.set$od_case, prob$Yes)
auc(results.roc1)

## Area under the curve: 0.9112

plot(results.roc1, print.thres = "best", print.thres.best.method = "closest.topleft")


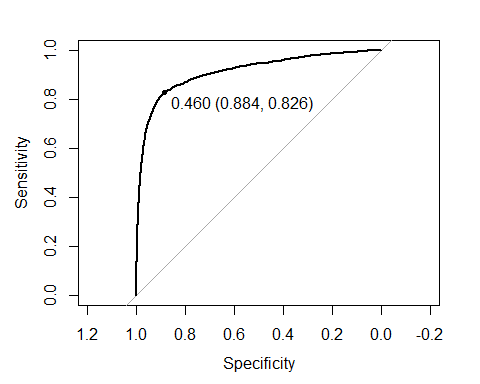


#AdaBag
adat <- predict(ada, test.set)
confusionMatrix(adat, test.set$od_case, positive = "Yes")

## Confusion Matrix and Statistics
##
## Reference
## Prediction No Yes
## No 120482 2154
## Yes 13526 8854
##
## Accuracy : 0.8919
## 95% CI : (0.8903, 0.8935)
## No Information Rate : 0.9241
## P-Value [Acc > NIR] : 1
##
## Kappa : 0.4772
##
## Mcnemar's Test P-Value : <2e-16
##
## Sensitivity : 0.80432
## Specificity : 0.89907
## Pos Pred Value : 0.39562
## Neg Pred Value : 0.98244
## Prevalence : 0.07591
## Detection Rate : 0.06106
## Detection Prevalence : 0.15433
## Balanced Accuracy : 0.85169
##
## 'Positive' Class : Yes
##

prob <- predict(ada, test.set, type = "prob")
results.roc2 <- roc(test.set$od_case, prob$Yes)
auc(results.roc2)

## Area under the curve: 0.8686

plot(results.roc2, print.thres = "best", print.thres.best.method = "closest.topleft")


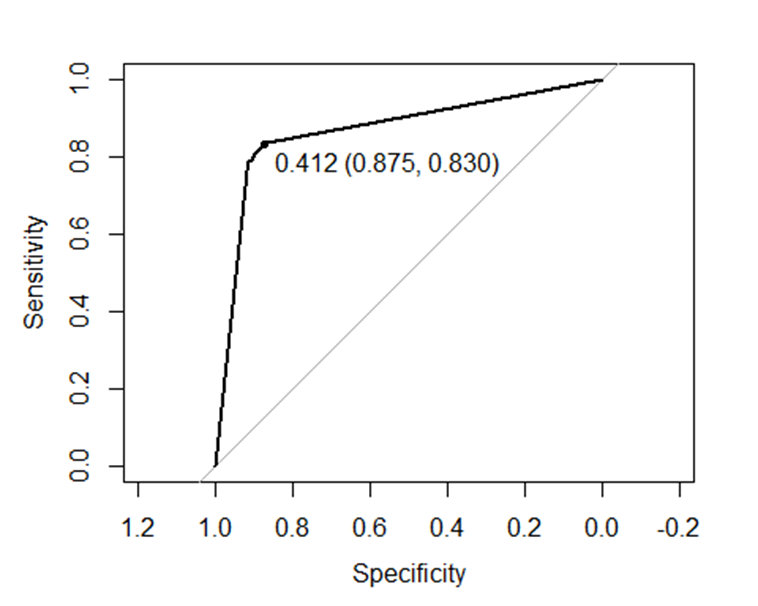


#Support Vector Machine
svmpt <- predict(svmmodel, test.set)
confusionMatrix(svmpt, test.set$od_case, positive = "Yes")

## Confusion Matrix and Statistics
##
## Reference
## Prediction No Yes
## No 116205 1992
## Yes 17803 9016
##
## Accuracy : 0.8635
## 95% CI : (0.8617, 0.8653)
## No Information Rate : 0.9241
## P-Value [Acc > NIR] : 1
##
## Kappa : 0.4136
##
## Mcnemar's Test P-Value : <2e-16
##
## Sensitivity : 0.81904
## Specificity : 0.86715
## Pos Pred Value : 0.33618
## Neg Pred Value : 0.98315
## Prevalence : 0.07591
## Detection Rate : 0.06217
## Detection Prevalence : 0.18494
## Balanced Accuracy : 0.84310
##
## 'Positive' Class : Yes
##

prob <- predict(svmmodel, test.set, type = "prob")
results.roc3 <- roc(test.set$od_case, prob$Yes)
auc(results.roc3)

## Area under the curve: 0.8805

plot(results.roc3, print.thres = "best", print.thres.best.method = "closest.topleft")


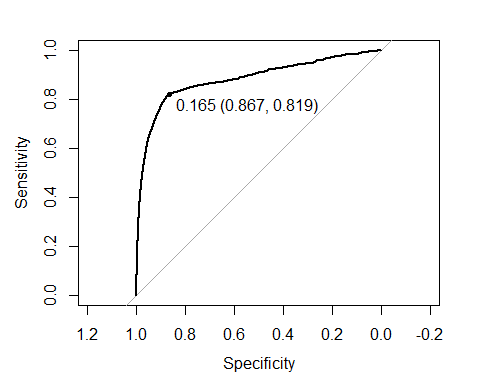


#Logistic Regression
LogitModelt <- predict(LogitModel, newdata = test.set)
confusionMatrix(LogitModelt, test.set$od_case, positive = "Yes")

## Confusion Matrix and Statistics
##
## Reference
## Prediction No Yes
## No 118866 2037
## Yes 15142 8971
##
## Accuracy : 0.8815
## 95% CI : (0.8799, 0.8832)
## No Information Rate : 0.9241
## P-Value [Acc > NIR] : 1
##
## Kappa : 0.4539
##
## Mcnemar's Test P-Value : <2e-16
##
## Sensitivity : 0.81495
## Specificity : 0.88701
## Pos Pred Value : 0.37204
## Neg Pred Value : 0.98315
## Prevalence : 0.07591
## Detection Rate : 0.06186
## Detection Prevalence : 0.16628
## Balanced Accuracy : 0.85098
##
## 'Positive' Class : Yes
##

prob <- predict(LogitModel, test.set, type = "prob")
results.roc4 <- roc(test.set$od_case, prob$Yes)
auc(results.roc4)

## Area under the curve: 0.9067

plot(results.roc4, print.thres = "best", print.thres.best.method = "closest.topleft")


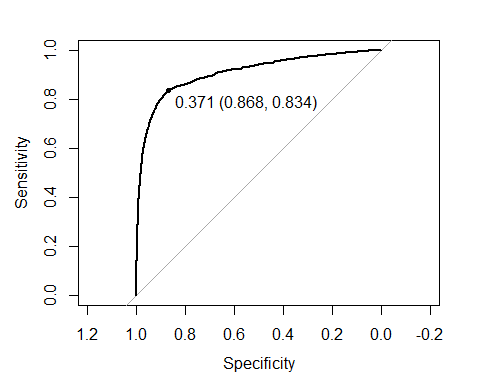


#GBM
gbmt <- predict(gbm, newdata = test.set)
confusionMatrix(gbmt, test.set$od_case, positive = "Yes")

## Confusion Matrix and Statistics
##
## Reference
## Prediction No Yes
## No 118853 1946
## Yes 15155 9062
##
## Accuracy : 0.8821
## 95% CI : (0.8804, 0.8837)
## No Information Rate : 0.9241
## P-Value [Acc > NIR] : 1
##
## Kappa : 0.4579
##
## Mcnemar's Test P-Value : <2e-16
##
## Sensitivity : 0.82322
## Specificity : 0.88691
## Pos Pred Value : 0.37420
## Neg Pred Value : 0.98389
## Prevalence : 0.07591
## Detection Rate : 0.06249
## Detection Prevalence : 0.16700
## Balanced Accuracy : 0.85506
##
## 'Positive' Class : Yes
##

prob <- predict(gbm, test.set, type = "prob")
results.roc5 <- roc(test.set$od_case, prob$Yes)
auc(results.roc5)

## Area under the curve: 0.91

plot(results.roc5, print.thres = "best", print.thres.best.method = "closest.topleft")


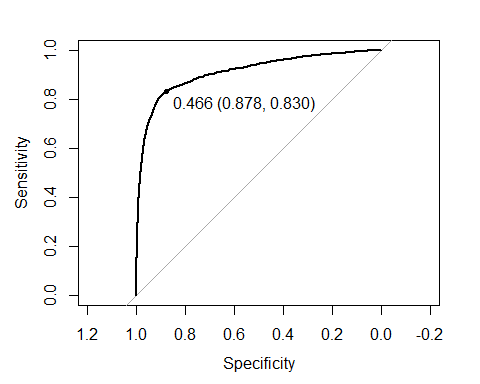


#Naive Bayes
Nbpt <- predict(nBmodel, newdata = test.set)
confusionMatrix(Nbpt , reference = test.set$od_case, positive = "Yes")

## Confusion Matrix and Statistics
##
## Reference
## Prediction No Yes
## No 133523 8786
## Yes 485 2222
##
## Accuracy : 0.9361
## 95% CI : (0.9348, 0.9373)
## No Information Rate : 0.9241
## P-Value [Acc > NIR] : < 2.2e-16
##
## Kappa : 0.3031
##
## Mcnemar's Test P-Value : < 2.2e-16
##
## Sensitivity : 0.20185
## Specificity : 0.99638
## Pos Pred Value : 0.82083
## Neg Pred Value : 0.93826
## Prevalence : 0.07591
## Detection Rate : 0.01532
## Detection Prevalence : 0.01867
## Balanced Accuracy : 0.59912
##
## 'Positive' Class : Yes
##

prob <- predict(nBmodel, test.set, type = "prob")
results.roc6 <- roc(test.set$od_case, prob$Yes)
auc(results.roc6)

## Area under the curve: 0.8843

plot(results.roc6, print.thres = "best", print.thres.best.method = "closest.topleft")


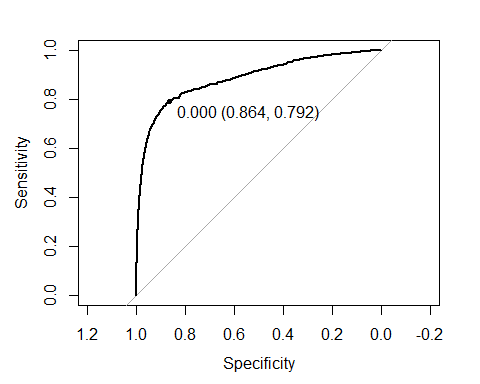


#KNN
Knnpt <- predict(knnmodel, newdata = test.set)
confusionMatrix(Knnpt, test.set$od_case, positive = "Yes")

## Confusion Matrix and Statistics
##
## Reference
## Prediction No Yes
## No 117573 2384
## Yes 16435 8624
##
## Accuracy : 0.8702
## 95% CI : (0.8685, 0.872)
## No Information Rate : 0.9241
## P-Value [Acc > NIR] : 1
##
## Kappa : 0.4167
##
## Mcnemar's Test P-Value : <2e-16
##
## Sensitivity : 0.78343
## Specificity : 0.87736
## Pos Pred Value : 0.34415
## Neg Pred Value : 0.98013
## Prevalence : 0.07591
## Detection Rate : 0.05947
## Detection Prevalence : 0.17280
## Balanced Accuracy : 0.83039
##
## 'Positive' Class : Yes
##

prob <- predict(knnmodel, test.set, type = "prob")
results.roc7 <- roc(test.set$od_case, prob$Yes)
auc(results.roc7)

## Area under the curve: 0.8656

plot(results.roc7, print.thres = "best", printe.thres.best.method = "closest.topleft")


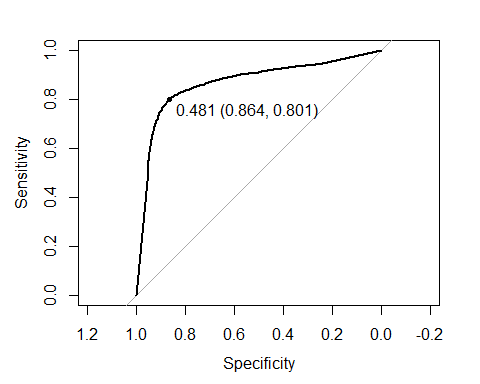


ML deep learning with Keras

library(keras)
library(tensorflow)
library(rlang)
library(tidyverse)
library(dplyr)
library(gapminder)
library(caret)
library(xgboost)
library(forcats)
library(mice)
library(vctrs)
library(naniar)
library(yardstick)
library(forcats)

datasettrain <- read_csv("U:/Andy's Thesis/MLoverdose in general/GeneralodML/train.set2.csv" , show_col_types = FALSE)

datasettest <- read_csv("U:/Andy's Thesis/MLoverdose in general/GeneralodML/test.set2.csv" , show_col_types = FALSE)

train.set <- datasettrain
test.set <- datasettest


train.set = train.set %>% mutate_if(is.character, as.factor)
test.set = test.set %>% mutate_if(is.character, as.factor)

dim(train.set)

## [1] 51342 49

dim(test.set)

## [1] 145016 49

nrow(train.set)

## [1] 51342

table(train.set$od_case)

##
## 0 1
## 25671 25671

dim(train.set)

## [1] 51342 49

dim(test.set)

## [1] 145016 49

table(train.set$od_case)

##
## 0 1
## 25671 25671

table(test.set$od_case)

##
## 0 1
## 134008 11008

class(train.set$od_case)

## [1] "numeric"

class(test.set$od_case)

## [1] "numeric"

x_train_tbl <- train.set %>%
 select(-od_case)

x_test_tbl <- test.set %>%
 select(-od_case)

y_train_vec <- train.set %>%
 select(od_case)

y_test_vec <- test.set %>%
 select(od_case)

glimpse(x_train_tbl)

## Rows: 51,342
## Columns: 48
## $ ost <dbl> 0, 0, 0, 0, 0, 1, 0, 0, 0, 0, 0, ~
## $ rheumatoid_arthritis_date_b <dbl> 0, 0, 0, 0, 0, 0, 0, 0, 0, 0, 0, ~
## $ parkinsonism_date_b <dbl> 0, 0, 0, 0, 0, 0, 0, 0, 0, 0, 0, ~
## $ osteo_arthritis_date_b <dbl> 0, 0, 1, 0, 0, 0, 1, 0, 0, 1, 1, ~
## $ osteo_porosis_date_b <dbl> 0, 0, 0, 1, 0, 0, 0, 0, 0, 0, 0, ~
## $ ms_date_b <dbl> 0, 0, 0, 0, 0, 0, 0, 0, 0, 0, 0, ~
## $ mood_anx_date_b <dbl> 0, 0, 1, 1, 0, 1, 0, 0, 1, 0, 0, ~
## $ isch_stroke_date_b <dbl> 0, 0, 0, 0, 0, 0, 0, 0, 0, 0, 0, ~
## $ ihd_date_b <dbl> 0, 0, 0, 1, 0, 0, 1, 0, 0, 0, 1, ~
## $ hypertension_date_b <dbl> 0, 0, 0, 1, 1, 0, 0, 0, 0, 1, 1, ~
## $ hosp_tia_date_b <dbl> 0, 0, 0, 0, 0, 0, 0, 0, 0, 0, 0, ~
## $ hosp_stroke_date_b <dbl> 0, 0, 0, 0, 0, 0, 0, 0, 0, 0, 0, ~
## $ heart_failure_date_b <dbl> 0, 0, 0, 0, 0, 0, 0, 0, 0, 0, 1, ~
## $ haemorr_stroke_date_b <dbl> 0, 0, 0, 0, 0, 0, 0, 0, 0, 0, 0, ~
## $ epilepsy_date_b <dbl> 0, 0, 0, 0, 0, 0, 0, 1, 0, 0, 0, ~
## $ diabetes_date_b <dbl> 0, 0, 0, 0, 0, 0, 0, 0, 1, 1, 0, ~
## $ depression_date_b <dbl> 0, 0, 1, 1, 0, 1, 0, 0, 1, 0, 0, ~
## $ copd_date_b <dbl> 0, 0, 0, 0, 0, 0, 0, 0, 0, 0, 0, ~
## $ ckd_date_b <dbl> 0, 0, 0, 1, 0, 0, 0, 0, 0, 0, 0, ~
## $ asthma_date_b <dbl> 0, 1, 1, 0, 0, 0, 0, 0, 0, 1, 0, ~
## $ angina_date_b <dbl> 0, 0, 0, 0, 0, 0, 0, 0, 0, 0, 0, ~
## $ ami_date_b <dbl> 0, 0, 0, 1, 0, 0, 0, 0, 0, 0, 0, ~
## $ alzheimer_dementia_date_b <dbl> 0, 0, 0, 0, 0, 0, 0, 0, 0, 0, 1, ~
## $ Tobaccouse <dbl> 0, 0, 0, 0, 0, 0, 0, 0, 0, 0, 0, ~
## $ Tissueinfection <dbl> 1, 0, 1, 1, 1, 1, 0, 0, 0, 1, 1, ~
## $ substancerelated.disorders <dbl> 1, 0, 0, 0, 0, 1, 0, 0, 0, 0, 0, ~
## $ Stimulantuse <dbl> 1, 0, 0, 0, 0, 0, 0, 0, 0, 0, 0, ~
## $ Sepsis <dbl> 0, 0, 0, 0, 0, 0, 0, 0, 0, 0, 0, ~
## $ Sedativeandhypnoticuse <dbl> 0, 0, 0, 0, 0, 0, 0, 0, 0, 0, 0, ~
## $ psychoticdisorders <dbl> 1, 0, 0, 0, 0, 0, 0, 0, 0, 0, 0, ~
## $ Polysubstance <dbl> 1, 0, 0, 0, 0, 1, 0, 0, 0, 0, 0, ~
## $ Personalitydisorders <dbl> 1, 0, 0, 0, 0, 0, 0, 0, 0, 0, 0, ~
## $ Otherpsychoactivedruguse <dbl> 1, 0, 0, 0, 0, 0, 0, 0, 0, 0, 0, ~
## $ Osteomyelitis <dbl> 0, 0, 1, 0, 0, 0, 0, 0, 0, 0, 0, ~
## $ Opioiduse <dbl> 1, 0, 0, 0, 0, 0, 0, 0, 0, 0, 0, ~
## $ Neuroticrelateddisorders <dbl> 1, 0, 0, 0, 0, 1, 0, 0, 1, 0, 0, ~
## $ Neurocognitivedisorders <dbl> 1, 0, 0, 0, 0, 1, 0, 0, 0, 0, 1, ~
## $ Multiplementalillness <dbl> 0, 0, 0, 0, 0, 1, 0, 0, 1, 0, 0, ~
## $ Mooddisorders <dbl> 0, 0, 1, 0, 0, 1, 0, 0, 1, 0, 0, ~
## $ Intellectualdisability <dbl> 0, 0, 0, 0, 0, 0, 0, 0, 0, 0, 0, ~
## $ Hallucinogensuse <dbl> 0, 0, 0, 0, 0, 0, 0, 0, 0, 0, 0, ~
## $ Endocarditis <dbl> 0, 0, 0, 0, 0, 0, 0, 0, 0, 0, 0, ~
## $ earlyonsetdisorders <dbl> 0, 0, 0, 0, 0, 0, 0, 0, 0, 0, 0, ~
## $ Developmentdisorders <dbl> 0, 0, 0, 0, 0, 0, 0, 0, 0, 0, 0, ~
## $ Cocaineuse <dbl> 0, 0, 0, 0, 0, 0, 0, 0, 0, 0, 0, ~
## $ Cannabinoiduse <dbl> 0, 0, 0, 0, 0, 0, 0, 0, 0, 0, 0, ~
## $ Behaviouralpsychologicaldisturbances <dbl> 0, 0, 0, 0, 0, 0, 0, 0, 0, 0, 0, ~
## $ Alcoholuse <dbl> 1, 1, 1, 1, 1, 1, 1, 1, 1, 1, 1, ~

model_keras <- keras_model_sequential()

model_keras %>%
 layer_dense(
 units = 49,
 activation = "relu",
 input_shape = ncol(x_train_tbl)) %>%
 layer_dropout(rate = 0.001) %>%
 layer_dense(
 units = 49,
 activation = "relu") %>%
 layer_dropout(rate = 0.001) %>%
 layer_dense(
 units = 49,
 activation = "relu") %>%
 layer_dropout(rate = 0.001) %>%
 layer_dense(
 units = 49,
 activation = "relu") %>%
 layer_dropout(rate = 0.001) %>%
 layer_dense(
 units = 49,
 activation = "relu") %>%
 layer_dropout(rate = 0.001) %>%
 layer_dense(
 units = 1,
 activation = "sigmoid") %>%
 compile(
 optimizer = 'adam',
 loss = 'binary_crossentropy',
 metrics = c('accuracy')
 )

model_keras

## Model
## ________________________________________________________________________________
## Layer (type) Output Shape Param #
## ================================================================================
## dense_5 (Dense) (None, 49) 2401
## ________________________________________________________________________________
## dropout_4 (Dropout) (None, 49) 0
## ________________________________________________________________________________
## dense_4 (Dense) (None, 49) 2450
## ________________________________________________________________________________
## dropout_3 (Dropout) (None, 49) 0
## ________________________________________________________________________________
## dense_3 (Dense) (None, 49) 2450
## ________________________________________________________________________________
## dropout_2 (Dropout) (None, 49) 0
## ________________________________________________________________________________
## dense_2 (Dense) (None, 49) 2450
## ________________________________________________________________________________
## dropout_1 (Dropout) (None, 49) 0
## ________________________________________________________________________________
## dense_1 (Dense) (None, 49) 2450
## ________________________________________________________________________________
## dropout (Dropout) (None, 49) 0
## ________________________________________________________________________________
## dense (Dense) (None, 1) 50
## ================================================================================
## Total params: 12,251
## Trainable params: 12,251
## Non-trainable params: 0
## ________________________________________________________________________________

history <- fit(
 object = model_keras,
 x = as.matrix(x_train_tbl),
 y = as.matrix(y_train_vec),
 batch_size = 300,
 epochs = 1000,
 validation_split = 0.3
)

print(history)

## Trained on 35,939 samples (batch_size=300, epochs=1,000)
## Final epoch (plot to see history):
## val_loss: 1.309
## val_acc: 0.7212
## loss: 0.1665
## acc: 0.9342

plot(history)


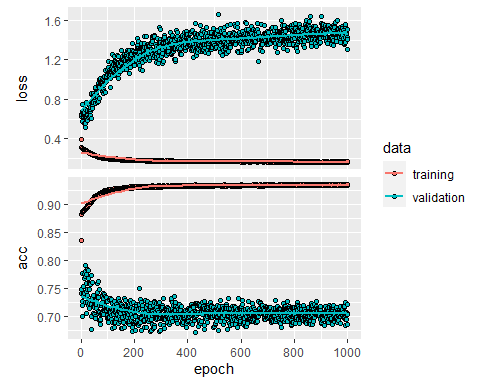


yhat_keras_class_vec <- predict_classes(object = model_keras, x = as.matrix(x_test_tbl)) %>%
 as.vector()

yhat_keras_prob_vec <- predict_proba(object = model_keras, x = as.matrix(x_test_tbl)) %>%
 as.vector()

estimates_tbl <- y_test_vec %>%
 add_column(
 estimate = as.factor(yhat_keras_class_vec),
 class_prob = yhat_keras_prob_vec
)

estimates_tbl

## # A tibble: 145,016 x 3
## od_case estimate class_prob
## <dbl> <fct> <dbl>
## 1 1 1 0.815
## 2 1 0 0.169
## 3 1 0 0.137
## 4 1 1 0.966
## 5 1 1 1.00
## 6 1 1 0.929
## 7 1 1 1.00
## 8 1 0 0.0000450
## 9 1 1 1
## 10 1 1 1
## # i 145,006 more rows

estimates_tbl = estimates_tbl %>% mutate_at(vars(od_case), list(factor))
class(estimates_tbl$od_case)

## [1] "factor"

levels(estimates_tbl$od_case)

## [1] "0" "1"

levels(estimates_tbl$estimate)

## [1] "0" "1"

options(yardstick.event_first = FALSE)

estimates_tbl %>% conf_mat(od_case, estimate)

## Truth
## Prediction 0 1
## 0 121695 3165
## 1 12313 7843

estimates_tbl %>% metrics(od_case, estimate)

## # A tibble: 2 x 3
## .metric .estimator .estimate
## <chr> <chr> <dbl>
## 1 accuracy binary 0.893
## 2 kap binary 0.449

estimates_tbl %>% roc_auc(od_case, class_prob)

## # A tibble: 1 x 3
## .metric .estimator .estimate
## <chr> <chr> <dbl>
## 1 roc_auc binary 0.855

ML modeling with Tidy models

library(keras)
library(tensorflow)
library(rlang)
library(tidyverse)
library(dplyr)
library(gapminder)
library(xgboost)
library(forcats)
library(mice)
library(vctrs)
library(naniar)
library(yardstick)
library(forcats)
library(Boruta)
library(ROSE)
library(imbalance)
library(rnn)
library(ROCR)
library(SHAPforxgboost)
library(randomForest)
library(mlbench)
library(ggplot2)
library(data.table)
library(here)
library(tidymodels)
library(parsnip)
library(caret)
library(kknn)
library(yardstick)
library(tune)

###Testing the original sample

datasettrain <- read_csv("U:/Andy's Thesis/MLoverdose in general/GeneralodML/train.set2.csv" , show_col_types = FALSE)

datasettest <- read_csv("U:/Andy's Thesis/MLoverdose in general/GeneralodML/test.set2.csv" , show_col_types = FALSE)

train.set <- datasettrain
test.set <- datasettest

train.set <- train.set %>%
 mutate(od_case = recode(od_case, "0" = "No", "1" = "Yes"))

test.set <- test.set %>%
 mutate(od_case = recode(od_case, "0" = "No", "1" = "Yes"))

train.set = train.set %>% mutate_if(is.character, as.factor)
test.set = test.set %>% mutate_if(is.character, as.factor)

dim(train.set)

## [1] 51342 49

dim(test.set)

## [1] 145016 49

nrow(train.set)

## [1] 51342

table(train.set$od_case)

##
## No Yes
## 25671 25671

dim(train.set)

## [1] 51342 49

dim(test.set)

## [1] 145016 49

table(train.set$od_case)

##
## No Yes
## 25671 25671

table(test.set$od_case)

##
## No Yes
## 134008 11008

class(train.set$od_case)

## [1] "factor"

class(test.set$od_case)

## [1] "factor"

#XGBoost

xgb_spec <- boost_tree(
 trees = 300) %>%
 set_engine("xgboost") %>%
 set_mode("classification")

overdose_rec <-
 recipe(od_case ~., data = train.set)


xgbworkflow <- workflow() %>%
 add_model(xgb_spec) %>%
 add_recipe(overdose_rec)

xgb_fit <- xgbworkflow %>%
 fit(data = train.set)

class_pred <- predict(xgb_fit, test.set)
prob_pred <- predict(xgb_fit, test.set, type="prob")
predictions <- data.frame(class_pred, prob_pred) %>%
 setNames(c("XGB_Class", "LR_DeathProb", "R_NotDeathProb"))

ODD_preds <- test.set %>%
 bind_cols(predictions)

caret::confusionMatrix(ODD_preds$XGB_Class, ODD_preds$od_case, positive = "Yes")

## Confusion Matrix and Statistics
##
## Reference
## Prediction No Yes
## No 119123 2035
## Yes 14885 8973
##
## Accuracy : 0.8833
## 95% CI : (0.8817, 0.885)
## No Information Rate : 0.9241
## P-Value [Acc > NIR] : 1
##
## Kappa : 0.4585
##
## Mcnemar's Test P-Value : <2e-16
##
## Sensitivity : 0.81513
## Specificity : 0.88892
## Pos Pred Value : 0.37610
## Neg Pred Value : 0.98320
## Prevalence : 0.07591
## Detection Rate : 0.06188
## Detection Prevalence : 0.16452
## Balanced Accuracy : 0.85203
##
## 'Positive' Class : Yes
##

#Random Forest

rf_mod <-
 rand_forest(trees=500) %>%
 set_engine("ranger") %>%
 set_mode("classification")

rf_fit <-
 rf_mod %>%
 fit(od_case ~., data = train.set)

class_pred <- predict(rf_fit, test.set)
prob_pred <- predict(rf_fit, test.set, type="prob")
predictions <- data.frame(class_pred, prob_pred) %>%
 setNames(c("RF_Class", "RF_DeathProb", "RF_NotDeathProb"))

ODD_preds <- test.set %>%
 bind_cols(predictions)

table(ODD_preds$od_case)

##
## No Yes
## 134008 11008

caret::confusionMatrix(ODD_preds$RF_Class, ODD_preds$od_case, positive = "Yes")

## Confusion Matrix and Statistics
##
## Reference
## Prediction No Yes
## No 119667 1994
## Yes 14341 9014
##
## Accuracy : 0.8874
## 95% CI : (0.8857, 0.889)
## No Information Rate : 0.9241
## P-Value [Acc > NIR] : 1
##
## Kappa : 0.4699
##
## Mcnemar's Test P-Value : <2e-16
##
## Sensitivity : 0.81886
## Specificity : 0.89298
## Pos Pred Value : 0.38596
## Neg Pred Value : 0.98361
## Prevalence : 0.07591
## Detection Rate : 0.06216
## Detection Prevalence : 0.16105
## Balanced Accuracy : 0.85592
##
## 'Positive' Class : Yes
##

###feature selected RF (From Boruta)

datasettrain <- read_csv("U:/Andy's Thesis/MLoverdose in general/GeneralodML/train.set2.csv" , show_col_types = FALSE)

datasettest <- read_csv("U:/Andy's Thesis/MLoverdose in general/GeneralodML/test.set2.csv" , show_col_types = FALSE)

train.set <- datasettrain
test.set <- datasettest

train.set <- train.set %>%
 mutate(od_case = recode(od_case, "0" = "No", "1" = "Yes"))

test.set <- test.set %>%
 mutate(od_case = recode(od_case, "0" = "No", "1" = "Yes"))

train.set = train.set %>% mutate_if(is.character, as.factor)
test.set = test.set %>% mutate_if(is.character, as.factor)

dim(train.set)

## [1] 51342 49

dim(test.set)

## [1] 145016 49

nrow(train.set)

## [1] 51342

table(train.set$od_case)

##
## No Yes
## 25671 25671

dim(train.set)

## [1] 51342 49

dim(test.set)

## [1] 145016 49

table(train.set$od_case)

##
## No Yes
## 25671 25671

table(test.set$od_case)

##
## No Yes
## 134008 11008

class(train.set$od_case)

## [1] "factor"

class(test.set$od_case)

## [1] "factor"

train.set <- train.set%>%
 select(od_case, alzheimer_dementia_date_b, ami_date_b, angina_date_b, ckd_date_b, copd_date_b, depression_date_b, diabetes_date_b, heart_failure_date_b, hypertension_date_b, hosp_stroke_date_b, haemorr_stroke_date_b, isch_stroke_date_b, ihd_date_b, mood_anx_date_b, osteo_arthritis_date_b, osteo_porosis_date_b, ost, substancerelated.disorders, Tobaccouse, Cocaineuse, earlyonsetdisorders, Mooddisorders, Multiplementalillness, Neurocognitivedisorders, Neuroticrelateddisorders, Opioiduse, Osteomyelitis, Otherpsychoactivedruguse, Personalitydisorders, Polysubstance, psychoticdisorders, Sepsis, Stimulantuse, Tissueinfection)

test.set <- test.set%>%
 select(od_case, alzheimer_dementia_date_b, ami_date_b, angina_date_b, ckd_date_b, copd_date_b, depression_date_b, diabetes_date_b, heart_failure_date_b, hypertension_date_b, hosp_stroke_date_b, haemorr_stroke_date_b, isch_stroke_date_b, ihd_date_b, mood_anx_date_b, osteo_arthritis_date_b, osteo_porosis_date_b, ost, substancerelated.disorders, Tobaccouse, Cocaineuse, earlyonsetdisorders, Mooddisorders, Multiplementalillness, Neurocognitivedisorders, Neuroticrelateddisorders, Opioiduse, Osteomyelitis, Otherpsychoactivedruguse, Personalitydisorders, Polysubstance, psychoticdisorders, Sepsis, Stimulantuse, Tissueinfection)

rf_mod <-
 rand_forest(trees=500) %>%
 set_engine("ranger") %>%
 set_mode("classification")

rf_fit <-
 rf_mod %>%
 fit(od_case ~., data = train.set)

class_pred <- predict(rf_fit, test.set)
prob_pred <- predict(rf_fit, test.set, type="prob")
predictions <- data.frame(class_pred, prob_pred) %>%
 setNames(c("RF_Class", "RF_DeathProb", "RF_NotDeathProb"))

ODD_preds <- test.set %>%
 bind_cols(predictions)

caret::confusionMatrix(ODD_preds$RF_Class, ODD_preds$od_case, positive = "Yes")

## Confusion Matrix and Statistics
##
## Reference
## Prediction No Yes
## No 120385 2148
## Yes 13623 8860
##
## Accuracy : 0.8912
## 95% CI : (0.8896, 0.8928)
## No Information Rate : 0.9241
## P-Value [Acc > NIR] : 1
##
## Kappa : 0.4757
##
## Mcnemar's Test P-Value : <2e-16
##
## Sensitivity : 0.80487
## Specificity : 0.89834
## Pos Pred Value : 0.39408
## Neg Pred Value : 0.98247
## Prevalence : 0.07591
## Detection Rate : 0.06110
## Detection Prevalence : 0.15504
## Balanced Accuracy : 0.85161
##
## 'Positive' Class : Yes
##

Validating all the models

datasettrain <- read_csv("U:/Andy's Thesis/MLoverdose in general/GeneralodML/train.set2.csv" , show_col_types = FALSE)

datasettest <- read_csv("U:/Andy's Thesis/MLoverdose in general/GeneralodML/test.set2.csv" , show_col_types = FALSE)

train.set <- datasettrain
test.set <- datasettest

train.set <- train.set %>%
 mutate(od_case = recode(od_case, "0" = "No", "1" = "Yes"))

test.set <- test.set %>%
 mutate(od_case = recode(od_case, "0" = "No", "1" = "Yes"))

train.set = train.set %>% mutate_if(is.character, as.factor)
test.set = test.set %>% mutate_if(is.character, as.factor)

dim(train.set)

## [1] 51342 49

dim(test.set)

## [1] 145016 49

nrow(train.set)

## [1] 51342

table(train.set$od_case)

##
## No Yes
## 25671 25671

dim(train.set)

## [1] 51342 49

dim(test.set)

## [1] 145016 49

table(train.set$od_case)

##
## No Yes
## 25671 25671

table(test.set$od_case)

##
## No Yes
## 134008 11008

class(train.set$od_case)

## [1] "factor"

class(test.set$od_case)

## [1] "factor"

#Xgboost

ten_fold <- vfold_cv(train.set, v=10)

xgb_spec <- boost_tree(
 trees = 300) %>%
 set_engine("xgboost") %>%
 set_mode("classification")

overdose_rec <-
 recipe(od_case ~., data = train.set)


xgbworkflow <- workflow() %>%
 add_model(xgb_spec) %>%
 add_recipe(overdose_rec)

xgb_fit <- xgbworkflow %>%
 fit(data = train.set)

xgb_fit_rs <-
 xgbworkflow %>%
 fit_resamples(ten_fold)

collect_metrics(xgb_fit_rs)

## # A tibble: 2 x 5
## .metric .estimator mean n std_err
## <chr> <chr> <dbl> <int> <dbl>
## 1 accuracy binary 0.855 10 0.00103
## 2 roc_auc binary 0.911 10 0.00113

#Random Forest

ten_fold <- vfold_cv(train.set, v=10)

rf_spec <- rand_forest(
 trees = 500) %>%
 set_engine("ranger") %>%
 set_mode("classification")

overdose_rec <-
 recipe(od_case ~., data = train.set)


rfworkflow <- workflow() %>%
 add_model(rf_spec) %>%
 add_recipe(overdose_rec)

rf_fit <- rfworkflow %>%
 fit(data = train.set)

rf_fit_rs <-
 rfworkflow %>%
 fit_resamples(ten_fold)

collect_metrics(rf_fit_rs)

## # A tibble: 2 x 5
## .metric .estimator mean n std_err
## <chr> <chr> <dbl> <int> <dbl>
## 1 accuracy binary 0.859 10 0.00168
## 2 roc_auc binary 0.917 10 0.00170

#Logistic Regression

ten_fold <- vfold_cv(train.set, v=10)

glm_spec <- logistic_reg() %>%
 set_engine("glm") %>%
 translate()

overdose_rec <-
 recipe(od_case ~., data = train.set)


glmworkflow <- workflow() %>%
 add_model(glm_spec) %>%
 add_recipe(overdose_rec)

glm_fit <- glmworkflow %>%
 fit(data = train.set)

glm_fit_rs <-
 glmworkflow %>%
 fit_resamples(ten_fold)

collect_metrics(glm_fit_rs)

## # A tibble: 2 x 5
## .metric .estimator mean n std_err
## <chr> <chr> <dbl> <int> <dbl>
## 1 accuracy binary 0.856 10 0.00168
## 2 roc_auc binary 0.914 10 0.00127

#KNN

ten_fold <- vfold_cv(train.set, v=10)

knn_spec <- nearest_neighbor() %>%
 set_engine("kknn") %>%
 set_mode("classification") %>%
 translate

overdose_rec <-
 recipe(od_case ~., data = train.set)


knnworkflow <- workflow() %>%
 add_model(knn_spec) %>%
 add_recipe(overdose_rec)

knn_fit <- knnworkflow %>%
 fit(data = train.set)

knn_fit_rs <-
 knnworkflow %>%
 fit_resamples(ten_fold)

collect_metrics(knn_fit_rs)

## # A tibble: 2 x 5
## .metric .estimator mean n std_err
## <chr> <chr> <dbl> <int> <dbl>
## 1 accuracy binary 0.761 10 0.00139
## 2 roc_auc binary 0.836 10 0.00203

#Testing for the best performing model

### XGBoost
class_pred <- predict(xgb_fit, test.set)
prob_pred <- predict(xgb_fit, test.set, type="prob")
predictions <- data.frame(class_pred, prob_pred) %>%
 setNames(c("XGB_Class", "LR_DeathProb", "R_NotDeathProb"))

ODD_preds <- test.set %>%
 bind_cols(predictions)


cmxgboost <- caret::confusionMatrix(ODD_preds$XGB_Class, ODD_preds$od_case, positive = "Yes")

print(cmxgboost)

## Confusion Matrix and Statistics
##
## Reference
## Prediction No Yes
## No 119123 2035
## Yes 14885 8973
##
## Accuracy : 0.8833
## 95% CI : (0.8817, 0.885)
## No Information Rate : 0.9241
## P-Value [Acc > NIR] : 1
##
## Kappa : 0.4585
##
## Mcnemar's Test P-Value : <2e-16
##
## Sensitivity : 0.81513
## Specificity : 0.88892
## Pos Pred Value : 0.37610
## Neg Pred Value : 0.98320
## Prevalence : 0.07591
## Detection Rate : 0.06188
## Detection Prevalence : 0.16452
## Balanced Accuracy : 0.85203
##
## 'Positive' Class : Yes
##

### RF


class_pred <- predict(rf_fit, test.set)
prob_pred <- predict(rf_fit, test.set, type="prob")
predictions <- data.frame(class_pred, prob_pred) %>%
 setNames(c("rf_Class", "LR_DeathProb", "R_NotDeathProb"))

ODD_preds <- test.set %>%
 bind_cols(predictions)


cmrf <- caret::confusionMatrix(ODD_preds$rf_Class, ODD_preds$od_case, positive = "Yes")

print(cmrf)

## Confusion Matrix and Statistics
##
## Reference
## Prediction No Yes
## No 119655 1990
## Yes 14353 9018
##
## Accuracy : 0.8873
## 95% CI : (0.8857, 0.8889)
## No Information Rate : 0.9241
## P-Value [Acc > NIR] : 1
##
## Kappa : 0.4699
##
## Mcnemar's Test P-Value : <2e-16
##
## Sensitivity : 0.81922
## Specificity : 0.89289
## Pos Pred Value : 0.38586
## Neg Pred Value : 0.98364
## Prevalence : 0.07591
## Detection Rate : 0.06219
## Detection Prevalence : 0.16116
## Balanced Accuracy : 0.85606
##
## 'Positive' Class : Yes
##

### GLM
class_pred <- predict(glm_fit, test.set)
prob_pred <- predict(glm_fit, test.set, type="prob")
predictions <- data.frame(class_pred, prob_pred) %>%
 setNames(c("glm_Class", "LR_DeathProb", "R_NotDeathProb"))

ODD_preds <- test.set %>%
 bind_cols(predictions)

cm <- caret::confusionMatrix(ODD_preds$glm_Class, ODD_preds$od_case, positive = "Yes")

print(cm)

## Confusion Matrix and Statistics
##
## Reference
## Prediction No Yes
## No 118866 2037
## Yes 15142 8971
##
## Accuracy : 0.8815
## 95% CI : (0.8799, 0.8832)
## No Information Rate : 0.9241
## P-Value [Acc > NIR] : 1
##
## Kappa : 0.4539
##
## Mcnemar's Test P-Value : <2e-16
##
## Sensitivity : 0.81495
## Specificity : 0.88701
## Pos Pred Value : 0.37204
## Neg Pred Value : 0.98315
## Prevalence : 0.07591
## Detection Rate : 0.06186
## Detection Prevalence : 0.16628
## Balanced Accuracy : 0.85098
##
## 'Positive' Class : Yes
##

### KNN

class_pred <- predict(knn_fit, test.set)
prob_pred <- predict(knn_fit, test.set, type="prob")
predictions <- data.frame(class_pred, prob_pred) %>%
 setNames(c("knn_Class", "LR_DeathProb", "R_NotDeathProb"))

ODD_preds <- test.set %>%
 bind_cols(predictions)


knncm <- caret::confusionMatrix(ODD_preds$knn_Class, ODD_preds$od_case, positive = "Yes")

print(knncm)

## Confusion Matrix and Statistics
##
## Reference
## Prediction No Yes
## No 121556 4332
## Yes 12452 6676
##
## Accuracy : 0.8843
## 95% CI : (0.8826, 0.8859)
## No Information Rate : 0.9241
## P-Value [Acc > NIR] : 1
##
## Kappa : 0.3837
##
## Mcnemar's Test P-Value : <2e-16
##
## Sensitivity : 0.60647
## Specificity : 0.90708
## Pos Pred Value : 0.34902
## Neg Pred Value : 0.96559
## Prevalence : 0.07591
## Detection Rate : 0.04604
## Detection Prevalence : 0.13190
## Balanced Accuracy : 0.75677
##
## 'Positive' Class : Yes
##
